# Supplementary material for: APP and APLP2 interact with the synaptic release machinery and facilitate transmitter release at hippocampal synapses
Source: eLife. 2015 Nov 9;4:e09743. doi: 10.7554/eLife.09743 (PMC4755753; doi:10.7554/eLife.09743)
Supplement: Figure 3—source data 1. — DOI: http://dx.doi.org/10.7554/eLife.09743.007 [file elife-09743-fig3-data1.xlsx]

## Sheet: One-way ANOVA of I-O
Table Analyzed	I-O slopes values
ANOVA summary
F	6.366
P value	0.0004
P value summary	***
Are differences among means statistically significant? (P < 0.05)	Yes
R square	0.3614
Brown-Forsythe test
F (DFn, DFd)	0.5376 (4, 45)
P value	0.7089
P value summary	ns
Significantly different standard deviations? (P < 0.05)	No
Bartlett's test
Bartlett's statistic (corrected)	1.895
P value	0.7551
P value summary	ns
Significantly different standard deviations? (P < 0.05)	No
ANOVA table	SS	DF	MS	F (DFn, DFd)	P value
Treatment (between columns)	293.1	4	73.26	F (4, 45) = 6.366	P = 0.0004
Residual (within columns)	517.9	45	11.51
Total	810.9	49
Data summary
Number of treatments (columns)	5
Number of values (total)	50

## Sheet: Tukey's mult. comp. test
Number of families	1
Number of comparisons per family	10
Alpha	0.05
Tukey's multiple comparisons test	Mean Diff.	95% CI of diff.	Significant?	Summary
ACSF ( 9/5) vs. Pen1-JCasp 1000 nM (13/7)	6.772	2.592 to 10.95	Yes	***		A-B
ACSF ( 9/5) vs. Pen1-ScJCasp 1000 nM (7/4)	1.357	-3.500 to 6.215	No	ns		A-C
ACSF ( 9/5) vs. Pen1-JCasp 10 nM (7/4)	1.913	-2.944 to 6.771	No	ns		A-D
ACSF ( 9/5) vs. Pen1-JCasp 100 nM (14/7)	3.225	-0.8937 to 7.343	No	ns		A-E
Pen1-JCasp 1000 nM (13/7) vs. Pen1-ScJCasp 1000 nM (7/4)	-5.414	-9.933 to -0.8953	Yes	*		B-C
Pen1-JCasp 1000 nM (13/7) vs. Pen1-JCasp 10 nM (7/4)	-4.858	-9.377 to -0.3393	Yes	*		B-D
Pen1-JCasp 1000 nM (13/7) vs. Pen1-JCasp 100 nM (14/7)	-3.547	-7.260 to 0.1655	No	ns		B-E
Pen1-ScJCasp 1000 nM (7/4) vs. Pen1-JCasp 10 nM (7/4)	0.556	-4.596 to 5.708	No	ns		C-D
Pen1-ScJCasp 1000 nM (7/4) vs. Pen1-JCasp 100 nM (14/7)	1.867	-2.595 to 6.329	No	ns		C-E
Pen1-JCasp 10 nM (7/4) vs. Pen1-JCasp 100 nM (14/7)	1.311	-3.151 to 5.773	No	ns		D-E
Test details	Mean 1	Mean 2	Mean Diff.	SE of diff.	n1	n2	q	DF
ACSF ( 9/5) vs. Pen1-JCasp 1000 nM (13/7)	8.811	2.039	6.772	1.471	9	13	6.51	45
ACSF ( 9/5) vs. Pen1-ScJCasp 1000 nM (7/4)	8.811	7.454	1.357	1.71	9	7	1.123	45
ACSF ( 9/5) vs. Pen1-JCasp 10 nM (7/4)	8.811	6.898	1.913	1.71	9	7	1.583	45
ACSF ( 9/5) vs. Pen1-JCasp 100 nM (14/7)	8.811	5.587	3.225	1.449	9	14	3.146	45
Pen1-JCasp 1000 nM (13/7) vs. Pen1-ScJCasp 1000 nM (7/4)	2.039	7.454	-5.414	1.59	13	7	4.815	45
Pen1-JCasp 1000 nM (13/7) vs. Pen1-JCasp 10 nM (7/4)	2.039	6.898	-4.858	1.59	13	7	4.32	45
Pen1-JCasp 1000 nM (13/7) vs. Pen1-JCasp 100 nM (14/7)	2.039	5.587	-3.547	1.307	13	14	3.839	45
Pen1-ScJCasp 1000 nM (7/4) vs. Pen1-JCasp 10 nM (7/4)	7.454	6.898	0.556	1.813	7	7	0.4336	45
Pen1-ScJCasp 1000 nM (7/4) vs. Pen1-JCasp 100 nM (14/7)	7.454	5.587	1.867	1.57	7	14	1.681	45
Pen1-JCasp 10 nM (7/4) vs. Pen1-JCasp 100 nM (14/7)	6.898	5.587	1.311	1.57	7	14	1.181	45
	0.005786	-0.2973 to 0.3089	No	ns
