# Supplementary material for: APP and APLP2 interact with the synaptic release machinery and facilitate transmitter release at hippocampal synapses
Source: eLife. 2015 Nov 9;4:e09743. doi: 10.7554/eLife.09743 (PMC4755753; doi:10.7554/eLife.09743)
Supplement: Figure 3—source data 2. — DOI: http://dx.doi.org/10.7554/eLife.09743.008 [file elife-09743-fig3-data2.xlsx]

## Sheet: 2way ANOVA of PPR
Table Analyzed	PPR
Two-way RM ANOVA	Matching: Stacked
Alpha	0.05
Source of Variation	% of total variation	P value	P value summary	Significant?
Interaction	4.67	< 0.0001	****	Yes
Time	44.03	< 0.0001	****	Yes
Column Factor	19.5	< 0.0001	****	Yes
Subjects (matching)	10.92	< 0.0001	****	Yes
ANOVA table	SS	DF	MS	F (DFn, DFd)	P value
Interaction	4.97	16	0.3106	F (16, 180) = 5.808	P < 0.0001
Time	46.86	4	11.71	F (4, 180) = 219.0	P < 0.0001
Column Factor	20.75	4	5.187	F (4, 45) = 20.08	P < 0.0001
Subjects (matching)	11.63	45	0.2584	F (45, 180) = 4.831	P < 0.0001
Residual	9.627	180	0.05349
Number of missing values	0

## Sheet: Tukey's mult. comp. test
Within each row (Interstimulus Interval), compare tretaments (simple effects within Interstimulus Interval)
Number of families	5
Number of comparisons per family	10
Alpha	0.05
Tukey's multiple comparisons test	Mean Diff.	95% CI of diff.	Significant?	Summary
Interstimuls interval 500 ms
Pen1-JCasp 100 nM (14/7) vs. Pen1-JCasp 10 nM (7/4)	0.1022	-0.2890 to 0.4935	No	ns
Pen1-JCasp 100 nM (14/7) vs. Pen1-ScJCasp 1000 nM (7/4)	0.09307	-0.2982 to 0.4843	No	ns
Pen1-JCasp 100 nM (14/7) vs. ACSF (9/5)	0.06626	-0.2949 to 0.4274	No	ns
Pen1-JCasp 100 nM (14/7) vs. Pen1-JCasp 1000 nM (13/7)	-0.1078	-0.4334 to 0.2177	No	ns
Pen1-JCasp 10 nM (7/4) vs. Pen1-ScJCasp 1000 nM (7/4)	-0.009143	-0.4609 to 0.4426	No	ns
Pen1-JCasp 10 nM (7/4) vs. ACSF (9/5)	-0.03595	-0.4619 to 0.3900	No	ns
Pen1-JCasp 10 nM (7/4) vs. Pen1-JCasp 1000 nM (13/7)	-0.2101	-0.6063 to 0.1862	No	ns
Pen1-ScJCasp 1000 nM (7/4) vs. ACSF (9/5)	-0.02681	-0.4528 to 0.3991	No	ns
Pen1-ScJCasp 1000 nM (7/4) vs. Pen1-JCasp 1000 nM (13/7)	-0.2009	-0.5972 to 0.1953	No	ns
ACSF (9/5) vs. Pen1-JCasp 1000 nM (13/7)	-0.1741	-0.5406 to 0.1924	No	ns
Interstimuls interval 200 ms
Pen1-JCasp 100 nM (14/7) vs. Pen1-JCasp 10 nM (7/4)	0.2613	-0.1300 to 0.6525	No	ns
Pen1-JCasp 100 nM (14/7) vs. Pen1-ScJCasp 1000 nM (7/4)	0.3859	-0.005400 to 0.7771	No	ns
Pen1-JCasp 100 nM (14/7) vs. ACSF (9/5)	0.2955	-0.06564 to 0.6566	No	ns
Pen1-JCasp 100 nM (14/7) vs. Pen1-JCasp 1000 nM (13/7)	-0.09186	-0.4174 to 0.2337	No	ns
Pen1-JCasp 10 nM (7/4) vs. Pen1-ScJCasp 1000 nM (7/4)	0.1246	-0.3272 to 0.5764	No	ns
Pen1-JCasp 10 nM (7/4) vs. ACSF (9/5)	0.03419	-0.3918 to 0.4601	No	ns
Pen1-JCasp 10 nM (7/4) vs. Pen1-JCasp 1000 nM (13/7)	-0.3531	-0.7494 to 0.04310	No	ns
Pen1-ScJCasp 1000 nM (7/4) vs. ACSF (9/5)	-0.09038	-0.5163 to 0.3356	No	ns
Pen1-ScJCasp 1000 nM (7/4) vs. Pen1-JCasp 1000 nM (13/7)	-0.4777	-0.8740 to -0.08147	Yes	**
ACSF (9/5) vs. Pen1-JCasp 1000 nM (13/7)	-0.3873	-0.7538 to -0.02082	Yes	*
Interstimuls interval 80 ms
Pen1-JCasp 100 nM (14/7) vs. Pen1-JCasp 10 nM (7/4)	0.3541	-0.03719 to 0.7453	No	ns
Pen1-JCasp 100 nM (14/7) vs. Pen1-ScJCasp 1000 nM (7/4)	0.5834	0.1921 to 0.9746	Yes	***
Pen1-JCasp 100 nM (14/7) vs. ACSF (9/5)	0.4834	0.1223 to 0.8445	Yes	**
Pen1-JCasp 100 nM (14/7) vs. Pen1-JCasp 1000 nM (13/7)	-0.3254	-0.6510 to 0.0001226	No	ns
Pen1-JCasp 10 nM (7/4) vs. Pen1-ScJCasp 1000 nM (7/4)	0.2293	-0.2225 to 0.6811	No	ns
Pen1-JCasp 10 nM (7/4) vs. ACSF (9/5)	0.1293	-0.2966 to 0.5553	No	ns
Pen1-JCasp 10 nM (7/4) vs. Pen1-JCasp 1000 nM (13/7)	-0.6795	-1.076 to -0.2833	Yes	****
Pen1-ScJCasp 1000 nM (7/4) vs. ACSF (9/5)	-0.09997	-0.5259 to 0.3260	No	ns
Pen1-ScJCasp 1000 nM (7/4) vs. Pen1-JCasp 1000 nM (13/7)	-0.9088	-1.305 to -0.5125	Yes	****
ACSF (9/5) vs. Pen1-JCasp 1000 nM (13/7)	-0.8088	-1.175 to -0.4423	Yes	****
Interstimuls interval 40 ms
Pen1-JCasp 100 nM (14/7) vs. Pen1-JCasp 10 nM (7/4)	0.4514	0.0601 to 0.8426	Yes	*
Pen1-JCasp 100 nM (14/7) vs. Pen1-ScJCasp 1000 nM (7/4)	0.7038	0.3125 to 1.095	Yes	****
Pen1-JCasp 100 nM (14/7) vs. ACSF (9/5)	0.458	0.09691 to 0.8191	Yes	**
Pen1-JCasp 100 nM (14/7) vs. Pen1-JCasp 1000 nM (13/7)	-0.3515	-0.6770 to -0.02594	Yes	*
Pen1-JCasp 10 nM (7/4) vs. Pen1-ScJCasp 1000 nM (7/4)	0.2524	-0.1994 to 0.7042	No	ns
Pen1-JCasp 10 nM (7/4) vs. ACSF (9/5)	0.006667	-0.4193 to 0.4326	No	ns
Pen1-JCasp 10 nM (7/4) vs. Pen1-JCasp 1000 nM (13/7)	-0.8028	-1.199 to -0.4066	Yes	****
Pen1-ScJCasp 1000 nM (7/4) vs. ACSF (9/5)	-0.2458	-0.6717 to 0.1802	No	ns
Pen1-ScJCasp 1000 nM (7/4) vs. Pen1-JCasp 1000 nM (13/7)	-1.055	-1.452 to -0.6590	Yes	****
ACSF (9/5) vs. Pen1-JCasp 1000 nM (13/7)	-0.8095	-1.176 to -0.4430	Yes	****
Interstimuls interval 20 ms
Pen1-JCasp 100 nM (14/7) vs. Pen1-JCasp 10 nM (7/4)	0.5428	0.1515 to 0.9340	Yes	**
Pen1-JCasp 100 nM (14/7) vs. Pen1-ScJCasp 1000 nM (7/4)	0.8185	0.4272 to 1.210	Yes	****
Pen1-JCasp 100 nM (14/7) vs. ACSF (9/5)	0.5788	0.2177 to 0.9400	Yes	***
Pen1-JCasp 100 nM (14/7) vs. Pen1-JCasp 1000 nM (13/7)	-0.4388	-0.7643 to -0.1132	Yes	**
Pen1-JCasp 10 nM (7/4) vs. Pen1-ScJCasp 1000 nM (7/4)	0.2757	-0.1761 to 0.7275	No	ns
Pen1-JCasp 10 nM (7/4) vs. ACSF (9/5)	0.03606	-0.3899 to 0.4620	No	ns
Pen1-JCasp 10 nM (7/4) vs. Pen1-JCasp 1000 nM (13/7)	-0.9816	-1.378 to -0.5853	Yes	****
Pen1-ScJCasp 1000 nM (7/4) vs. ACSF (9/5)	-0.2397	-0.6656 to 0.1863	No	ns
Pen1-ScJCasp 1000 nM (7/4) vs. Pen1-JCasp 1000 nM (13/7)	-1.257	-1.654 to -0.8610	Yes	****
ACSF (9/5) vs. Pen1-JCasp 1000 nM (13/7)	-1.018	-1.384 to -0.6511	Yes	****
Test details	Mean 1	Mean 2	Mean Diff.	SE of diff.	N1	N2	q	DF
Interstimuls interval 500 ms
Pen1-JCasp 100 nM (14/7) vs. Pen1-JCasp 10 nM (7/4)	1.241	1.139	0.1022	0.1423	14	7	1.016	225
Pen1-JCasp 100 nM (14/7) vs. Pen1-ScJCasp 1000 nM (7/4)	1.241	1.148	0.09307	0.1423	14	7	0.9251	225
Pen1-JCasp 100 nM (14/7) vs. ACSF (9/5)	1.241	1.175	0.06626	0.1313	14	9	0.7136	225
Pen1-JCasp 100 nM (14/7) vs. Pen1-JCasp 1000 nM (13/7)	1.241	1.349	-0.1078	0.1184	14	13	1.288	225
Pen1-JCasp 10 nM (7/4) vs. Pen1-ScJCasp 1000 nM (7/4)	1.139	1.148	-0.009143	0.1643	7	7	0.0787	225
Pen1-JCasp 10 nM (7/4) vs. ACSF (9/5)	1.139	1.175	-0.03595	0.1549	7	9	0.3283	225
Pen1-JCasp 10 nM (7/4) vs. Pen1-JCasp 1000 nM (13/7)	1.139	1.349	-0.2101	0.1441	7	13	2.062	225
Pen1-ScJCasp 1000 nM (7/4) vs. ACSF (9/5)	1.148	1.175	-0.02681	0.1549	7	9	0.2448	225
Pen1-ScJCasp 1000 nM (7/4) vs. Pen1-JCasp 1000 nM (13/7)	1.148	1.349	-0.2009	0.1441	7	13	1.972	225
ACSF (9/5) vs. Pen1-JCasp 1000 nM (13/7)	1.175	1.349	-0.1741	0.1333	9	13	1.847	225
Interstimuls interval 200 ms
Pen1-JCasp 100 nM (14/7) vs. Pen1-JCasp 10 nM (7/4)	1.818	1.557	0.2613	0.1423	14	7	2.597	225
Pen1-JCasp 100 nM (14/7) vs. Pen1-ScJCasp 1000 nM (7/4)	1.818	1.432	0.3859	0.1423	14	7	3.835	225
Pen1-JCasp 100 nM (14/7) vs. ACSF (9/5)	1.818	1.523	0.2955	0.1313	14	9	3.182	225
Pen1-JCasp 100 nM (14/7) vs. Pen1-JCasp 1000 nM (13/7)	1.818	1.91	-0.09186	0.1184	14	13	1.097	225
Pen1-JCasp 10 nM (7/4) vs. Pen1-ScJCasp 1000 nM (7/4)	1.557	1.432	0.1246	0.1643	7	7	1.072	225
Pen1-JCasp 10 nM (7/4) vs. ACSF (9/5)	1.557	1.523	0.03419	0.1549	7	9	0.3122	225
Pen1-JCasp 10 nM (7/4) vs. Pen1-JCasp 1000 nM (13/7)	1.557	1.91	-0.3531	0.1441	7	13	3.466	225
Pen1-ScJCasp 1000 nM (7/4) vs. ACSF (9/5)	1.432	1.523	-0.09038	0.1549	7	9	0.8252	225
Pen1-ScJCasp 1000 nM (7/4) vs. Pen1-JCasp 1000 nM (13/7)	1.432	1.91	-0.4777	0.1441	7	13	4.689	225
ACSF (9/5) vs. Pen1-JCasp 1000 nM (13/7)	1.523	1.91	-0.3873	0.1333	9	13	4.11	225
Interstimuls interval 80 ms
Pen1-JCasp 100 nM (14/7) vs. Pen1-JCasp 10 nM (7/4)	2.293	1.938	0.3541	0.1423	14	7	3.519	225
Pen1-JCasp 100 nM (14/7) vs. Pen1-ScJCasp 1000 nM (7/4)	2.293	1.709	0.5834	0.1423	14	7	5.799	225
Pen1-JCasp 100 nM (14/7) vs. ACSF (9/5)	2.293	1.809	0.4834	0.1313	14	9	5.206	225
Pen1-JCasp 100 nM (14/7) vs. Pen1-JCasp 1000 nM (13/7)	2.293	2.618	-0.3254	0.1184	14	13	3.888	225
Pen1-JCasp 10 nM (7/4) vs. Pen1-ScJCasp 1000 nM (7/4)	1.938	1.709	0.2293	0.1643	7	7	1.974	225
Pen1-JCasp 10 nM (7/4) vs. ACSF (9/5)	1.938	1.809	0.1293	0.1549	7	9	1.181	225
Pen1-JCasp 10 nM (7/4) vs. Pen1-JCasp 1000 nM (13/7)	1.938	2.618	-0.6795	0.1441	7	13	6.669	225
Pen1-ScJCasp 1000 nM (7/4) vs. ACSF (9/5)	1.709	1.809	-0.09997	0.1549	7	9	0.9128	225
Pen1-ScJCasp 1000 nM (7/4) vs. Pen1-JCasp 1000 nM (13/7)	1.709	2.618	-0.9088	0.1441	7	13	8.92	225
ACSF (9/5) vs. Pen1-JCasp 1000 nM (13/7)	1.809	2.618	-0.8088	0.1333	9	13	8.583	225
Interstimuls interval 40 ms
Pen1-JCasp 100 nM (14/7) vs. Pen1-JCasp 10 nM (7/4)	2.564	2.113	0.4514	0.1423	14	7	4.487	225
Pen1-JCasp 100 nM (14/7) vs. Pen1-ScJCasp 1000 nM (7/4)	2.564	1.861	0.7038	0.1423	14	7	6.996	225
Pen1-JCasp 100 nM (14/7) vs. ACSF (9/5)	2.564	2.106	0.458	0.1313	14	9	4.933	225
Pen1-JCasp 100 nM (14/7) vs. Pen1-JCasp 1000 nM (13/7)	2.564	2.916	-0.3515	0.1184	14	13	4.199	225
Pen1-JCasp 10 nM (7/4) vs. Pen1-ScJCasp 1000 nM (7/4)	2.113	1.861	0.2524	0.1643	7	7	2.173	225
Pen1-JCasp 10 nM (7/4) vs. ACSF (9/5)	2.113	2.106	0.006667	0.1549	7	9	0.06087	225
Pen1-JCasp 10 nM (7/4) vs. Pen1-JCasp 1000 nM (13/7)	2.113	2.916	-0.8028	0.1441	7	13	7.88	225
Pen1-ScJCasp 1000 nM (7/4) vs. ACSF (9/5)	1.861	2.106	-0.2458	0.1549	7	9	2.244	225
Pen1-ScJCasp 1000 nM (7/4) vs. Pen1-JCasp 1000 nM (13/7)	1.861	2.916	-1.055	0.1441	7	13	10.36	225
ACSF (9/5) vs. Pen1-JCasp 1000 nM (13/7)	2.106	2.916	-0.8095	0.1333	9	13	8.59	225
Interstimuls interval 20 ms
Pen1-JCasp 100 nM (14/7) vs. Pen1-JCasp 10 nM (7/4)	2.738	2.195	0.5428	0.1423	14	7	5.395	225
Pen1-JCasp 100 nM (14/7) vs. Pen1-ScJCasp 1000 nM (7/4)	2.738	1.92	0.8185	0.1423	14	7	8.136	225
Pen1-JCasp 100 nM (14/7) vs. ACSF (9/5)	2.738	2.159	0.5788	0.1313	14	9	6.234	225
Pen1-JCasp 100 nM (14/7) vs. Pen1-JCasp 1000 nM (13/7)	2.738	3.177	-0.4388	0.1184	14	13	5.242	225
Pen1-JCasp 10 nM (7/4) vs. Pen1-ScJCasp 1000 nM (7/4)	2.195	1.92	0.2757	0.1643	7	7	2.373	225
Pen1-JCasp 10 nM (7/4) vs. ACSF (9/5)	2.195	2.159	0.03606	0.1549	7	9	0.3293	225
Pen1-JCasp 10 nM (7/4) vs. Pen1-JCasp 1000 nM (13/7)	2.195	3.177	-0.9816	0.1441	7	13	9.634	225
Pen1-ScJCasp 1000 nM (7/4) vs. ACSF (9/5)	1.92	2.159	-0.2397	0.1549	7	9	2.188	225
Pen1-ScJCasp 1000 nM (7/4) vs. Pen1-JCasp 1000 nM (13/7)	1.92	3.177	-1.257	0.1441	7	13	12.34	225
ACSF (9/5) vs. Pen1-JCasp 1000 nM (13/7)	2.159	3.177	-1.018	0.1333	9	13	10.8	225

## Sheet: main Treatment effect
Compare TREATMENT means (main TREATMENT effect)
Number of families	1
Number of comparisons per family	10
Alpha	0.05
Tukey's multiple comparisons test	Mean Diff.	95% CI of diff.	Significant?	Summary
Pen1-JCasp 100 nM (14/7) vs. Pen1-JCasp 10 nM (7/4)	0.3423	0.04334 to 0.6413	Yes	*
Pen1-JCasp 100 nM (14/7) vs. Pen1-ScJCasp 1000 nM (7/4)	0.5169	0.2179 to 0.8159	Yes	***
Pen1-JCasp 100 nM (14/7) vs. ACSF (9/5)	0.3764	0.1004 to 0.6524	Yes	**
Pen1-JCasp 100 nM (14/7) vs. Pen1-JCasp 1000 nM (13/7)	-0.2631	-0.5119 to -0.01429	Yes	*
Pen1-JCasp 10 nM (7/4) vs. Pen1-ScJCasp 1000 nM (7/4)	0.1746	-0.1707 to 0.5198	No	ns
Pen1-JCasp 10 nM (7/4) vs. ACSF (9/5)	0.03406	-0.2915 to 0.3596	No	ns
Pen1-JCasp 10 nM (7/4) vs. Pen1-JCasp 1000 nM (13/7)	-0.6054	-0.9082 to -0.3026	Yes	****
Pen1-ScJCasp 1000 nM (7/4) vs. ACSF (9/5)	-0.1405	-0.4660 to 0.1850	No	ns
Pen1-ScJCasp 1000 nM (7/4) vs. Pen1-JCasp 1000 nM (13/7)	-0.78	-1.083 to -0.4772	Yes	****
ACSF (9/5) vs. Pen1-JCasp 1000 nM (13/7)	-0.6395	-0.9196 to -0.3594	Yes	****
Test details	Mean 1	Mean 2	Mean Diff.	SE of diff.	N1	N2	q	DF
Pen1-JCasp 100 nM (14/7) vs. Pen1-JCasp 10 nM (7/4)	2.131	1.788	0.3423	0.1052	70	35	4.601	45
Pen1-JCasp 100 nM (14/7) vs. Pen1-ScJCasp 1000 nM (7/4)	2.131	1.614	0.5169	0.1052	70	35	6.947	45
Pen1-JCasp 100 nM (14/7) vs. ACSF (9/5)	2.131	1.754	0.3764	0.09712	70	45	5.481	45
Pen1-JCasp 100 nM (14/7) vs. Pen1-JCasp 1000 nM (13/7)	2.131	2.394	-0.2631	0.08755	70	65	4.249	45
Pen1-JCasp 10 nM (7/4) vs. Pen1-ScJCasp 1000 nM (7/4)	1.788	1.614	0.1746	0.1215	35	35	2.032	45
Pen1-JCasp 10 nM (7/4) vs. ACSF (9/5)	1.788	1.754	0.03406	0.1146	35	45	0.4204	45
Pen1-JCasp 10 nM (7/4) vs. Pen1-JCasp 1000 nM (13/7)	1.788	2.394	-0.6054	0.1066	35	65	8.034	45
Pen1-ScJCasp 1000 nM (7/4) vs. ACSF (9/5)	1.614	1.754	-0.1405	0.1146	35	45	1.735	45
Pen1-ScJCasp 1000 nM (7/4) vs. Pen1-JCasp 1000 nM (13/7)	1.614	2.394	-0.78	0.1066	35	65	10.35	45
ACSF (9/5) vs. Pen1-JCasp 1000 nM (13/7)	1.754	2.394	-0.6395	0.09857	45	65	9.175	45
