# Supplementary material for: APP and APLP2 interact with the synaptic release machinery and facilitate transmitter release at hippocampal synapses
Source: eLife. 2015 Nov 9;4:e09743. doi: 10.7554/eLife.09743 (PMC4755753; doi:10.7554/eLife.09743)
Supplement: Figure 3—source data 3. — DOI: http://dx.doi.org/10.7554/eLife.09743.009 [file elife-09743-fig3-data3.xlsx]

## Sheet: 2way ANOVA of 1hz train
Table Analyzed	Train 10
Two-way RM ANOVA	Matching: Stacked
Alpha	0.05
Source of Variation	% of total variation	P value	P value summary	Significant?
Interaction	0.9768	0.1481	ns	No
stimulus	0.9188	0.004	**	Yes
treatment	23.41	0.0082	**	Yes
Subjects (matching)	67.3	< 0.0001	****	Yes
ANOVA table	SS	DF	MS	F (DFn, DFd)	P value
Interaction	982.7	8	122.8	F (8, 90) = 1.560	P = 0.1481
stimulus	924.4	2	462.2	F (2, 90) = 5.870	P = 0.0040
treatment	23554	4	5888	F (4, 45) = 3.913	P = 0.0082
Subjects (matching)	67712	45	1505	F (45, 90) = 19.11	P < 0.0001
Residual	7086	90	78.73
Number of missing values	0

## Sheet: Tukey's mult. comp. test
Within each row, compare treatments (simple effects within rows)
Number of families	3
Number of comparisons per family	10
Alpha	0.05
Tukey's multiple comparisons test	Mean Diff.	95% CI of diff.	Significant?	Summary
fEPSP8/fEPSP1
Pen1-JCasp 100 nM (14/7) vs. Pen1-JCasp 10 nM (7/4)	17.56	-12.56 to 47.69	No	ns
Pen1-JCasp 100 nM (14/7) vs. ACSF (9/5)	7.779	-20.03 to 35.59	No	ns
Pen1-JCasp 100 nM (14/7) vs. Pen1-JCasp 1000 nM (13/7)	-4.242	-29.31 to 20.83	No	ns
Pen1-JCasp 100 nM (14/7) vs. Pen1-SCJCasp 1000 nM (7/4)	25	-5.130 to 55.13	No	ns
Pen1-JCasp 10 nM (7/4) vs. ACSF (9/5)	-9.785	-42.58 to 23.01	No	ns
Pen1-JCasp 10 nM (7/4) vs. Pen1-JCasp 1000 nM (13/7)	-21.81	-52.32 to 8.706	No	ns
Pen1-JCasp 10 nM (7/4) vs. Pen1-SCJCasp 1000 nM (7/4)	7.435	-27.35 to 42.22	No	ns
ACSF (9/5) vs. Pen1-JCasp 1000 nM (13/7)	-12.02	-40.24 to 16.20	No	ns
ACSF (9/5) vs. Pen1-SCJCasp 1000 nM (7/4)	17.22	-15.58 to 50.02	No	ns
Pen1-JCasp 1000 nM (13/7) vs. Pen1-SCJCasp 1000 nM (7/4)	29.24	-1.271 to 59.75	No	ns
fEPSP9/fEPSP1
Pen1-JCasp 100 nM (14/7) vs. Pen1-JCasp 10 nM (7/4)	17.85	-12.28 to 47.98	No	ns
Pen1-JCasp 100 nM (14/7) vs. ACSF (9/5)	7.888	-19.92 to 35.69	No	ns
Pen1-JCasp 100 nM (14/7) vs. Pen1-JCasp 1000 nM (13/7)	-12.46	-37.53 to 12.61	No	ns
Pen1-JCasp 100 nM (14/7) vs. Pen1-SCJCasp 1000 nM (7/4)	24.08	-6.049 to 54.21	No	ns
Pen1-JCasp 10 nM (7/4) vs. ACSF (9/5)	-9.959	-42.76 to 22.84	No	ns
Pen1-JCasp 10 nM (7/4) vs. Pen1-JCasp 1000 nM (13/7)	-30.3	-60.82 to 0.2072	No	ns
Pen1-JCasp 10 nM (7/4) vs. Pen1-SCJCasp 1000 nM (7/4)	6.232	-28.56 to 41.02	No	ns
ACSF (9/5) vs. Pen1-JCasp 1000 nM (13/7)	-20.35	-48.57 to 7.877	No	ns
ACSF (9/5) vs. Pen1-SCJCasp 1000 nM (7/4)	16.19	-16.61 to 48.99	No	ns
Pen1-JCasp 1000 nM (13/7) vs. Pen1-SCJCasp 1000 nM (7/4)	36.54	6.025 to 67.05	Yes	*
fEPSP10/fEPSP1
Pen1-JCasp 100 nM (14/7) vs. Pen1-JCasp 10 nM (7/4)	19.12	-11.01 to 49.25	No	ns
Pen1-JCasp 100 nM (14/7) vs. ACSF (9/5)	8.481	-19.33 to 36.29	No	ns
Pen1-JCasp 100 nM (14/7) vs. Pen1-JCasp 1000 nM (13/7)	-18.08	-43.15 to 6.986	No	ns
Pen1-JCasp 100 nM (14/7) vs. Pen1-SCJCasp 1000 nM (7/4)	24.19	-5.937 to 54.32	No	ns
Pen1-JCasp 10 nM (7/4) vs. ACSF (9/5)	-10.64	-43.44 to 22.16	No	ns
Pen1-JCasp 10 nM (7/4) vs. Pen1-JCasp 1000 nM (13/7)	-37.2	-67.71 to -6.690	Yes	**
Pen1-JCasp 10 nM (7/4) vs. Pen1-SCJCasp 1000 nM (7/4)	5.071	-29.72 to 39.86	No	ns
ACSF (9/5) vs. Pen1-JCasp 1000 nM (13/7)	-26.56	-54.79 to 1.659	No	ns
ACSF (9/5) vs. Pen1-SCJCasp 1000 nM (7/4)	15.71	-17.09 to 48.51	No	ns
Pen1-JCasp 1000 nM (13/7) vs. Pen1-SCJCasp 1000 nM (7/4)	42.27	11.76 to 72.78	Yes	**
Test details	Mean 1	Mean 2	Mean Diff.	SE of diff.	N1	N2	q	DF
fEPSP8/fEPSP1
Pen1-JCasp 100 nM (14/7) vs. Pen1-JCasp 10 nM (7/4)	151.6	134	17.56	10.9	14	7	2.28	135
Pen1-JCasp 100 nM (14/7) vs. ACSF (9/5)	151.6	143.8	7.779	10.06	14	9	1.094	135
Pen1-JCasp 100 nM (14/7) vs. Pen1-JCasp 1000 nM (13/7)	151.6	155.8	-4.242	9.066	14	13	0.6617	135
Pen1-JCasp 100 nM (14/7) vs. Pen1-SCJCasp 1000 nM (7/4)	151.6	126.6	25	10.9	14	7	3.245	135
Pen1-JCasp 10 nM (7/4) vs. ACSF (9/5)	134	143.8	-9.785	11.86	7	9	1.167	135
Pen1-JCasp 10 nM (7/4) vs. Pen1-JCasp 1000 nM (13/7)	134	155.8	-21.81	11.04	7	13	2.795	135
Pen1-JCasp 10 nM (7/4) vs. Pen1-SCJCasp 1000 nM (7/4)	134	126.6	7.435	12.58	7	7	0.8357	135
ACSF (9/5) vs. Pen1-JCasp 1000 nM (13/7)	143.8	155.8	-12.02	10.21	9	13	1.666	135
ACSF (9/5) vs. Pen1-SCJCasp 1000 nM (7/4)	143.8	126.6	17.22	11.86	9	7	2.053	135
Pen1-JCasp 1000 nM (13/7) vs. Pen1-SCJCasp 1000 nM (7/4)	155.8	126.6	29.24	11.04	13	7	3.747	135
fEPSP9/fEPSP1
Pen1-JCasp 100 nM (14/7) vs. Pen1-JCasp 10 nM (7/4)	150.1	132.2	17.85	10.9	14	7	2.316	135
Pen1-JCasp 100 nM (14/7) vs. ACSF (9/5)	150.1	142.2	7.888	10.06	14	9	1.109	135
Pen1-JCasp 100 nM (14/7) vs. Pen1-JCasp 1000 nM (13/7)	150.1	162.5	-12.46	9.066	14	13	1.943	135
Pen1-JCasp 100 nM (14/7) vs. Pen1-SCJCasp 1000 nM (7/4)	150.1	126	24.08	10.9	14	7	3.125	135
Pen1-JCasp 10 nM (7/4) vs. ACSF (9/5)	132.2	142.2	-9.959	11.86	7	9	1.187	135
Pen1-JCasp 10 nM (7/4) vs. Pen1-JCasp 1000 nM (13/7)	132.2	162.5	-30.3	11.04	7	13	3.884	135
Pen1-JCasp 10 nM (7/4) vs. Pen1-SCJCasp 1000 nM (7/4)	132.2	126	6.232	12.58	7	7	0.7005	135
ACSF (9/5) vs. Pen1-JCasp 1000 nM (13/7)	142.2	162.5	-20.35	10.21	9	13	2.819	135
ACSF (9/5) vs. Pen1-SCJCasp 1000 nM (7/4)	142.2	126	16.19	11.86	9	7	1.93	135
Pen1-JCasp 1000 nM (13/7) vs. Pen1-SCJCasp 1000 nM (7/4)	162.5	126	36.54	11.04	13	7	4.682	135
fEPSP10/fEPSP1
Pen1-JCasp 100 nM (14/7) vs. Pen1-JCasp 10 nM (7/4)	154.7	135.6	19.12	10.9	14	7	2.482	135
Pen1-JCasp 100 nM (14/7) vs. ACSF (9/5)	154.7	146.2	8.481	10.06	14	9	1.193	135
Pen1-JCasp 100 nM (14/7) vs. Pen1-JCasp 1000 nM (13/7)	154.7	172.8	-18.08	9.066	14	13	2.821	135
Pen1-JCasp 100 nM (14/7) vs. Pen1-SCJCasp 1000 nM (7/4)	154.7	130.5	24.19	10.9	14	7	3.14	135
Pen1-JCasp 10 nM (7/4) vs. ACSF (9/5)	135.6	146.2	-10.64	11.86	7	9	1.268	135
Pen1-JCasp 10 nM (7/4) vs. Pen1-JCasp 1000 nM (13/7)	135.6	172.8	-37.2	11.04	7	13	4.768	135
Pen1-JCasp 10 nM (7/4) vs. Pen1-SCJCasp 1000 nM (7/4)	135.6	130.5	5.071	12.58	7	7	0.57	135
ACSF (9/5) vs. Pen1-JCasp 1000 nM (13/7)	146.2	172.8	-26.56	10.21	9	13	3.68	135
ACSF (9/5) vs. Pen1-SCJCasp 1000 nM (7/4)	146.2	130.5	15.71	11.86	9	7	1.873	135
Pen1-JCasp 1000 nM (13/7) vs. Pen1-SCJCasp 1000 nM (7/4)	172.8	130.5	42.27	11.04	13	7	5.418	135

## Sheet: main Treatment effect
Compare TREATMENT means (main TREATMENT effect)
Number of families	1
Number of comparisons per family	10
Alpha	0.05
Tukey's multiple comparisons test	Mean Diff.	95% CI of diff.	Significant?	Summary
Pen1-JCasp 100 nM (14/7) vs. Pen1-JCasp 10 nM (7/4)	18.18	-11.28 to 47.63	No	ns
Pen1-JCasp 100 nM (14/7) vs. ACSF (9/5)	8.049	-19.14 to 35.24	No	ns
Pen1-JCasp 100 nM (14/7) vs. Pen1-JCasp 1000 nM (13/7)	-11.59	-36.10 to 12.92	No	ns
Pen1-JCasp 100 nM (14/7) vs. Pen1-SCJCasp 1000 nM (7/4)	24.42	-5.035 to 53.88	No	ns
Pen1-JCasp 10 nM (7/4) vs. ACSF (9/5)	-10.13	-42.20 to 21.94	No	ns
Pen1-JCasp 10 nM (7/4) vs. Pen1-JCasp 1000 nM (13/7)	-29.77	-59.60 to 0.06271	No	ns
Pen1-JCasp 10 nM (7/4) vs. Pen1-SCJCasp 1000 nM (7/4)	6.246	-27.77 to 40.26	No	ns
ACSF (9/5) vs. Pen1-JCasp 1000 nM (13/7)	-19.64	-47.24 to 7.951	No	ns
ACSF (9/5) vs. Pen1-SCJCasp 1000 nM (7/4)	16.37	-15.70 to 48.44	No	ns
Pen1-JCasp 1000 nM (13/7) vs. Pen1-SCJCasp 1000 nM (7/4)	36.02	6.183 to 65.85	Yes	*
Test details	Mean 1	Mean 2	Mean Diff.	SE of diff.	N1	N2	q	DF
Pen1-JCasp 100 nM (14/7) vs. Pen1-JCasp 10 nM (7/4)	152.1	133.9	18.18	10.37	42	21	2.48	45
Pen1-JCasp 100 nM (14/7) vs. ACSF (9/5)	152.1	144.1	8.049	9.569	42	27	1.19	45
Pen1-JCasp 100 nM (14/7) vs. Pen1-JCasp 1000 nM (13/7)	152.1	163.7	-11.59	8.626	42	39	1.901	45
Pen1-JCasp 100 nM (14/7) vs. Pen1-SCJCasp 1000 nM (7/4)	152.1	127.7	24.42	10.37	42	21	3.332	45
Pen1-JCasp 10 nM (7/4) vs. ACSF (9/5)	133.9	144.1	-10.13	11.29	21	27	1.269	45
Pen1-JCasp 10 nM (7/4) vs. Pen1-JCasp 1000 nM (13/7)	133.9	163.7	-29.77	10.5	21	39	4.01	45
Pen1-JCasp 10 nM (7/4) vs. Pen1-SCJCasp 1000 nM (7/4)	133.9	127.7	6.246	11.97	21	21	0.7379	45
ACSF (9/5) vs. Pen1-JCasp 1000 nM (13/7)	144.1	163.7	-19.64	9.711	27	39	2.86	45
ACSF (9/5) vs. Pen1-SCJCasp 1000 nM (7/4)	144.1	127.7	16.37	11.29	27	21	2.052	45
Pen1-JCasp 1000 nM (13/7) vs. Pen1-SCJCasp 1000 nM (7/4)	163.7	127.7	36.02	10.5	39	21	4.851	45
