# Supplementary material for: APP and APLP2 interact with the synaptic release machinery and facilitate transmitter release at hippocampal synapses
Source: eLife. 2015 Nov 9;4:e09743. doi: 10.7554/eLife.09743 (PMC4755753; doi:10.7554/eLife.09743)
Supplement: Figure 3—source data 4. — DOI: http://dx.doi.org/10.7554/eLife.09743.010 [file elife-09743-fig3-data4.xlsx]

## Sheet: 2way ANOVA of 5hz train
Table Analyzed	Train 10
Two-way RM ANOVA	Matching: Stacked
Alpha	0.05
Source of Variation	% of total variation	P value	P value summary	Significant?
Interaction	0.06589	0.9754	ns	No
STimulation	0.05092	0.4432	ns	No
treatment	42.69	< 0.0001	****	Yes
Subjects (matching)	54.39	< 0.0001	****	Yes
ANOVA table	SS	DF	MS	F (DFn, DFd)	P value
Interaction	170.5	8	21.31	F (8, 90) = 0.2656	P = 0.9754
STimulation	131.8	2	65.89	F (2, 90) = 0.8211	P = 0.4432
treatment	110475	4	27619	F (4, 45) = 8.831	P < 0.0001
Subjects (matching)	140742	45	3128	F (45, 90) = 38.98	P < 0.0001
Residual	7222	90	80.24
Number of missing values	0

## Sheet: Tukey's mult. comp. test
Within each row, compare columns (simple effects within rows)
Number of families	9
Number of comparisons per family	10
Alpha	0.05
Tukey's multiple comparisons test	Mean Diff.	95% CI of diff.	Significant?	Summary
Row 2
Pen1-JCasp 100 nM (14/7) vs. Pen1-JCasp 10 nM (7/4)	18.46	-18.77 to 55.70	No	ns
Pen1-JCasp 100 nM (14/7) vs. ACSF (9/5)	22.1	-12.26 to 56.47	No	ns
Pen1-JCasp 100 nM (14/7) vs. Pen1-JCasp 1000 nM (13/7)	-13.56	-44.55 to 17.42	No	ns
Pen1-JCasp 100 nM (14/7) vs. Pen1-SCJCasp 1000 nM (7/4)	13.4	-23.83 to 50.64	No	ns
Pen1-JCasp 10 nM (7/4) vs. ACSF (9/5)	3.64	-36.90 to 44.18	No	ns
Pen1-JCasp 10 nM (7/4) vs. Pen1-JCasp 1000 nM (13/7)	-32.03	-69.74 to 5.681	No	ns
Pen1-JCasp 10 nM (7/4) vs. Pen1-SCJCasp 1000 nM (7/4)	-5.06	-48.05 to 37.93	No	ns
ACSF (9/5) vs. Pen1-JCasp 1000 nM (13/7)	-35.67	-70.55 to -0.7889	Yes	*
ACSF (9/5) vs. Pen1-SCJCasp 1000 nM (7/4)	-8.7	-49.24 to 31.84	No	ns
Pen1-JCasp 1000 nM (13/7) vs. Pen1-SCJCasp 1000 nM (7/4)	26.97	-10.74 to 64.68	No	ns
Row 3
Pen1-JCasp 100 nM (14/7) vs. Pen1-JCasp 10 nM (7/4)	18	-19.24 to 55.23	No	ns
Pen1-JCasp 100 nM (14/7) vs. ACSF (9/5)	22.48	-11.89 to 56.84	No	ns
Pen1-JCasp 100 nM (14/7) vs. Pen1-JCasp 1000 nM (13/7)	-27.9	-58.88 to 3.083	No	ns
Pen1-JCasp 100 nM (14/7) vs. Pen1-SCJCasp 1000 nM (7/4)	24.07	-13.16 to 61.31	No	ns
Pen1-JCasp 10 nM (7/4) vs. ACSF (9/5)	4.482	-36.05 to 45.02	No	ns
Pen1-JCasp 10 nM (7/4) vs. Pen1-JCasp 1000 nM (13/7)	-45.89	-83.60 to -8.185	Yes	**
Pen1-JCasp 10 nM (7/4) vs. Pen1-SCJCasp 1000 nM (7/4)	6.078	-36.92 to 49.07	No	ns
ACSF (9/5) vs. Pen1-JCasp 1000 nM (13/7)	-50.38	-85.25 to -15.50	Yes	***
ACSF (9/5) vs. Pen1-SCJCasp 1000 nM (7/4)	1.596	-38.94 to 42.13	No	ns
Pen1-JCasp 1000 nM (13/7) vs. Pen1-SCJCasp 1000 nM (7/4)	51.97	14.26 to 89.68	Yes	**
Row 4
Pen1-JCasp 100 nM (14/7) vs. Pen1-JCasp 10 nM (7/4)	27.56	-9.679 to 64.79	No	ns
Pen1-JCasp 100 nM (14/7) vs. ACSF (9/5)	20.92	-13.44 to 55.29	No	ns
Pen1-JCasp 100 nM (14/7) vs. Pen1-JCasp 1000 nM (13/7)	-37.07	-68.05 to -6.093	Yes	**
Pen1-JCasp 100 nM (14/7) vs. Pen1-SCJCasp 1000 nM (7/4)	33.04	-4.192 to 70.28	No	ns
Pen1-JCasp 10 nM (7/4) vs. ACSF (9/5)	-6.634	-47.17 to 33.90	No	ns
Pen1-JCasp 10 nM (7/4) vs. Pen1-JCasp 1000 nM (13/7)	-64.63	-102.3 to -26.92	Yes	****
Pen1-JCasp 10 nM (7/4) vs. Pen1-SCJCasp 1000 nM (7/4)	5.487	-37.51 to 48.48	No	ns
ACSF (9/5) vs. Pen1-JCasp 1000 nM (13/7)	-57.99	-92.87 to -23.12	Yes	****
ACSF (9/5) vs. Pen1-SCJCasp 1000 nM (7/4)	12.12	-28.41 to 52.66	No	ns
Pen1-JCasp 1000 nM (13/7) vs. Pen1-SCJCasp 1000 nM (7/4)	70.12	32.41 to 107.8	Yes	****
Row 5
Pen1-JCasp 100 nM (14/7) vs. Pen1-JCasp 10 nM (7/4)	24.4	-12.83 to 61.64	No	ns
Pen1-JCasp 100 nM (14/7) vs. ACSF (9/5)	24.31	-10.06 to 58.68	No	ns
Pen1-JCasp 100 nM (14/7) vs. Pen1-JCasp 1000 nM (13/7)	-34.45	-65.43 to -3.472	Yes	*
Pen1-JCasp 100 nM (14/7) vs. Pen1-SCJCasp 1000 nM (7/4)	32.67	-4.561 to 69.91	No	ns
Pen1-JCasp 10 nM (7/4) vs. ACSF (9/5)	-0.09241	-40.63 to 40.44	No	ns
Pen1-JCasp 10 nM (7/4) vs. Pen1-JCasp 1000 nM (13/7)	-58.85	-96.56 to -21.15	Yes	***
Pen1-JCasp 10 nM (7/4) vs. Pen1-SCJCasp 1000 nM (7/4)	8.271	-34.72 to 51.26	No	ns
ACSF (9/5) vs. Pen1-JCasp 1000 nM (13/7)	-58.76	-93.64 to -23.88	Yes	****
ACSF (9/5) vs. Pen1-SCJCasp 1000 nM (7/4)	8.363	-32.17 to 48.90	No	ns
Pen1-JCasp 1000 nM (13/7) vs. Pen1-SCJCasp 1000 nM (7/4)	67.13	29.42 to 104.8	Yes	****
Row 6
Pen1-JCasp 100 nM (14/7) vs. Pen1-JCasp 10 nM (7/4)	27.07	-10.17 to 64.30	No	ns
Pen1-JCasp 100 nM (14/7) vs. ACSF (9/5)	25.96	-8.406 to 60.33	No	ns
Pen1-JCasp 100 nM (14/7) vs. Pen1-JCasp 1000 nM (13/7)	-39.85	-70.83 to -8.872	Yes	**
Pen1-JCasp 100 nM (14/7) vs. Pen1-SCJCasp 1000 nM (7/4)	33.65	-3.582 to 70.89	No	ns
Pen1-JCasp 10 nM (7/4) vs. ACSF (9/5)	-1.109	-41.64 to 39.43	No	ns
Pen1-JCasp 10 nM (7/4) vs. Pen1-JCasp 1000 nM (13/7)	-66.92	-104.6 to -29.21	Yes	****
Pen1-JCasp 10 nM (7/4) vs. Pen1-SCJCasp 1000 nM (7/4)	6.583	-36.41 to 49.58	No	ns
ACSF (9/5) vs. Pen1-JCasp 1000 nM (13/7)	-65.81	-100.7 to -30.93	Yes	****
ACSF (9/5) vs. Pen1-SCJCasp 1000 nM (7/4)	7.692	-32.84 to 48.23	No	ns
Pen1-JCasp 1000 nM (13/7) vs. Pen1-SCJCasp 1000 nM (7/4)	73.5	35.80 to 111.2	Yes	****
Row 7
Pen1-JCasp 100 nM (14/7) vs. Pen1-JCasp 10 nM (7/4)	26.07	-11.16 to 63.30	No	ns
Pen1-JCasp 100 nM (14/7) vs. ACSF (9/5)	29.04	-5.330 to 63.40	No	ns
Pen1-JCasp 100 nM (14/7) vs. Pen1-JCasp 1000 nM (13/7)	-36.16	-67.14 to -5.177	Yes	*
Pen1-JCasp 100 nM (14/7) vs. Pen1-SCJCasp 1000 nM (7/4)	37.22	-0.01176 to 74.46	No	ns
Pen1-JCasp 10 nM (7/4) vs. ACSF (9/5)	2.965	-37.57 to 43.50	No	ns
Pen1-JCasp 10 nM (7/4) vs. Pen1-JCasp 1000 nM (13/7)	-62.23	-99.94 to -24.52	Yes	****
Pen1-JCasp 10 nM (7/4) vs. Pen1-SCJCasp 1000 nM (7/4)	11.15	-31.84 to 54.15	No	ns
ACSF (9/5) vs. Pen1-JCasp 1000 nM (13/7)	-65.19	-100.1 to -30.31	Yes	****
ACSF (9/5) vs. Pen1-SCJCasp 1000 nM (7/4)	8.187	-32.35 to 48.72	No	ns
Pen1-JCasp 1000 nM (13/7) vs. Pen1-SCJCasp 1000 nM (7/4)	73.38	35.67 to 111.1	Yes	****
Row 8
Pen1-JCasp 100 nM (14/7) vs. Pen1-JCasp 10 nM (7/4)	32.48	-4.757 to 69.71	No	ns
Pen1-JCasp 100 nM (14/7) vs. ACSF (9/5)	28.42	-5.950 to 62.78	No	ns
Pen1-JCasp 100 nM (14/7) vs. Pen1-JCasp 1000 nM (13/7)	-33.64	-64.62 to -2.655	Yes	*
Pen1-JCasp 100 nM (14/7) vs. Pen1-SCJCasp 1000 nM (7/4)	33.09	-4.143 to 70.32	No	ns
Pen1-JCasp 10 nM (7/4) vs. ACSF (9/5)	-4.062	-44.60 to 36.47	No	ns
Pen1-JCasp 10 nM (7/4) vs. Pen1-JCasp 1000 nM (13/7)	-66.11	-103.8 to -28.40	Yes	****
Pen1-JCasp 10 nM (7/4) vs. Pen1-SCJCasp 1000 nM (7/4)	0.6133	-42.38 to 43.61	No	ns
ACSF (9/5) vs. Pen1-JCasp 1000 nM (13/7)	-62.05	-96.93 to -27.17	Yes	****
ACSF (9/5) vs. Pen1-SCJCasp 1000 nM (7/4)	4.675	-35.86 to 45.21	No	ns
Pen1-JCasp 1000 nM (13/7) vs. Pen1-SCJCasp 1000 nM (7/4)	66.73	29.02 to 104.4	Yes	****
Row 9
Pen1-JCasp 100 nM (14/7) vs. Pen1-JCasp 10 nM (7/4)	30.68	-6.551 to 67.92	No	ns
Pen1-JCasp 100 nM (14/7) vs. ACSF (9/5)	28.22	-6.144 to 62.59	No	ns
Pen1-JCasp 100 nM (14/7) vs. Pen1-JCasp 1000 nM (13/7)	-33.4	-64.38 to -2.421	Yes	*
Pen1-JCasp 100 nM (14/7) vs. Pen1-SCJCasp 1000 nM (7/4)	34.1	-3.131 to 71.34	No	ns
Pen1-JCasp 10 nM (7/4) vs. ACSF (9/5)	-2.461	-43.00 to 38.07	No	ns
Pen1-JCasp 10 nM (7/4) vs. Pen1-JCasp 1000 nM (13/7)	-64.08	-101.8 to -26.38	Yes	****
Pen1-JCasp 10 nM (7/4) vs. Pen1-SCJCasp 1000 nM (7/4)	3.42	-39.57 to 46.41	No	ns
ACSF (9/5) vs. Pen1-JCasp 1000 nM (13/7)	-61.62	-96.50 to -26.74	Yes	****
ACSF (9/5) vs. Pen1-SCJCasp 1000 nM (7/4)	5.881	-34.65 to 46.42	No	ns
Pen1-JCasp 1000 nM (13/7) vs. Pen1-SCJCasp 1000 nM (7/4)	67.5	29.80 to 105.2	Yes	****
Row 10
Pen1-JCasp 100 nM (14/7) vs. Pen1-JCasp 10 nM (7/4)	31.68	-5.555 to 68.91	No	ns
Pen1-JCasp 100 nM (14/7) vs. ACSF (9/5)	29.23	-5.134 to 63.60	No	ns
Pen1-JCasp 100 nM (14/7) vs. Pen1-JCasp 1000 nM (13/7)	-36.18	-67.16 to -5.201	Yes	*
Pen1-JCasp 100 nM (14/7) vs. Pen1-SCJCasp 1000 nM (7/4)	37.97	0.7317 to 75.20	Yes	*
Pen1-JCasp 10 nM (7/4) vs. ACSF (9/5)	-2.447	-42.98 to 38.09	No	ns
Pen1-JCasp 10 nM (7/4) vs. Pen1-JCasp 1000 nM (13/7)	-67.86	-105.6 to -30.15	Yes	****
Pen1-JCasp 10 nM (7/4) vs. Pen1-SCJCasp 1000 nM (7/4)	6.287	-36.71 to 49.28	No	ns
ACSF (9/5) vs. Pen1-JCasp 1000 nM (13/7)	-65.41	-100.3 to -30.53	Yes	****
ACSF (9/5) vs. Pen1-SCJCasp 1000 nM (7/4)	8.734	-31.80 to 49.27	No	ns
Pen1-JCasp 1000 nM (13/7) vs. Pen1-SCJCasp 1000 nM (7/4)	74.15	36.44 to 111.9	Yes	****
Test details	Mean 1	Mean 2	Mean Diff.	SE of diff.	N1	N2	q	DF
Row 2
Pen1-JCasp 100 nM (14/7) vs. Pen1-JCasp 10 nM (7/4)	151.4	132.9	18.46	13.59	14	7	1.922	405
Pen1-JCasp 100 nM (14/7) vs. ACSF (9/5)	151.4	129.3	22.1	12.54	14	9	2.492	405
Pen1-JCasp 100 nM (14/7) vs. Pen1-JCasp 1000 nM (13/7)	151.4	164.9	-13.56	11.31	14	13	1.697	405
Pen1-JCasp 100 nM (14/7) vs. Pen1-SCJCasp 1000 nM (7/4)	151.4	138	13.4	13.59	14	7	1.395	405
Pen1-JCasp 10 nM (7/4) vs. ACSF (9/5)	132.9	129.3	3.64	14.79	7	9	0.348	405
Pen1-JCasp 10 nM (7/4) vs. Pen1-JCasp 1000 nM (13/7)	132.9	164.9	-32.03	13.76	7	13	3.291	405
Pen1-JCasp 10 nM (7/4) vs. Pen1-SCJCasp 1000 nM (7/4)	132.9	138	-5.06	15.69	7	7	0.4561	405
ACSF (9/5) vs. Pen1-JCasp 1000 nM (13/7)	129.3	164.9	-35.67	12.73	9	13	3.963	405
ACSF (9/5) vs. Pen1-SCJCasp 1000 nM (7/4)	129.3	138	-8.7	14.79	9	7	0.8317	405
Pen1-JCasp 1000 nM (13/7) vs. Pen1-SCJCasp 1000 nM (7/4)	164.9	138	26.97	13.76	13	7	2.771	405
Row 3
Pen1-JCasp 100 nM (14/7) vs. Pen1-JCasp 10 nM (7/4)	154.9	136.9	18	13.59	14	7	1.873	405
Pen1-JCasp 100 nM (14/7) vs. ACSF (9/5)	154.9	132.4	22.48	12.54	14	9	2.535	405
Pen1-JCasp 100 nM (14/7) vs. Pen1-JCasp 1000 nM (13/7)	154.9	182.8	-27.9	11.31	14	13	3.489	405
Pen1-JCasp 100 nM (14/7) vs. Pen1-SCJCasp 1000 nM (7/4)	154.9	130.8	24.07	13.59	14	7	2.505	405
Pen1-JCasp 10 nM (7/4) vs. ACSF (9/5)	136.9	132.4	4.482	14.79	7	9	0.4285	405
Pen1-JCasp 10 nM (7/4) vs. Pen1-JCasp 1000 nM (13/7)	136.9	182.8	-45.89	13.76	7	13	4.716	405
Pen1-JCasp 10 nM (7/4) vs. Pen1-SCJCasp 1000 nM (7/4)	136.9	130.8	6.078	15.69	7	7	0.5478	405
ACSF (9/5) vs. Pen1-JCasp 1000 nM (13/7)	132.4	182.8	-50.38	12.73	9	13	5.597	405
ACSF (9/5) vs. Pen1-SCJCasp 1000 nM (7/4)	132.4	130.8	1.596	14.79	9	7	0.1525	405
Pen1-JCasp 1000 nM (13/7) vs. Pen1-SCJCasp 1000 nM (7/4)	182.8	130.8	51.97	13.76	13	7	5.341	405
Row 4
Pen1-JCasp 100 nM (14/7) vs. Pen1-JCasp 10 nM (7/4)	153.9	126.3	27.56	13.59	14	7	2.868	405
Pen1-JCasp 100 nM (14/7) vs. ACSF (9/5)	153.9	133	20.92	12.54	14	9	2.359	405
Pen1-JCasp 100 nM (14/7) vs. Pen1-JCasp 1000 nM (13/7)	153.9	191	-37.07	11.31	14	13	4.637	405
Pen1-JCasp 100 nM (14/7) vs. Pen1-SCJCasp 1000 nM (7/4)	153.9	120.9	33.04	13.59	14	7	3.439	405
Pen1-JCasp 10 nM (7/4) vs. ACSF (9/5)	126.3	133	-6.634	14.79	7	9	0.6342	405
Pen1-JCasp 10 nM (7/4) vs. Pen1-JCasp 1000 nM (13/7)	126.3	191	-64.63	13.76	7	13	6.642	405
Pen1-JCasp 10 nM (7/4) vs. Pen1-SCJCasp 1000 nM (7/4)	126.3	120.9	5.487	15.69	7	7	0.4945	405
ACSF (9/5) vs. Pen1-JCasp 1000 nM (13/7)	133	191	-57.99	12.73	9	13	6.443	405
ACSF (9/5) vs. Pen1-SCJCasp 1000 nM (7/4)	133	120.9	12.12	14.79	9	7	1.159	405
Pen1-JCasp 1000 nM (13/7) vs. Pen1-SCJCasp 1000 nM (7/4)	191	120.9	70.12	13.76	13	7	7.205	405
Row 5
Pen1-JCasp 100 nM (14/7) vs. Pen1-JCasp 10 nM (7/4)	155.6	131.2	24.4	13.59	14	7	2.54	405
Pen1-JCasp 100 nM (14/7) vs. ACSF (9/5)	155.6	131.3	24.31	12.54	14	9	2.741	405
Pen1-JCasp 100 nM (14/7) vs. Pen1-JCasp 1000 nM (13/7)	155.6	190.1	-34.45	11.31	14	13	4.309	405
Pen1-JCasp 100 nM (14/7) vs. Pen1-SCJCasp 1000 nM (7/4)	155.6	122.9	32.67	13.59	14	7	3.4	405
Pen1-JCasp 10 nM (7/4) vs. ACSF (9/5)	131.2	131.3	-0.09241	14.79	7	9	0.008835	405
Pen1-JCasp 10 nM (7/4) vs. Pen1-JCasp 1000 nM (13/7)	131.2	190.1	-58.85	13.76	7	13	6.048	405
Pen1-JCasp 10 nM (7/4) vs. Pen1-SCJCasp 1000 nM (7/4)	131.2	122.9	8.271	15.69	7	7	0.7454	405
ACSF (9/5) vs. Pen1-JCasp 1000 nM (13/7)	131.3	190.1	-58.76	12.73	9	13	6.529	405
ACSF (9/5) vs. Pen1-SCJCasp 1000 nM (7/4)	131.3	122.9	8.363	14.79	9	7	0.7995	405
Pen1-JCasp 1000 nM (13/7) vs. Pen1-SCJCasp 1000 nM (7/4)	190.1	122.9	67.13	13.76	13	7	6.898	405
Row 6
Pen1-JCasp 100 nM (14/7) vs. Pen1-JCasp 10 nM (7/4)	154.7	127.6	27.07	13.59	14	7	2.817	405
Pen1-JCasp 100 nM (14/7) vs. ACSF (9/5)	154.7	128.7	25.96	12.54	14	9	2.927	405
Pen1-JCasp 100 nM (14/7) vs. Pen1-JCasp 1000 nM (13/7)	154.7	194.5	-39.85	11.31	14	13	4.985	405
Pen1-JCasp 100 nM (14/7) vs. Pen1-SCJCasp 1000 nM (7/4)	154.7	121	33.65	13.59	14	7	3.502	405
Pen1-JCasp 10 nM (7/4) vs. ACSF (9/5)	127.6	128.7	-1.109	14.79	7	9	0.106	405
Pen1-JCasp 10 nM (7/4) vs. Pen1-JCasp 1000 nM (13/7)	127.6	194.5	-66.92	13.76	7	13	6.877	405
Pen1-JCasp 10 nM (7/4) vs. Pen1-SCJCasp 1000 nM (7/4)	127.6	121	6.583	15.69	7	7	0.5934	405
ACSF (9/5) vs. Pen1-JCasp 1000 nM (13/7)	128.7	194.5	-65.81	12.73	9	13	7.312	405
ACSF (9/5) vs. Pen1-SCJCasp 1000 nM (7/4)	128.7	121	7.692	14.79	9	7	0.7353	405
Pen1-JCasp 1000 nM (13/7) vs. Pen1-SCJCasp 1000 nM (7/4)	194.5	121	73.5	13.76	13	7	7.554	405
Row 7
Pen1-JCasp 100 nM (14/7) vs. Pen1-JCasp 10 nM (7/4)	156.8	130.7	26.07	13.59	14	7	2.713	405
Pen1-JCasp 100 nM (14/7) vs. ACSF (9/5)	156.8	127.7	29.04	12.54	14	9	3.274	405
Pen1-JCasp 100 nM (14/7) vs. Pen1-JCasp 1000 nM (13/7)	156.8	192.9	-36.16	11.31	14	13	4.523	405
Pen1-JCasp 100 nM (14/7) vs. Pen1-SCJCasp 1000 nM (7/4)	156.8	119.6	37.22	13.59	14	7	3.874	405
Pen1-JCasp 10 nM (7/4) vs. ACSF (9/5)	130.7	127.7	2.965	14.79	7	9	0.2834	405
Pen1-JCasp 10 nM (7/4) vs. Pen1-JCasp 1000 nM (13/7)	130.7	192.9	-62.23	13.76	7	13	6.395	405
Pen1-JCasp 10 nM (7/4) vs. Pen1-SCJCasp 1000 nM (7/4)	130.7	119.6	11.15	15.69	7	7	1.005	405
ACSF (9/5) vs. Pen1-JCasp 1000 nM (13/7)	127.7	192.9	-65.19	12.73	9	13	7.243	405
ACSF (9/5) vs. Pen1-SCJCasp 1000 nM (7/4)	127.7	119.6	8.187	14.79	9	7	0.7826	405
Pen1-JCasp 1000 nM (13/7) vs. Pen1-SCJCasp 1000 nM (7/4)	192.9	119.6	73.38	13.76	13	7	7.541	405
Row 8
Pen1-JCasp 100 nM (14/7) vs. Pen1-JCasp 10 nM (7/4)	158.7	126.2	32.48	13.59	14	7	3.38	405
Pen1-JCasp 100 nM (14/7) vs. ACSF (9/5)	158.7	130.3	28.42	12.54	14	9	3.204	405
Pen1-JCasp 100 nM (14/7) vs. Pen1-JCasp 1000 nM (13/7)	158.7	192.4	-33.64	11.31	14	13	4.207	405
Pen1-JCasp 100 nM (14/7) vs. Pen1-SCJCasp 1000 nM (7/4)	158.7	125.6	33.09	13.59	14	7	3.444	405
Pen1-JCasp 10 nM (7/4) vs. ACSF (9/5)	126.2	130.3	-4.062	14.79	7	9	0.3883	405
Pen1-JCasp 10 nM (7/4) vs. Pen1-JCasp 1000 nM (13/7)	126.2	192.4	-66.11	13.76	7	13	6.794	405
Pen1-JCasp 10 nM (7/4) vs. Pen1-SCJCasp 1000 nM (7/4)	126.2	125.6	0.6133	15.69	7	7	0.05528	405
ACSF (9/5) vs. Pen1-JCasp 1000 nM (13/7)	130.3	192.4	-62.05	12.73	9	13	6.894	405
ACSF (9/5) vs. Pen1-SCJCasp 1000 nM (7/4)	130.3	125.6	4.675	14.79	9	7	0.4469	405
Pen1-JCasp 1000 nM (13/7) vs. Pen1-SCJCasp 1000 nM (7/4)	192.4	125.6	66.73	13.76	13	7	6.857	405
Row 9
Pen1-JCasp 100 nM (14/7) vs. Pen1-JCasp 10 nM (7/4)	156.2	125.5	30.68	13.59	14	7	3.193	405
Pen1-JCasp 100 nM (14/7) vs. ACSF (9/5)	156.2	128	28.22	12.54	14	9	3.182	405
Pen1-JCasp 100 nM (14/7) vs. Pen1-JCasp 1000 nM (13/7)	156.2	189.6	-33.4	11.31	14	13	4.178	405
Pen1-JCasp 100 nM (14/7) vs. Pen1-SCJCasp 1000 nM (7/4)	156.2	122.1	34.1	13.59	14	7	3.549	405
Pen1-JCasp 10 nM (7/4) vs. ACSF (9/5)	125.5	128	-2.461	14.79	7	9	0.2353	405
Pen1-JCasp 10 nM (7/4) vs. Pen1-JCasp 1000 nM (13/7)	125.5	189.6	-64.08	13.76	7	13	6.586	405
Pen1-JCasp 10 nM (7/4) vs. Pen1-SCJCasp 1000 nM (7/4)	125.5	122.1	3.42	15.69	7	7	0.3082	405
ACSF (9/5) vs. Pen1-JCasp 1000 nM (13/7)	128	189.6	-61.62	12.73	9	13	6.846	405
ACSF (9/5) vs. Pen1-SCJCasp 1000 nM (7/4)	128	122.1	5.881	14.79	9	7	0.5622	405
Pen1-JCasp 1000 nM (13/7) vs. Pen1-SCJCasp 1000 nM (7/4)	189.6	122.1	67.5	13.76	13	7	6.937	405
Row 10
Pen1-JCasp 100 nM (14/7) vs. Pen1-JCasp 10 nM (7/4)	157.7	126.1	31.68	13.59	14	7	3.297	405
Pen1-JCasp 100 nM (14/7) vs. ACSF (9/5)	157.7	128.5	29.23	12.54	14	9	3.296	405
Pen1-JCasp 100 nM (14/7) vs. Pen1-JCasp 1000 nM (13/7)	157.7	193.9	-36.18	11.31	14	13	4.526	405
Pen1-JCasp 100 nM (14/7) vs. Pen1-SCJCasp 1000 nM (7/4)	157.7	119.8	37.97	13.59	14	7	3.951	405
Pen1-JCasp 10 nM (7/4) vs. ACSF (9/5)	126.1	128.5	-2.447	14.79	7	9	0.2339	405
Pen1-JCasp 10 nM (7/4) vs. Pen1-JCasp 1000 nM (13/7)	126.1	193.9	-67.86	13.76	7	13	6.974	405
Pen1-JCasp 10 nM (7/4) vs. Pen1-SCJCasp 1000 nM (7/4)	126.1	119.8	6.287	15.69	7	7	0.5667	405
ACSF (9/5) vs. Pen1-JCasp 1000 nM (13/7)	128.5	193.9	-65.41	12.73	9	13	7.268	405
ACSF (9/5) vs. Pen1-SCJCasp 1000 nM (7/4)	128.5	119.8	8.734	14.79	9	7	0.835	405
Pen1-JCasp 1000 nM (13/7) vs. Pen1-SCJCasp 1000 nM (7/4)	193.9	119.8	74.15	13.76	13	7	7.62	405

## Sheet: main Treatment effect
Compare TREATMENT means (main TREATMENT effect)
Number of families	1
Number of comparisons per family	10
Alpha	0.05
Tukey's multiple comparisons test	Mean Diff.	95% CI of diff.	Significant?	Summary
Pen1-JCasp 100 nM (14/7) vs. Pen1-JCasp 10 nM (7/4)	26.27	-9.961 to 62.49	No	ns
Pen1-JCasp 100 nM (14/7) vs. ACSF (9/5)	25.63	-7.806 to 59.07	No	ns
Pen1-JCasp 100 nM (14/7) vs. Pen1-JCasp 1000 nM (13/7)	-32.47	-62.61 to -2.326	Yes	*
Pen1-JCasp 100 nM (14/7) vs. Pen1-SCJCasp 1000 nM (7/4)	31.02	-5.202 to 67.25	No	ns
Pen1-JCasp 10 nM (7/4) vs. ACSF (9/5)	-0.6353	-40.07 to 38.80	No	ns
Pen1-JCasp 10 nM (7/4) vs. Pen1-JCasp 1000 nM (13/7)	-58.73	-95.42 to -22.05	Yes	***
Pen1-JCasp 10 nM (7/4) vs. Pen1-SCJCasp 1000 nM (7/4)	4.759	-37.07 to 46.59	No	ns
ACSF (9/5) vs. Pen1-JCasp 1000 nM (13/7)	-58.1	-92.03 to -24.16	Yes	***
ACSF (9/5) vs. Pen1-SCJCasp 1000 nM (7/4)	5.394	-34.05 to 44.83	No	ns
Pen1-JCasp 1000 nM (13/7) vs. Pen1-SCJCasp 1000 nM (7/4)	63.49	26.80 to 100.2	Yes	***
Test details	Mean 1	Mean 2	Mean Diff.	SE of diff.	N1	N2	q	DF
Pen1-JCasp 100 nM (14/7) vs. Pen1-JCasp 10 nM (7/4)	155.5	129.3	26.27	12.75	126	63	2.913	45
Pen1-JCasp 100 nM (14/7) vs. ACSF (9/5)	155.5	129.9	25.63	11.77	126	81	3.08	45
Pen1-JCasp 100 nM (14/7) vs. Pen1-JCasp 1000 nM (13/7)	155.5	188	-32.47	10.61	126	117	4.328	45
Pen1-JCasp 100 nM (14/7) vs. Pen1-SCJCasp 1000 nM (7/4)	155.5	124.5	31.02	12.75	126	63	3.441	45
Pen1-JCasp 10 nM (7/4) vs. ACSF (9/5)	129.3	129.9	-0.6353	13.88	63	81	0.06473	45
Pen1-JCasp 10 nM (7/4) vs. Pen1-JCasp 1000 nM (13/7)	129.3	188	-58.73	12.91	63	117	6.433	45
Pen1-JCasp 10 nM (7/4) vs. Pen1-SCJCasp 1000 nM (7/4)	129.3	124.5	4.759	14.72	63	63	0.4571	45
ACSF (9/5) vs. Pen1-JCasp 1000 nM (13/7)	129.9	188	-58.1	11.94	81	117	6.88	45
ACSF (9/5) vs. Pen1-SCJCasp 1000 nM (7/4)	129.9	124.5	5.394	13.88	81	63	0.5496	45
Pen1-JCasp 1000 nM (13/7) vs. Pen1-SCJCasp 1000 nM (7/4)	188	124.5	63.49	12.91	117	63	6.954	45
