# Supplementary material for: APP and APLP2 interact with the synaptic release machinery and facilitate transmitter release at hippocampal synapses
Source: eLife. 2015 Nov 9;4:e09743. doi: 10.7554/eLife.09743 (PMC4755753; doi:10.7554/eLife.09743)
Supplement: Figure 3—source data 5. — DOI: http://dx.doi.org/10.7554/eLife.09743.011 [file elife-09743-fig3-data5.xlsx]

## Sheet: 2way ANOVA of 10hz train
Table Analyzed	10 stimuli train 10 Hz C57 mice
Two-way RM ANOVA	Matching: Stacked
Alpha	0.05
Source of Variation	% of total variation	P value	P value summary	Significant?
Interaction	1.41	< 0.0001	****	Yes
stimulus	0.524	< 0.0001	****	Yes
Treatment	44.56	< 0.0001	****	Yes
Subjects (matching)	48.18	< 0.0001	****	Yes
ANOVA table	SS	DF	MS	F (DFn, DFd)	P value
Interaction	24528	32	766.5	F (32, 360) = 2.927	P < 0.0001
stimulus	9116	8	1140	F (8, 360) = 4.352	P < 0.0001
Treatment	775213	4	193803	F (4, 45) = 10.40	P < 0.0001
Subjects (matching)	838283	45	18629	F (45, 360) = 71.14	P < 0.0001
Residual	94265	360	261.8
Number of missing values	0

## Sheet: Tukey's mult. comp. test
Within each row, compare treatments (simple effects within rows)
Number of families	9
Number of comparisons per family	10
Alpha	0.05
Tukey's multiple comparisons test	Mean Diff.	95% CI of diff.	Significant?	Summary
Row 2
Pen1-JCasp 100 nM (14/7) vs. Pen1-JCasp 10 nM (7/4)	20.54	-40.32 to 81.41	No	ns
Pen1-JCasp 100 nM (14/7) vs. ACSF (9/5)	39.79	-16.39 to 95.96	No	ns
Pen1-JCasp 100 nM (14/7) vs. Pen1-JCasp 1000 nM (13/7)	-24.07	-74.71 to 26.58	No	ns
Pen1-JCasp 100 nM (14/7) vs. Pen1-SCJCasp 1000 nM (7/4)	36.32	-24.54 to 97.19	No	ns
Pen1-JCasp 10 nM (7/4) vs. ACSF (9/5)	19.24	-47.02 to 85.51	No	ns
Pen1-JCasp 10 nM (7/4) vs. Pen1-JCasp 1000 nM (13/7)	-44.61	-106.2 to 17.03	No	ns
Pen1-JCasp 10 nM (7/4) vs. Pen1-SCJCasp 1000 nM (7/4)	15.78	-54.50 to 86.06	No	ns
ACSF (9/5) vs. Pen1-JCasp 1000 nM (13/7)	-63.85	-120.9 to -6.836	Yes	*
ACSF (9/5) vs. Pen1-SCJCasp 1000 nM (7/4)	-3.463	-69.73 to 62.80	No	ns
Pen1-JCasp 1000 nM (13/7) vs. Pen1-SCJCasp 1000 nM (7/4)	60.39	-1.253 to 122.0	No	ns
Row 3
Pen1-JCasp 100 nM (14/7) vs. Pen1-JCasp 10 nM (7/4)	19.94	-40.93 to 80.80	No	ns
Pen1-JCasp 100 nM (14/7) vs. ACSF (9/5)	47.88	-8.293 to 104.1	No	ns
Pen1-JCasp 100 nM (14/7) vs. Pen1-JCasp 1000 nM (13/7)	-53.81	-104.5 to -3.168	Yes	*
Pen1-JCasp 100 nM (14/7) vs. Pen1-SCJCasp 1000 nM (7/4)	37.64	-23.22 to 98.51	No	ns
Pen1-JCasp 10 nM (7/4) vs. ACSF (9/5)	27.95	-38.32 to 94.21	No	ns
Pen1-JCasp 10 nM (7/4) vs. Pen1-JCasp 1000 nM (13/7)	-73.75	-135.4 to -12.11	Yes	**
Pen1-JCasp 10 nM (7/4) vs. Pen1-SCJCasp 1000 nM (7/4)	17.7	-52.58 to 87.98	No	ns
ACSF (9/5) vs. Pen1-JCasp 1000 nM (13/7)	-101.7	-158.7 to -44.68	Yes	****
ACSF (9/5) vs. Pen1-SCJCasp 1000 nM (7/4)	-10.24	-76.50 to 56.02	No	ns
Pen1-JCasp 1000 nM (13/7) vs. Pen1-SCJCasp 1000 nM (7/4)	91.45	29.81 to 153.1	Yes	***
Row 4
Pen1-JCasp 100 nM (14/7) vs. Pen1-JCasp 10 nM (7/4)	29.73	-31.14 to 90.60	No	ns
Pen1-JCasp 100 nM (14/7) vs. ACSF (9/5)	48.37	-7.804 to 104.5	No	ns
Pen1-JCasp 100 nM (14/7) vs. Pen1-JCasp 1000 nM (13/7)	-67.57	-118.2 to -16.93	Yes	**
Pen1-JCasp 100 nM (14/7) vs. Pen1-SCJCasp 1000 nM (7/4)	43.36	-17.51 to 104.2	No	ns
Pen1-JCasp 10 nM (7/4) vs. ACSF (9/5)	18.64	-47.62 to 84.90	No	ns
Pen1-JCasp 10 nM (7/4) vs. Pen1-JCasp 1000 nM (13/7)	-97.3	-158.9 to -35.66	Yes	***
Pen1-JCasp 10 nM (7/4) vs. Pen1-SCJCasp 1000 nM (7/4)	13.63	-56.66 to 83.91	No	ns
ACSF (9/5) vs. Pen1-JCasp 1000 nM (13/7)	-115.9	-173.0 to -58.93	Yes	****
ACSF (9/5) vs. Pen1-SCJCasp 1000 nM (7/4)	-5.015	-71.28 to 61.25	No	ns
Pen1-JCasp 1000 nM (13/7) vs. Pen1-SCJCasp 1000 nM (7/4)	110.9	49.29 to 172.6	Yes	****
Row 5
Pen1-JCasp 100 nM (14/7) vs. Pen1-JCasp 10 nM (7/4)	26.01	-34.86 to 86.87	No	ns
Pen1-JCasp 100 nM (14/7) vs. ACSF (9/5)	41.47	-14.71 to 97.65	No	ns
Pen1-JCasp 100 nM (14/7) vs. Pen1-JCasp 1000 nM (13/7)	-69.16	-119.8 to -18.51	Yes	**
Pen1-JCasp 100 nM (14/7) vs. Pen1-SCJCasp 1000 nM (7/4)	39.9	-20.97 to 100.8	No	ns
Pen1-JCasp 10 nM (7/4) vs. ACSF (9/5)	15.46	-50.80 to 81.73	No	ns
Pen1-JCasp 10 nM (7/4) vs. Pen1-JCasp 1000 nM (13/7)	-95.16	-156.8 to -33.52	Yes	***
Pen1-JCasp 10 nM (7/4) vs. Pen1-SCJCasp 1000 nM (7/4)	13.89	-56.39 to 84.18	No	ns
ACSF (9/5) vs. Pen1-JCasp 1000 nM (13/7)	-110.6	-167.6 to -53.61	Yes	****
ACSF (9/5) vs. Pen1-SCJCasp 1000 nM (7/4)	-1.57	-67.83 to 64.69	No	ns
Pen1-JCasp 1000 nM (13/7) vs. Pen1-SCJCasp 1000 nM (7/4)	109.1	47.41 to 170.7	Yes	****
Row 6
Pen1-JCasp 100 nM (14/7) vs. Pen1-JCasp 10 nM (7/4)	31.55	-29.31 to 92.42	No	ns
Pen1-JCasp 100 nM (14/7) vs. ACSF (9/5)	42.13	-14.05 to 98.31	No	ns
Pen1-JCasp 100 nM (14/7) vs. Pen1-JCasp 1000 nM (13/7)	-66.89	-117.5 to -16.24	Yes	**
Pen1-JCasp 100 nM (14/7) vs. Pen1-SCJCasp 1000 nM (7/4)	43.16	-17.71 to 104.0	No	ns
Pen1-JCasp 10 nM (7/4) vs. ACSF (9/5)	10.58	-55.68 to 76.84	No	ns
Pen1-JCasp 10 nM (7/4) vs. Pen1-JCasp 1000 nM (13/7)	-98.44	-160.1 to -36.80	Yes	***
Pen1-JCasp 10 nM (7/4) vs. Pen1-SCJCasp 1000 nM (7/4)	11.61	-58.68 to 81.89	No	ns
ACSF (9/5) vs. Pen1-JCasp 1000 nM (13/7)	-109	-166.0 to -52.00	Yes	****
ACSF (9/5) vs. Pen1-SCJCasp 1000 nM (7/4)	1.028	-65.23 to 67.29	No	ns
Pen1-JCasp 1000 nM (13/7) vs. Pen1-SCJCasp 1000 nM (7/4)	110	48.40 to 171.7	Yes	****
Row 7
Pen1-JCasp 100 nM (14/7) vs. Pen1-JCasp 10 nM (7/4)	34.71	-26.16 to 95.58	No	ns
Pen1-JCasp 100 nM (14/7) vs. ACSF (9/5)	46.39	-9.790 to 102.6	No	ns
Pen1-JCasp 100 nM (14/7) vs. Pen1-JCasp 1000 nM (13/7)	-68.21	-118.9 to -17.57	Yes	**
Pen1-JCasp 100 nM (14/7) vs. Pen1-SCJCasp 1000 nM (7/4)	46.74	-14.13 to 107.6	No	ns
Pen1-JCasp 10 nM (7/4) vs. ACSF (9/5)	11.68	-54.59 to 77.94	No	ns
Pen1-JCasp 10 nM (7/4) vs. Pen1-JCasp 1000 nM (13/7)	-102.9	-164.6 to -41.28	Yes	****
Pen1-JCasp 10 nM (7/4) vs. Pen1-SCJCasp 1000 nM (7/4)	12.03	-58.25 to 82.31	No	ns
ACSF (9/5) vs. Pen1-JCasp 1000 nM (13/7)	-114.6	-171.6 to -57.58	Yes	****
ACSF (9/5) vs. Pen1-SCJCasp 1000 nM (7/4)	0.3527	-65.91 to 66.61	No	ns
Pen1-JCasp 1000 nM (13/7) vs. Pen1-SCJCasp 1000 nM (7/4)	114.9	53.31 to 176.6	Yes	****
Row 8
Pen1-JCasp 100 nM (14/7) vs. Pen1-JCasp 10 nM (7/4)	39.13	-21.73 to 100.0	No	ns
Pen1-JCasp 100 nM (14/7) vs. ACSF (9/5)	52.64	-3.539 to 108.8	No	ns
Pen1-JCasp 100 nM (14/7) vs. Pen1-JCasp 1000 nM (13/7)	-59.16	-109.8 to -8.514	Yes	*
Pen1-JCasp 100 nM (14/7) vs. Pen1-SCJCasp 1000 nM (7/4)	50.54	-10.33 to 111.4	No	ns
Pen1-JCasp 10 nM (7/4) vs. ACSF (9/5)	13.5	-52.76 to 79.76	No	ns
Pen1-JCasp 10 nM (7/4) vs. Pen1-JCasp 1000 nM (13/7)	-98.29	-159.9 to -36.65	Yes	***
Pen1-JCasp 10 nM (7/4) vs. Pen1-SCJCasp 1000 nM (7/4)	11.4	-58.88 to 81.69	No	ns
ACSF (9/5) vs. Pen1-JCasp 1000 nM (13/7)	-111.8	-168.8 to -54.78	Yes	****
ACSF (9/5) vs. Pen1-SCJCasp 1000 nM (7/4)	-2.098	-68.36 to 64.16	No	ns
Pen1-JCasp 1000 nM (13/7) vs. Pen1-SCJCasp 1000 nM (7/4)	109.7	48.06 to 171.3	Yes	****
Row 9
Pen1-JCasp 100 nM (14/7) vs. Pen1-JCasp 10 nM (7/4)	38.32	-22.55 to 99.18	No	ns
Pen1-JCasp 100 nM (14/7) vs. ACSF (9/5)	55.18	-0.9938 to 111.4	No	ns
Pen1-JCasp 100 nM (14/7) vs. Pen1-JCasp 1000 nM (13/7)	-65.54	-116.2 to -14.90	Yes	**
Pen1-JCasp 100 nM (14/7) vs. Pen1-SCJCasp 1000 nM (7/4)	51.37	-9.491 to 112.2	No	ns
Pen1-JCasp 10 nM (7/4) vs. ACSF (9/5)	16.87	-49.40 to 83.13	No	ns
Pen1-JCasp 10 nM (7/4) vs. Pen1-JCasp 1000 nM (13/7)	-103.9	-165.5 to -42.22	Yes	****
Pen1-JCasp 10 nM (7/4) vs. Pen1-SCJCasp 1000 nM (7/4)	13.06	-57.22 to 83.34	No	ns
ACSF (9/5) vs. Pen1-JCasp 1000 nM (13/7)	-120.7	-177.7 to -63.71	Yes	****
ACSF (9/5) vs. Pen1-SCJCasp 1000 nM (7/4)	-3.808	-70.07 to 62.45	No	ns
Pen1-JCasp 1000 nM (13/7) vs. Pen1-SCJCasp 1000 nM (7/4)	116.9	55.28 to 178.6	Yes	****
Row 10
Pen1-JCasp 100 nM (14/7) vs. Pen1-JCasp 10 nM (7/4)	41.76	-19.10 to 102.6	No	ns
Pen1-JCasp 100 nM (14/7) vs. ACSF (9/5)	62.46	6.288 to 118.6	Yes	*
Pen1-JCasp 100 nM (14/7) vs. Pen1-JCasp 1000 nM (13/7)	-54.86	-105.5 to -4.213	Yes	*
Pen1-JCasp 100 nM (14/7) vs. Pen1-SCJCasp 1000 nM (7/4)	53.47	-7.398 to 114.3	No	ns
Pen1-JCasp 10 nM (7/4) vs. ACSF (9/5)	20.7	-45.56 to 86.96	No	ns
Pen1-JCasp 10 nM (7/4) vs. Pen1-JCasp 1000 nM (13/7)	-96.62	-158.3 to -34.98	Yes	***
Pen1-JCasp 10 nM (7/4) vs. Pen1-SCJCasp 1000 nM (7/4)	11.71	-58.57 to 81.99	No	ns
ACSF (9/5) vs. Pen1-JCasp 1000 nM (13/7)	-117.3	-174.3 to -60.31	Yes	****
ACSF (9/5) vs. Pen1-SCJCasp 1000 nM (7/4)	-8.996	-75.26 to 57.27	No	ns
Pen1-JCasp 1000 nM (13/7) vs. Pen1-SCJCasp 1000 nM (7/4)	108.3	46.68 to 170.0	Yes	****
Test details	Mean 1	Mean 2	Mean Diff.	SE of diff.	N1	N2	q	DF
Row 2
Pen1-JCasp 100 nM (14/7) vs. Pen1-JCasp 10 nM (7/4)	190.6	170.1	20.54	22.21	14	7	1.308	405
Pen1-JCasp 100 nM (14/7) vs. ACSF (9/5)	190.6	150.8	39.79	20.5	14	9	2.744	405
Pen1-JCasp 100 nM (14/7) vs. Pen1-JCasp 1000 nM (13/7)	190.6	214.7	-24.07	18.48	14	13	1.841	405
Pen1-JCasp 100 nM (14/7) vs. Pen1-SCJCasp 1000 nM (7/4)	190.6	154.3	36.32	22.21	14	7	2.313	405
Pen1-JCasp 10 nM (7/4) vs. ACSF (9/5)	170.1	150.8	19.24	24.18	7	9	1.125	405
Pen1-JCasp 10 nM (7/4) vs. Pen1-JCasp 1000 nM (13/7)	170.1	214.7	-44.61	22.5	7	13	2.804	405
Pen1-JCasp 10 nM (7/4) vs. Pen1-SCJCasp 1000 nM (7/4)	170.1	154.3	15.78	25.65	7	7	0.8701	405
ACSF (9/5) vs. Pen1-JCasp 1000 nM (13/7)	150.8	214.7	-63.85	20.81	9	13	4.34	405
ACSF (9/5) vs. Pen1-SCJCasp 1000 nM (7/4)	150.8	154.3	-3.463	24.18	9	7	0.2025	405
Pen1-JCasp 1000 nM (13/7) vs. Pen1-SCJCasp 1000 nM (7/4)	214.7	154.3	60.39	22.5	13	7	3.796	405
Row 3
Pen1-JCasp 100 nM (14/7) vs. Pen1-JCasp 10 nM (7/4)	195.1	175.1	19.94	22.21	14	7	1.269	405
Pen1-JCasp 100 nM (14/7) vs. ACSF (9/5)	195.1	147.2	47.88	20.5	14	9	3.303	405
Pen1-JCasp 100 nM (14/7) vs. Pen1-JCasp 1000 nM (13/7)	195.1	248.9	-53.81	18.48	14	13	4.118	405
Pen1-JCasp 100 nM (14/7) vs. Pen1-SCJCasp 1000 nM (7/4)	195.1	157.4	37.64	22.21	14	7	2.396	405
Pen1-JCasp 10 nM (7/4) vs. ACSF (9/5)	175.1	147.2	27.95	24.18	7	9	1.634	405
Pen1-JCasp 10 nM (7/4) vs. Pen1-JCasp 1000 nM (13/7)	175.1	248.9	-73.75	22.5	7	13	4.636	405
Pen1-JCasp 10 nM (7/4) vs. Pen1-SCJCasp 1000 nM (7/4)	175.1	157.4	17.7	25.65	7	7	0.976	405
ACSF (9/5) vs. Pen1-JCasp 1000 nM (13/7)	147.2	248.9	-101.7	20.81	9	13	6.912	405
ACSF (9/5) vs. Pen1-SCJCasp 1000 nM (7/4)	147.2	157.4	-10.24	24.18	9	7	0.599	405
Pen1-JCasp 1000 nM (13/7) vs. Pen1-SCJCasp 1000 nM (7/4)	248.9	157.4	91.45	22.5	13	7	5.749	405
Row 4
Pen1-JCasp 100 nM (14/7) vs. Pen1-JCasp 10 nM (7/4)	190.3	160.6	29.73	22.21	14	7	1.893	405
Pen1-JCasp 100 nM (14/7) vs. ACSF (9/5)	190.3	141.9	48.37	20.5	14	9	3.337	405
Pen1-JCasp 100 nM (14/7) vs. Pen1-JCasp 1000 nM (13/7)	190.3	257.9	-67.57	18.48	14	13	5.171	405
Pen1-JCasp 100 nM (14/7) vs. Pen1-SCJCasp 1000 nM (7/4)	190.3	146.9	43.36	22.21	14	7	2.76	405
Pen1-JCasp 10 nM (7/4) vs. ACSF (9/5)	160.6	141.9	18.64	24.18	7	9	1.09	405
Pen1-JCasp 10 nM (7/4) vs. Pen1-JCasp 1000 nM (13/7)	160.6	257.9	-97.3	22.5	7	13	6.117	405
Pen1-JCasp 10 nM (7/4) vs. Pen1-SCJCasp 1000 nM (7/4)	160.6	146.9	13.63	25.65	7	7	0.7513	405
ACSF (9/5) vs. Pen1-JCasp 1000 nM (13/7)	141.9	257.9	-115.9	20.81	9	13	7.88	405
ACSF (9/5) vs. Pen1-SCJCasp 1000 nM (7/4)	141.9	146.9	-5.015	24.18	9	7	0.2933	405
Pen1-JCasp 1000 nM (13/7) vs. Pen1-SCJCasp 1000 nM (7/4)	257.9	146.9	110.9	22.5	13	7	6.974	405
Row 5
Pen1-JCasp 100 nM (14/7) vs. Pen1-JCasp 10 nM (7/4)	183.7	157.7	26.01	22.21	14	7	1.656	405
Pen1-JCasp 100 nM (14/7) vs. ACSF (9/5)	183.7	142.2	41.47	20.5	14	9	2.861	405
Pen1-JCasp 100 nM (14/7) vs. Pen1-JCasp 1000 nM (13/7)	183.7	252.9	-69.16	18.48	14	13	5.292	405
Pen1-JCasp 100 nM (14/7) vs. Pen1-SCJCasp 1000 nM (7/4)	183.7	143.8	39.9	22.21	14	7	2.54	405
Pen1-JCasp 10 nM (7/4) vs. ACSF (9/5)	157.7	142.2	15.46	24.18	7	9	0.9044	405
Pen1-JCasp 10 nM (7/4) vs. Pen1-JCasp 1000 nM (13/7)	157.7	252.9	-95.16	22.5	7	13	5.982	405
Pen1-JCasp 10 nM (7/4) vs. Pen1-SCJCasp 1000 nM (7/4)	157.7	143.8	13.89	25.65	7	7	0.7661	405
ACSF (9/5) vs. Pen1-JCasp 1000 nM (13/7)	142.2	252.9	-110.6	20.81	9	13	7.519	405
ACSF (9/5) vs. Pen1-SCJCasp 1000 nM (7/4)	142.2	143.8	-1.57	24.18	9	7	0.0918	405
Pen1-JCasp 1000 nM (13/7) vs. Pen1-SCJCasp 1000 nM (7/4)	252.9	143.8	109.1	22.5	13	7	6.856	405
Row 6
Pen1-JCasp 100 nM (14/7) vs. Pen1-JCasp 10 nM (7/4)	184.8	153.2	31.55	22.21	14	7	2.009	405
Pen1-JCasp 100 nM (14/7) vs. ACSF (9/5)	184.8	142.6	42.13	20.5	14	9	2.906	405
Pen1-JCasp 100 nM (14/7) vs. Pen1-JCasp 1000 nM (13/7)	184.8	251.7	-66.89	18.48	14	13	5.118	405
Pen1-JCasp 100 nM (14/7) vs. Pen1-SCJCasp 1000 nM (7/4)	184.8	141.6	43.16	22.21	14	7	2.748	405
Pen1-JCasp 10 nM (7/4) vs. ACSF (9/5)	153.2	142.6	10.58	24.18	7	9	0.6186	405
Pen1-JCasp 10 nM (7/4) vs. Pen1-JCasp 1000 nM (13/7)	153.2	251.7	-98.44	22.5	7	13	6.188	405
Pen1-JCasp 10 nM (7/4) vs. Pen1-SCJCasp 1000 nM (7/4)	153.2	141.6	11.61	25.65	7	7	0.6399	405
ACSF (9/5) vs. Pen1-JCasp 1000 nM (13/7)	142.6	251.7	-109	20.81	9	13	7.409	405
ACSF (9/5) vs. Pen1-SCJCasp 1000 nM (7/4)	142.6	141.6	1.028	24.18	9	7	0.06013	405
Pen1-JCasp 1000 nM (13/7) vs. Pen1-SCJCasp 1000 nM (7/4)	251.7	141.6	110	22.5	13	7	6.918	405
Row 7
Pen1-JCasp 100 nM (14/7) vs. Pen1-JCasp 10 nM (7/4)	186.1	151.4	34.71	22.21	14	7	2.21	405
Pen1-JCasp 100 nM (14/7) vs. ACSF (9/5)	186.1	139.7	46.39	20.5	14	9	3.2	405
Pen1-JCasp 100 nM (14/7) vs. Pen1-JCasp 1000 nM (13/7)	186.1	254.3	-68.21	18.48	14	13	5.219	405
Pen1-JCasp 100 nM (14/7) vs. Pen1-SCJCasp 1000 nM (7/4)	186.1	139.3	46.74	22.21	14	7	2.976	405
Pen1-JCasp 10 nM (7/4) vs. ACSF (9/5)	151.4	139.7	11.68	24.18	7	9	0.6828	405
Pen1-JCasp 10 nM (7/4) vs. Pen1-JCasp 1000 nM (13/7)	151.4	254.3	-102.9	22.5	7	13	6.47	405
Pen1-JCasp 10 nM (7/4) vs. Pen1-SCJCasp 1000 nM (7/4)	151.4	139.3	12.03	25.65	7	7	0.6632	405
ACSF (9/5) vs. Pen1-JCasp 1000 nM (13/7)	139.7	254.3	-114.6	20.81	9	13	7.788	405
ACSF (9/5) vs. Pen1-SCJCasp 1000 nM (7/4)	139.7	139.3	0.3527	24.18	9	7	0.02063	405
Pen1-JCasp 1000 nM (13/7) vs. Pen1-SCJCasp 1000 nM (7/4)	254.3	139.3	114.9	22.5	13	7	7.226	405
Row 8
Pen1-JCasp 100 nM (14/7) vs. Pen1-JCasp 10 nM (7/4)	189	149.8	39.13	22.21	14	7	2.492	405
Pen1-JCasp 100 nM (14/7) vs. ACSF (9/5)	189	136.3	52.64	20.5	14	9	3.631	405
Pen1-JCasp 100 nM (14/7) vs. Pen1-JCasp 1000 nM (13/7)	189	248.1	-59.16	18.48	14	13	4.527	405
Pen1-JCasp 100 nM (14/7) vs. Pen1-SCJCasp 1000 nM (7/4)	189	138.4	50.54	22.21	14	7	3.218	405
Pen1-JCasp 10 nM (7/4) vs. ACSF (9/5)	149.8	136.3	13.5	24.18	7	9	0.7897	405
Pen1-JCasp 10 nM (7/4) vs. Pen1-JCasp 1000 nM (13/7)	149.8	248.1	-98.29	22.5	7	13	6.179	405
Pen1-JCasp 10 nM (7/4) vs. Pen1-SCJCasp 1000 nM (7/4)	149.8	138.4	11.4	25.65	7	7	0.6288	405
ACSF (9/5) vs. Pen1-JCasp 1000 nM (13/7)	136.3	248.1	-111.8	20.81	9	13	7.598	405
ACSF (9/5) vs. Pen1-SCJCasp 1000 nM (7/4)	136.3	138.4	-2.098	24.18	9	7	0.1227	405
Pen1-JCasp 1000 nM (13/7) vs. Pen1-SCJCasp 1000 nM (7/4)	248.1	138.4	109.7	22.5	13	7	6.896	405
Row 9
Pen1-JCasp 100 nM (14/7) vs. Pen1-JCasp 10 nM (7/4)	186.1	147.8	38.32	22.21	14	7	2.439	405
Pen1-JCasp 100 nM (14/7) vs. ACSF (9/5)	186.1	130.9	55.18	20.5	14	9	3.807	405
Pen1-JCasp 100 nM (14/7) vs. Pen1-JCasp 1000 nM (13/7)	186.1	251.6	-65.54	18.48	14	13	5.015	405
Pen1-JCasp 100 nM (14/7) vs. Pen1-SCJCasp 1000 nM (7/4)	186.1	134.7	51.37	22.21	14	7	3.271	405
Pen1-JCasp 10 nM (7/4) vs. ACSF (9/5)	147.8	130.9	16.87	24.18	7	9	0.9864	405
Pen1-JCasp 10 nM (7/4) vs. Pen1-JCasp 1000 nM (13/7)	147.8	251.6	-103.9	22.5	7	13	6.529	405
Pen1-JCasp 10 nM (7/4) vs. Pen1-SCJCasp 1000 nM (7/4)	147.8	134.7	13.06	25.65	7	7	0.72	405
ACSF (9/5) vs. Pen1-JCasp 1000 nM (13/7)	130.9	251.6	-120.7	20.81	9	13	8.205	405
ACSF (9/5) vs. Pen1-SCJCasp 1000 nM (7/4)	130.9	134.7	-3.808	24.18	9	7	0.2227	405
Pen1-JCasp 1000 nM (13/7) vs. Pen1-SCJCasp 1000 nM (7/4)	251.6	134.7	116.9	22.5	13	7	7.35	405
Row 10
Pen1-JCasp 100 nM (14/7) vs. Pen1-JCasp 10 nM (7/4)	188.5	146.7	41.76	22.21	14	7	2.659	405
Pen1-JCasp 100 nM (14/7) vs. ACSF (9/5)	188.5	126	62.46	20.5	14	9	4.309	405
Pen1-JCasp 100 nM (14/7) vs. Pen1-JCasp 1000 nM (13/7)	188.5	243.3	-54.86	18.48	14	13	4.197	405
Pen1-JCasp 100 nM (14/7) vs. Pen1-SCJCasp 1000 nM (7/4)	188.5	135	53.47	22.21	14	7	3.404	405
Pen1-JCasp 10 nM (7/4) vs. ACSF (9/5)	146.7	126	20.7	24.18	7	9	1.211	405
Pen1-JCasp 10 nM (7/4) vs. Pen1-JCasp 1000 nM (13/7)	146.7	243.3	-96.62	22.5	7	13	6.074	405
Pen1-JCasp 10 nM (7/4) vs. Pen1-SCJCasp 1000 nM (7/4)	146.7	135	11.71	25.65	7	7	0.6455	405
ACSF (9/5) vs. Pen1-JCasp 1000 nM (13/7)	126	243.3	-117.3	20.81	9	13	7.974	405
ACSF (9/5) vs. Pen1-SCJCasp 1000 nM (7/4)	126	135	-8.996	24.18	9	7	0.5261	405
Pen1-JCasp 1000 nM (13/7) vs. Pen1-SCJCasp 1000 nM (7/4)	243.3	135	108.3	22.5	13	7	6.81	405
Pen1-JCasp 100 nM (14/7) vs. Pen1-JCasp 10 nM (7/4)	186.1	147.8	38.32	21.07	14	7	2.571	450
Pen1-JCasp 100 nM (14/7) vs. ACSF (9/5)	186.1	130.9	55.18	19.45	14	9	4.012	450
Pen1-JCasp 100 nM (14/7) vs. Pen1-JCasp 1000 nM (13/7)	186.1	251.6	-65.54	17.53	14	13	5.287	450
Pen1-JCasp 100 nM (14/7) vs. Pen1-SCJCasp 1000 nM (7/4)	186.1	134.7	51.37	21.07	14	7	3.448	450
Pen1-JCasp 10 nM (7/4) vs. ACSF (9/5)	147.8	130.9	16.87	22.94	7	9	1.04	450
Pen1-JCasp 10 nM (7/4) vs. Pen1-JCasp 1000 nM (13/7)	147.8	251.6	-103.9	21.34	7	13	6.882	450
Pen1-JCasp 10 nM (7/4) vs. Pen1-SCJCasp 1000 nM (7/4)	147.8	134.7	13.06	24.33	7	7	0.759	450
ACSF (9/5) vs. Pen1-JCasp 1000 nM (13/7)	130.9	251.6	-120.7	19.74	9	13	8.649	450
ACSF (9/5) vs. Pen1-SCJCasp 1000 nM (7/4)	130.9	134.7	-3.808	22.94	9	7	0.2348	450
Pen1-JCasp 1000 nM (13/7) vs. Pen1-SCJCasp 1000 nM (7/4)	251.6	134.7	116.9	21.34	13	7	7.748	450
fEPSP10/fEPSP1 X 100
Pen1-JCasp 100 nM (14/7) vs. Pen1-JCasp 10 nM (7/4)	188.5	146.7	41.76	21.07	14	7	2.803	450
Pen1-JCasp 100 nM (14/7) vs. ACSF (9/5)	188.5	126	62.46	19.45	14	9	4.542	450
Pen1-JCasp 100 nM (14/7) vs. Pen1-JCasp 1000 nM (13/7)	188.5	243.3	-54.86	17.53	14	13	4.425	450
Pen1-JCasp 100 nM (14/7) vs. Pen1-SCJCasp 1000 nM (7/4)	188.5	135	53.47	21.07	14	7	3.588	450
Pen1-JCasp 10 nM (7/4) vs. ACSF (9/5)	146.7	126	20.7	22.94	7	9	1.276	450
Pen1-JCasp 10 nM (7/4) vs. Pen1-JCasp 1000 nM (13/7)	146.7	243.3	-96.62	21.34	7	13	6.402	450
Pen1-JCasp 10 nM (7/4) vs. Pen1-SCJCasp 1000 nM (7/4)	146.7	135	11.71	24.33	7	7	0.6804	450
ACSF (9/5) vs. Pen1-JCasp 1000 nM (13/7)	126	243.3	-117.3	19.74	9	13	8.405	450
ACSF (9/5) vs. Pen1-SCJCasp 1000 nM (7/4)	126	135	-8.996	22.94	9	7	0.5546	450
Pen1-JCasp 1000 nM (13/7) vs. Pen1-SCJCasp 1000 nM (7/4)	243.3	135	108.3	21.34	13	7	7.178	450

## Sheet: main Treatment effect
Compare TREATMENT means (main TREATMENT effect)
Number of families	1
Number of comparisons per family	10
Alpha	0.05
Tukey's multiple comparisons test	Mean Diff.	95% CI of diff.	Significant?	Summary
Pen1-JCasp 100 nM (14/7) vs. Pen1-JCasp 10 nM (7/4)	31.3	-28.54 to 91.14	No	ns
Pen1-JCasp 100 nM (14/7) vs. ACSF (9/5)	48.48	-6.752 to 103.7	No	ns
Pen1-JCasp 100 nM (14/7) vs. Pen1-JCasp 1000 nM (13/7)	-58.81	-108.6 to -9.015	Yes	*
Pen1-JCasp 100 nM (14/7) vs. Pen1-SCJCasp 1000 nM (7/4)	44.72	-15.12 to 104.6	No	ns
Pen1-JCasp 10 nM (7/4) vs. ACSF (9/5)	17.18	-47.97 to 82.33	No	ns
Pen1-JCasp 10 nM (7/4) vs. Pen1-JCasp 1000 nM (13/7)	-90.11	-150.7 to -29.50	Yes	**
Pen1-JCasp 10 nM (7/4) vs. Pen1-SCJCasp 1000 nM (7/4)	13.42	-55.68 to 82.52	No	ns
ACSF (9/5) vs. Pen1-JCasp 1000 nM (13/7)	-107.3	-163.3 to -51.23	Yes	****
ACSF (9/5) vs. Pen1-SCJCasp 1000 nM (7/4)	-3.757	-68.90 to 61.39	No	ns
Pen1-JCasp 1000 nM (13/7) vs. Pen1-SCJCasp 1000 nM (7/4)	103.5	42.92 to 164.1	Yes	***
Test details	Mean 1	Mean 2	Mean Diff.	SE of diff.	N1	N2	q	DF
Pen1-JCasp 100 nM (14/7) vs. Pen1-JCasp 10 nM (7/4)	188.2	156.9	31.3	21.06	126	63	2.102	45
Pen1-JCasp 100 nM (14/7) vs. ACSF (9/5)	188.2	139.8	48.48	19.44	126	81	3.527	45
Pen1-JCasp 100 nM (14/7) vs. Pen1-JCasp 1000 nM (13/7)	188.2	247	-58.81	17.52	126	117	4.746	45
Pen1-JCasp 100 nM (14/7) vs. Pen1-SCJCasp 1000 nM (7/4)	188.2	143.5	44.72	21.06	126	63	3.003	45
Pen1-JCasp 10 nM (7/4) vs. ACSF (9/5)	156.9	139.8	17.18	22.93	63	81	1.06	45
Pen1-JCasp 10 nM (7/4) vs. Pen1-JCasp 1000 nM (13/7)	156.9	247	-90.11	21.33	63	117	5.975	45
Pen1-JCasp 10 nM (7/4) vs. Pen1-SCJCasp 1000 nM (7/4)	156.9	143.5	13.42	24.32	63	63	0.7806	45
ACSF (9/5) vs. Pen1-JCasp 1000 nM (13/7)	139.8	247	-107.3	19.73	81	117	7.691	45
ACSF (9/5) vs. Pen1-SCJCasp 1000 nM (7/4)	139.8	143.5	-3.757	22.93	81	63	0.2317	45
Pen1-JCasp 1000 nM (13/7) vs. Pen1-SCJCasp 1000 nM (7/4)	247	143.5	103.5	21.33	117	63	6.865	45
