# Supplementary material for: APP and APLP2 interact with the synaptic release machinery and facilitate transmitter release at hippocampal synapses
Source: eLife. 2015 Nov 9;4:e09743. doi: 10.7554/eLife.09743 (PMC4755753; doi:10.7554/eLife.09743)
Supplement: Figure 3—source data 6. — DOI: http://dx.doi.org/10.7554/eLife.09743.012 [file elife-09743-fig3-data6.xlsx]

## Sheet: 2way ANOVA of 20hz train
Table Analyzed	Train 10
Two-way RM ANOVA	Matching: Stacked
Alpha	0.05
Source of Variation	% of total variation	P value	P value summary	Significant?
Interaction	2.596	< 0.0001	****	Yes
stimulus	1.273	< 0.0001	****	Yes
Treatment	52.02	< 0.0001	****	Yes
Subjects (matching)	37.85	< 0.0001	****	Yes
ANOVA table	SS	DF	MS	F (DFn, DFd)	P value
Interaction	66807	32	2088	F (32, 360) = 4.485	P < 0.0001
stimulus	32773	8	4097	F (8, 360) = 8.802	P < 0.0001
Treatment	1339000	4	334736	F (4, 45) = 15.46	P < 0.0001
Subjects (matching)	974195	45	21649	F (45, 360) = 46.51	P < 0.0001
Residual	167558	360	465.4
Number of missing values	0

## Sheet: Tukey's mult. comp. test
Turkey's mult. Comp. test
Number of families	9
Number of comparisons per family	10
Alpha	0.05
Tukey's multiple comparisons test	Mean Diff.	95% CI of diff.	Significant?	Summary
Row 2
Pen1-JCasp 100 nM (14/7) vs. Pen1-JCasp 10 nM (7/4)	11.87	-55.48 to 79.22	No	ns
Pen1-JCasp 100 nM (14/7) vs. ACSF (9/5)	21.54	-40.62 to 83.70	No	ns
Pen1-JCasp 100 nM (14/7) vs. Pen1-JCasp 1000 nM (13/7)	-37.47	-93.50 to 18.57	No	ns
Pen1-JCasp 100 nM (14/7) vs. Pen1-SCJCasp 1000 nM (7/4)	26.99	-40.36 to 94.34	No	ns
Pen1-JCasp 10 nM (7/4) vs. ACSF (9/5)	9.671	-63.65 to 82.99	No	ns
Pen1-JCasp 10 nM (7/4) vs. Pen1-JCasp 1000 nM (13/7)	-49.34	-117.5 to 18.87	No	ns
Pen1-JCasp 10 nM (7/4) vs. Pen1-SCJCasp 1000 nM (7/4)	15.12	-62.65 to 92.88	No	ns
ACSF (9/5) vs. Pen1-JCasp 1000 nM (13/7)	-59.01	-122.1 to 4.078	No	ns
ACSF (9/5) vs. Pen1-SCJCasp 1000 nM (7/4)	5.446	-67.87 to 78.77	No	ns
Pen1-JCasp 1000 nM (13/7) vs. Pen1-SCJCasp 1000 nM (7/4)	64.46	-3.750 to 132.7	No	ns
Row 3
Pen1-JCasp 100 nM (14/7) vs. Pen1-JCasp 10 nM (7/4)	31.64	-35.70 to 98.99	No	ns
Pen1-JCasp 100 nM (14/7) vs. ACSF (9/5)	34.11	-28.05 to 96.27	No	ns
Pen1-JCasp 100 nM (14/7) vs. Pen1-JCasp 1000 nM (13/7)	-74.84	-130.9 to -18.80	Yes	**
Pen1-JCasp 100 nM (14/7) vs. Pen1-SCJCasp 1000 nM (7/4)	47.67	-19.68 to 115.0	No	ns
Pen1-JCasp 10 nM (7/4) vs. ACSF (9/5)	2.47	-70.85 to 75.79	No	ns
Pen1-JCasp 10 nM (7/4) vs. Pen1-JCasp 1000 nM (13/7)	-106.5	-174.7 to -38.28	Yes	***
Pen1-JCasp 10 nM (7/4) vs. Pen1-SCJCasp 1000 nM (7/4)	16.03	-61.74 to 93.79	No	ns
ACSF (9/5) vs. Pen1-JCasp 1000 nM (13/7)	-109	-172.0 to -45.87	Yes	****
ACSF (9/5) vs. Pen1-SCJCasp 1000 nM (7/4)	13.56	-59.76 to 86.87	No	ns
Pen1-JCasp 1000 nM (13/7) vs. Pen1-SCJCasp 1000 nM (7/4)	122.5	54.30 to 190.7	Yes	****
Row 4
Pen1-JCasp 100 nM (14/7) vs. Pen1-JCasp 10 nM (7/4)	33.97	-33.38 to 101.3	No	ns
Pen1-JCasp 100 nM (14/7) vs. ACSF (9/5)	34.84	-27.32 to 97.00	No	ns
Pen1-JCasp 100 nM (14/7) vs. Pen1-JCasp 1000 nM (13/7)	-94.61	-150.6 to -38.57	Yes	****
Pen1-JCasp 100 nM (14/7) vs. Pen1-SCJCasp 1000 nM (7/4)	47.81	-19.54 to 115.2	No	ns
Pen1-JCasp 10 nM (7/4) vs. ACSF (9/5)	0.8634	-72.46 to 74.18	No	ns
Pen1-JCasp 10 nM (7/4) vs. Pen1-JCasp 1000 nM (13/7)	-128.6	-196.8 to -60.37	Yes	****
Pen1-JCasp 10 nM (7/4) vs. Pen1-SCJCasp 1000 nM (7/4)	13.84	-63.93 to 91.60	No	ns
ACSF (9/5) vs. Pen1-JCasp 1000 nM (13/7)	-129.4	-192.5 to -66.36	Yes	****
ACSF (9/5) vs. Pen1-SCJCasp 1000 nM (7/4)	12.97	-60.35 to 86.29	No	ns
Pen1-JCasp 1000 nM (13/7) vs. Pen1-SCJCasp 1000 nM (7/4)	142.4	74.21 to 210.6	Yes	****
Row 5
Pen1-JCasp 100 nM (14/7) vs. Pen1-JCasp 10 nM (7/4)	36.27	-31.08 to 103.6	No	ns
Pen1-JCasp 100 nM (14/7) vs. ACSF (9/5)	44.24	-17.91 to 106.4	No	ns
Pen1-JCasp 100 nM (14/7) vs. Pen1-JCasp 1000 nM (13/7)	-99.67	-155.7 to -43.63	Yes	****
Pen1-JCasp 100 nM (14/7) vs. Pen1-SCJCasp 1000 nM (7/4)	57.25	-10.09 to 124.6	No	ns
Pen1-JCasp 10 nM (7/4) vs. ACSF (9/5)	7.975	-65.34 to 81.29	No	ns
Pen1-JCasp 10 nM (7/4) vs. Pen1-JCasp 1000 nM (13/7)	-135.9	-204.1 to -67.73	Yes	****
Pen1-JCasp 10 nM (7/4) vs. Pen1-SCJCasp 1000 nM (7/4)	20.98	-56.78 to 98.75	No	ns
ACSF (9/5) vs. Pen1-JCasp 1000 nM (13/7)	-143.9	-207.0 to -80.82	Yes	****
ACSF (9/5) vs. Pen1-SCJCasp 1000 nM (7/4)	13.01	-60.31 to 86.33	No	ns
Pen1-JCasp 1000 nM (13/7) vs. Pen1-SCJCasp 1000 nM (7/4)	156.9	88.71 to 225.1	Yes	****
Row 6
Pen1-JCasp 100 nM (14/7) vs. Pen1-JCasp 10 nM (7/4)	42.3	-25.05 to 109.6	No	ns
Pen1-JCasp 100 nM (14/7) vs. ACSF (9/5)	39.21	-22.95 to 101.4	No	ns
Pen1-JCasp 100 nM (14/7) vs. Pen1-JCasp 1000 nM (13/7)	-101.7	-157.7 to -45.63	Yes	****
Pen1-JCasp 100 nM (14/7) vs. Pen1-SCJCasp 1000 nM (7/4)	53.97	-13.38 to 121.3	No	ns
Pen1-JCasp 10 nM (7/4) vs. ACSF (9/5)	-3.083	-76.40 to 70.24	No	ns
Pen1-JCasp 10 nM (7/4) vs. Pen1-JCasp 1000 nM (13/7)	-144	-212.2 to -75.75	Yes	****
Pen1-JCasp 10 nM (7/4) vs. Pen1-SCJCasp 1000 nM (7/4)	11.67	-66.09 to 89.44	No	ns
ACSF (9/5) vs. Pen1-JCasp 1000 nM (13/7)	-140.9	-204.0 to -77.79	Yes	****
ACSF (9/5) vs. Pen1-SCJCasp 1000 nM (7/4)	14.76	-58.56 to 88.07	No	ns
Pen1-JCasp 1000 nM (13/7) vs. Pen1-SCJCasp 1000 nM (7/4)	155.6	87.43 to 223.8	Yes	****
Row 7
Pen1-JCasp 100 nM (14/7) vs. Pen1-JCasp 10 nM (7/4)	46.79	-20.56 to 114.1	No	ns
Pen1-JCasp 100 nM (14/7) vs. ACSF (9/5)	45.79	-16.37 to 108.0	No	ns
Pen1-JCasp 100 nM (14/7) vs. Pen1-JCasp 1000 nM (13/7)	-98.23	-154.3 to -42.19	Yes	****
Pen1-JCasp 100 nM (14/7) vs. Pen1-SCJCasp 1000 nM (7/4)	60.43	-6.921 to 127.8	No	ns
Pen1-JCasp 10 nM (7/4) vs. ACSF (9/5)	-0.994	-74.31 to 72.32	No	ns
Pen1-JCasp 10 nM (7/4) vs. Pen1-JCasp 1000 nM (13/7)	-145	-213.2 to -76.81	Yes	****
Pen1-JCasp 10 nM (7/4) vs. Pen1-SCJCasp 1000 nM (7/4)	13.64	-64.13 to 91.41	No	ns
ACSF (9/5) vs. Pen1-JCasp 1000 nM (13/7)	-144	-207.1 to -80.93	Yes	****
ACSF (9/5) vs. Pen1-SCJCasp 1000 nM (7/4)	14.64	-58.68 to 87.95	No	ns
Pen1-JCasp 1000 nM (13/7) vs. Pen1-SCJCasp 1000 nM (7/4)	158.7	90.45 to 226.9	Yes	****
Row 8
Pen1-JCasp 100 nM (14/7) vs. Pen1-JCasp 10 nM (7/4)	44.7	-22.65 to 112.0	No	ns
Pen1-JCasp 100 nM (14/7) vs. ACSF (9/5)	50.54	-11.62 to 112.7	No	ns
Pen1-JCasp 100 nM (14/7) vs. Pen1-JCasp 1000 nM (13/7)	-97.92	-154.0 to -41.88	Yes	****
Pen1-JCasp 100 nM (14/7) vs. Pen1-SCJCasp 1000 nM (7/4)	66.5	-0.8463 to 133.8	No	ns
Pen1-JCasp 10 nM (7/4) vs. ACSF (9/5)	5.838	-67.48 to 79.16	No	ns
Pen1-JCasp 10 nM (7/4) vs. Pen1-JCasp 1000 nM (13/7)	-142.6	-210.8 to -74.41	Yes	****
Pen1-JCasp 10 nM (7/4) vs. Pen1-SCJCasp 1000 nM (7/4)	21.8	-55.96 to 99.57	No	ns
ACSF (9/5) vs. Pen1-JCasp 1000 nM (13/7)	-148.5	-211.5 to -85.37	Yes	****
ACSF (9/5) vs. Pen1-SCJCasp 1000 nM (7/4)	15.96	-57.35 to 89.28	No	ns
Pen1-JCasp 1000 nM (13/7) vs. Pen1-SCJCasp 1000 nM (7/4)	164.4	96.22 to 232.6	Yes	****
Row 9
Pen1-JCasp 100 nM (14/7) vs. Pen1-JCasp 10 nM (7/4)	48.31	-19.04 to 115.7	No	ns
Pen1-JCasp 100 nM (14/7) vs. ACSF (9/5)	53.79	-8.373 to 115.9	No	ns
Pen1-JCasp 100 nM (14/7) vs. Pen1-JCasp 1000 nM (13/7)	-97.56	-153.6 to -41.52	Yes	****
Pen1-JCasp 100 nM (14/7) vs. Pen1-SCJCasp 1000 nM (7/4)	65.93	-1.420 to 133.3	No	ns
Pen1-JCasp 10 nM (7/4) vs. ACSF (9/5)	5.476	-67.84 to 78.79	No	ns
Pen1-JCasp 10 nM (7/4) vs. Pen1-JCasp 1000 nM (13/7)	-145.9	-214.1 to -77.66	Yes	****
Pen1-JCasp 10 nM (7/4) vs. Pen1-SCJCasp 1000 nM (7/4)	17.62	-60.15 to 95.38	No	ns
ACSF (9/5) vs. Pen1-JCasp 1000 nM (13/7)	-151.3	-214.4 to -88.26	Yes	****
ACSF (9/5) vs. Pen1-SCJCasp 1000 nM (7/4)	12.14	-61.18 to 85.46	No	ns
Pen1-JCasp 1000 nM (13/7) vs. Pen1-SCJCasp 1000 nM (7/4)	163.5	95.28 to 231.7	Yes	****
Row 10
Pen1-JCasp 100 nM (14/7) vs. Pen1-JCasp 10 nM (7/4)	49.48	-17.87 to 116.8	No	ns
Pen1-JCasp 100 nM (14/7) vs. ACSF (9/5)	55.62	-6.539 to 117.8	No	ns
Pen1-JCasp 100 nM (14/7) vs. Pen1-JCasp 1000 nM (13/7)	-92.57	-148.6 to -36.53	Yes	****
Pen1-JCasp 100 nM (14/7) vs. Pen1-SCJCasp 1000 nM (7/4)	70.94	3.594 to 138.3	Yes	*
Pen1-JCasp 10 nM (7/4) vs. ACSF (9/5)	6.141	-67.18 to 79.46	No	ns
Pen1-JCasp 10 nM (7/4) vs. Pen1-JCasp 1000 nM (13/7)	-142	-210.3 to -73.84	Yes	****
Pen1-JCasp 10 nM (7/4) vs. Pen1-SCJCasp 1000 nM (7/4)	21.46	-56.30 to 99.23	No	ns
ACSF (9/5) vs. Pen1-JCasp 1000 nM (13/7)	-148.2	-211.3 to -85.10	Yes	****
ACSF (9/5) vs. Pen1-SCJCasp 1000 nM (7/4)	15.32	-58.00 to 88.64	No	ns
Pen1-JCasp 1000 nM (13/7) vs. Pen1-SCJCasp 1000 nM (7/4)	163.5	95.30 to 231.7	Yes	****
Test details	Mean 1	Mean 2	Mean Diff.	SE of diff.	N1	N2	q	DF
Row 2
Pen1-JCasp 100 nM (14/7) vs. Pen1-JCasp 10 nM (7/4)	193.2	181.4	11.87	24.58	14	7	0.683	405
Pen1-JCasp 100 nM (14/7) vs. ACSF (9/5)	193.2	171.7	21.54	22.68	14	9	1.343	405
Pen1-JCasp 100 nM (14/7) vs. Pen1-JCasp 1000 nM (13/7)	193.2	230.7	-37.47	20.45	14	13	2.591	405
Pen1-JCasp 100 nM (14/7) vs. Pen1-SCJCasp 1000 nM (7/4)	193.2	166.3	26.99	24.58	14	7	1.553	405
Pen1-JCasp 10 nM (7/4) vs. ACSF (9/5)	181.4	171.7	9.671	26.76	7	9	0.5112	405
Pen1-JCasp 10 nM (7/4) vs. Pen1-JCasp 1000 nM (13/7)	181.4	230.7	-49.34	24.89	7	13	2.803	405
Pen1-JCasp 10 nM (7/4) vs. Pen1-SCJCasp 1000 nM (7/4)	181.4	166.3	15.12	28.38	7	7	0.7533	405
ACSF (9/5) vs. Pen1-JCasp 1000 nM (13/7)	171.7	230.7	-59.01	23.02	9	13	3.625	405
ACSF (9/5) vs. Pen1-SCJCasp 1000 nM (7/4)	171.7	166.3	5.446	26.76	9	7	0.2879	405
Pen1-JCasp 1000 nM (13/7) vs. Pen1-SCJCasp 1000 nM (7/4)	230.7	166.3	64.46	24.89	13	7	3.662	405
Row 3
Pen1-JCasp 100 nM (14/7) vs. Pen1-JCasp 10 nM (7/4)	207.3	175.6	31.64	24.58	14	7	1.821	405
Pen1-JCasp 100 nM (14/7) vs. ACSF (9/5)	207.3	173.1	34.11	22.68	14	9	2.127	405
Pen1-JCasp 100 nM (14/7) vs. Pen1-JCasp 1000 nM (13/7)	207.3	282.1	-74.84	20.45	14	13	5.175	405
Pen1-JCasp 100 nM (14/7) vs. Pen1-SCJCasp 1000 nM (7/4)	207.3	159.6	47.67	24.58	14	7	2.743	405
Pen1-JCasp 10 nM (7/4) vs. ACSF (9/5)	175.6	173.1	2.47	26.76	7	9	0.1305	405
Pen1-JCasp 10 nM (7/4) vs. Pen1-JCasp 1000 nM (13/7)	175.6	282.1	-106.5	24.89	7	13	6.05	405
Pen1-JCasp 10 nM (7/4) vs. Pen1-SCJCasp 1000 nM (7/4)	175.6	159.6	16.03	28.38	7	7	0.7986	405
ACSF (9/5) vs. Pen1-JCasp 1000 nM (13/7)	173.1	282.1	-109	23.02	9	13	6.692	405
ACSF (9/5) vs. Pen1-SCJCasp 1000 nM (7/4)	173.1	159.6	13.56	26.76	9	7	0.7165	405
Pen1-JCasp 1000 nM (13/7) vs. Pen1-SCJCasp 1000 nM (7/4)	282.1	159.6	122.5	24.89	13	7	6.96	405
Row 4
Pen1-JCasp 100 nM (14/7) vs. Pen1-JCasp 10 nM (7/4)	198.6	164.6	33.97	24.58	14	7	1.955	405
Pen1-JCasp 100 nM (14/7) vs. ACSF (9/5)	198.6	163.8	34.84	22.68	14	9	2.172	405
Pen1-JCasp 100 nM (14/7) vs. Pen1-JCasp 1000 nM (13/7)	198.6	293.2	-94.61	20.45	14	13	6.542	405
Pen1-JCasp 100 nM (14/7) vs. Pen1-SCJCasp 1000 nM (7/4)	198.6	150.8	47.81	24.58	14	7	2.751	405
Pen1-JCasp 10 nM (7/4) vs. ACSF (9/5)	164.6	163.8	0.8634	26.76	7	9	0.04563	405
Pen1-JCasp 10 nM (7/4) vs. Pen1-JCasp 1000 nM (13/7)	164.6	293.2	-128.6	24.89	7	13	7.305	405
Pen1-JCasp 10 nM (7/4) vs. Pen1-SCJCasp 1000 nM (7/4)	164.6	150.8	13.84	28.38	7	7	0.6895	405
ACSF (9/5) vs. Pen1-JCasp 1000 nM (13/7)	163.8	293.2	-129.4	23.02	9	13	7.951	405
ACSF (9/5) vs. Pen1-SCJCasp 1000 nM (7/4)	163.8	150.8	12.97	26.76	9	7	0.6856	405
Pen1-JCasp 1000 nM (13/7) vs. Pen1-SCJCasp 1000 nM (7/4)	293.2	150.8	142.4	24.89	13	7	8.091	405
Row 5
Pen1-JCasp 100 nM (14/7) vs. Pen1-JCasp 10 nM (7/4)	196.1	159.8	36.27	24.58	14	7	2.087	405
Pen1-JCasp 100 nM (14/7) vs. ACSF (9/5)	196.1	151.8	44.24	22.68	14	9	2.758	405
Pen1-JCasp 100 nM (14/7) vs. Pen1-JCasp 1000 nM (13/7)	196.1	295.7	-99.67	20.45	14	13	6.892	405
Pen1-JCasp 100 nM (14/7) vs. Pen1-SCJCasp 1000 nM (7/4)	196.1	138.8	57.25	24.58	14	7	3.294	405
Pen1-JCasp 10 nM (7/4) vs. ACSF (9/5)	159.8	151.8	7.975	26.76	7	9	0.4215	405
Pen1-JCasp 10 nM (7/4) vs. Pen1-JCasp 1000 nM (13/7)	159.8	295.7	-135.9	24.89	7	13	7.723	405
Pen1-JCasp 10 nM (7/4) vs. Pen1-SCJCasp 1000 nM (7/4)	159.8	138.8	20.98	28.38	7	7	1.046	405
ACSF (9/5) vs. Pen1-JCasp 1000 nM (13/7)	151.8	295.7	-143.9	23.02	9	13	8.84	405
ACSF (9/5) vs. Pen1-SCJCasp 1000 nM (7/4)	151.8	138.8	13.01	26.76	9	7	0.6876	405
Pen1-JCasp 1000 nM (13/7) vs. Pen1-SCJCasp 1000 nM (7/4)	295.7	138.8	156.9	24.89	13	7	8.915	405
Row 6
Pen1-JCasp 100 nM (14/7) vs. Pen1-JCasp 10 nM (7/4)	189.9	147.6	42.3	24.58	14	7	2.434	405
Pen1-JCasp 100 nM (14/7) vs. ACSF (9/5)	189.9	150.6	39.21	22.68	14	9	2.445	405
Pen1-JCasp 100 nM (14/7) vs. Pen1-JCasp 1000 nM (13/7)	189.9	291.5	-101.7	20.45	14	13	7.03	405
Pen1-JCasp 100 nM (14/7) vs. Pen1-SCJCasp 1000 nM (7/4)	189.9	135.9	53.97	24.58	14	7	3.105	405
Pen1-JCasp 10 nM (7/4) vs. ACSF (9/5)	147.6	150.6	-3.083	26.76	7	9	0.163	405
Pen1-JCasp 10 nM (7/4) vs. Pen1-JCasp 1000 nM (13/7)	147.6	291.5	-144	24.89	7	13	8.179	405
Pen1-JCasp 10 nM (7/4) vs. Pen1-SCJCasp 1000 nM (7/4)	147.6	135.9	11.67	28.38	7	7	0.5816	405
ACSF (9/5) vs. Pen1-JCasp 1000 nM (13/7)	150.6	291.5	-140.9	23.02	9	13	8.653	405
ACSF (9/5) vs. Pen1-SCJCasp 1000 nM (7/4)	150.6	135.9	14.76	26.76	9	7	0.7799	405
Pen1-JCasp 1000 nM (13/7) vs. Pen1-SCJCasp 1000 nM (7/4)	291.5	135.9	155.6	24.89	13	7	8.842	405
Row 7
Pen1-JCasp 100 nM (14/7) vs. Pen1-JCasp 10 nM (7/4)	191.2	144.4	46.79	24.58	14	7	2.692	405
Pen1-JCasp 100 nM (14/7) vs. ACSF (9/5)	191.2	145.4	45.79	22.68	14	9	2.855	405
Pen1-JCasp 100 nM (14/7) vs. Pen1-JCasp 1000 nM (13/7)	191.2	289.4	-98.23	20.45	14	13	6.793	405
Pen1-JCasp 100 nM (14/7) vs. Pen1-SCJCasp 1000 nM (7/4)	191.2	130.8	60.43	24.58	14	7	3.477	405
Pen1-JCasp 10 nM (7/4) vs. ACSF (9/5)	144.4	145.4	-0.994	26.76	7	9	0.05254	405
Pen1-JCasp 10 nM (7/4) vs. Pen1-JCasp 1000 nM (13/7)	144.4	289.4	-145	24.89	7	13	8.239	405
Pen1-JCasp 10 nM (7/4) vs. Pen1-SCJCasp 1000 nM (7/4)	144.4	130.8	13.64	28.38	7	7	0.6797	405
ACSF (9/5) vs. Pen1-JCasp 1000 nM (13/7)	145.4	289.4	-144	23.02	9	13	8.846	405
ACSF (9/5) vs. Pen1-SCJCasp 1000 nM (7/4)	145.4	130.8	14.64	26.76	9	7	0.7735	405
Pen1-JCasp 1000 nM (13/7) vs. Pen1-SCJCasp 1000 nM (7/4)	289.4	130.8	158.7	24.89	13	7	9.014	405
Row 8
Pen1-JCasp 100 nM (14/7) vs. Pen1-JCasp 10 nM (7/4)	191.1	146.4	44.7	24.58	14	7	2.572	405
Pen1-JCasp 100 nM (14/7) vs. ACSF (9/5)	191.1	140.6	50.54	22.68	14	9	3.151	405
Pen1-JCasp 100 nM (14/7) vs. Pen1-JCasp 1000 nM (13/7)	191.1	289	-97.92	20.45	14	13	6.772	405
Pen1-JCasp 100 nM (14/7) vs. Pen1-SCJCasp 1000 nM (7/4)	191.1	124.6	66.5	24.58	14	7	3.826	405
Pen1-JCasp 10 nM (7/4) vs. ACSF (9/5)	146.4	140.6	5.838	26.76	7	9	0.3086	405
Pen1-JCasp 10 nM (7/4) vs. Pen1-JCasp 1000 nM (13/7)	146.4	289	-142.6	24.89	7	13	8.103	405
Pen1-JCasp 10 nM (7/4) vs. Pen1-SCJCasp 1000 nM (7/4)	146.4	124.6	21.8	28.38	7	7	1.086	405
ACSF (9/5) vs. Pen1-JCasp 1000 nM (13/7)	140.6	289	-148.5	23.02	9	13	9.119	405
ACSF (9/5) vs. Pen1-SCJCasp 1000 nM (7/4)	140.6	124.6	15.96	26.76	9	7	0.8438	405
Pen1-JCasp 1000 nM (13/7) vs. Pen1-SCJCasp 1000 nM (7/4)	289	124.6	164.4	24.89	13	7	9.342	405
Row 9
Pen1-JCasp 100 nM (14/7) vs. Pen1-JCasp 10 nM (7/4)	187.5	139.2	48.31	24.58	14	7	2.78	405
Pen1-JCasp 100 nM (14/7) vs. ACSF (9/5)	187.5	133.7	53.79	22.68	14	9	3.353	405
Pen1-JCasp 100 nM (14/7) vs. Pen1-JCasp 1000 nM (13/7)	187.5	285.1	-97.56	20.45	14	13	6.746	405
Pen1-JCasp 100 nM (14/7) vs. Pen1-SCJCasp 1000 nM (7/4)	187.5	121.6	65.93	24.58	14	7	3.793	405
Pen1-JCasp 10 nM (7/4) vs. ACSF (9/5)	139.2	133.7	5.476	26.76	7	9	0.2894	405
Pen1-JCasp 10 nM (7/4) vs. Pen1-JCasp 1000 nM (13/7)	139.2	285.1	-145.9	24.89	7	13	8.287	405
Pen1-JCasp 10 nM (7/4) vs. Pen1-SCJCasp 1000 nM (7/4)	139.2	121.6	17.62	28.38	7	7	0.8778	405
ACSF (9/5) vs. Pen1-JCasp 1000 nM (13/7)	133.7	285.1	-151.3	23.02	9	13	9.296	405
ACSF (9/5) vs. Pen1-SCJCasp 1000 nM (7/4)	133.7	121.6	12.14	26.76	9	7	0.6417	405
Pen1-JCasp 1000 nM (13/7) vs. Pen1-SCJCasp 1000 nM (7/4)	285.1	121.6	163.5	24.89	13	7	9.288	405
Row 10
Pen1-JCasp 100 nM (14/7) vs. Pen1-JCasp 10 nM (7/4)	187.7	138.2	49.48	24.58	14	7	2.847	405
Pen1-JCasp 100 nM (14/7) vs. ACSF (9/5)	187.7	132.1	55.62	22.68	14	9	3.467	405
Pen1-JCasp 100 nM (14/7) vs. Pen1-JCasp 1000 nM (13/7)	187.7	280.2	-92.57	20.45	14	13	6.401	405
Pen1-JCasp 100 nM (14/7) vs. Pen1-SCJCasp 1000 nM (7/4)	187.7	116.7	70.94	24.58	14	7	4.082	405
Pen1-JCasp 10 nM (7/4) vs. ACSF (9/5)	138.2	132.1	6.141	26.76	7	9	0.3246	405
Pen1-JCasp 10 nM (7/4) vs. Pen1-JCasp 1000 nM (13/7)	138.2	280.2	-142	24.89	7	13	8.07	405
Pen1-JCasp 10 nM (7/4) vs. Pen1-SCJCasp 1000 nM (7/4)	138.2	116.7	21.46	28.38	7	7	1.07	405
ACSF (9/5) vs. Pen1-JCasp 1000 nM (13/7)	132.1	280.2	-148.2	23.02	9	13	9.102	405
ACSF (9/5) vs. Pen1-SCJCasp 1000 nM (7/4)	132.1	116.7	15.32	26.76	9	7	0.8098	405
Pen1-JCasp 1000 nM (13/7) vs. Pen1-SCJCasp 1000 nM (7/4)	280.2	116.7	163.5	24.89	13	7	9.29	405
Pen1-JCasp 100 nM (14/7) vs. Pen1-JCasp 10 nM (7/4)	187.5	139.2	48.31	23.32	14	7	2.93	450
Pen1-JCasp 100 nM (14/7) vs. ACSF (9/5)	187.5	133.7	53.79	21.52	14	9	3.535	450
Pen1-JCasp 100 nM (14/7) vs. Pen1-JCasp 1000 nM (13/7)	187.5	285.1	-97.56	19.4	14	13	7.111	450
Pen1-JCasp 100 nM (14/7) vs. Pen1-SCJCasp 1000 nM (7/4)	187.5	121.6	65.93	23.32	14	7	3.999	450
Pen1-JCasp 10 nM (7/4) vs. ACSF (9/5)	139.2	133.7	5.476	25.38	7	9	0.3051	450
Pen1-JCasp 10 nM (7/4) vs. Pen1-JCasp 1000 nM (13/7)	139.2	285.1	-145.9	23.61	7	13	8.736	450
Pen1-JCasp 10 nM (7/4) vs. Pen1-SCJCasp 1000 nM (7/4)	139.2	121.6	17.62	26.92	7	7	0.9253	450
ACSF (9/5) vs. Pen1-JCasp 1000 nM (13/7)	133.7	285.1	-151.3	21.84	9	13	9.799	450
ACSF (9/5) vs. Pen1-SCJCasp 1000 nM (7/4)	133.7	121.6	12.14	25.38	9	7	0.6764	450
Pen1-JCasp 1000 nM (13/7) vs. Pen1-SCJCasp 1000 nM (7/4)	285.1	121.6	163.5	23.61	13	7	9.791	450
fEPSP10/fEPSP1 X 100
Pen1-JCasp 100 nM (14/7) vs. Pen1-JCasp 10 nM (7/4)	187.7	138.2	49.48	23.32	14	7	3.001	450
Pen1-JCasp 100 nM (14/7) vs. ACSF (9/5)	187.7	132.1	55.62	21.52	14	9	3.655	450
Pen1-JCasp 100 nM (14/7) vs. Pen1-JCasp 1000 nM (13/7)	187.7	280.2	-92.57	19.4	14	13	6.747	450
Pen1-JCasp 100 nM (14/7) vs. Pen1-SCJCasp 1000 nM (7/4)	187.7	116.7	70.94	23.32	14	7	4.303	450
Pen1-JCasp 10 nM (7/4) vs. ACSF (9/5)	138.2	132.1	6.141	25.38	7	9	0.3421	450
Pen1-JCasp 10 nM (7/4) vs. Pen1-JCasp 1000 nM (13/7)	138.2	280.2	-142	23.61	7	13	8.507	450
Pen1-JCasp 10 nM (7/4) vs. Pen1-SCJCasp 1000 nM (7/4)	138.2	116.7	21.46	26.92	7	7	1.127	450
ACSF (9/5) vs. Pen1-JCasp 1000 nM (13/7)	132.1	280.2	-148.2	21.84	9	13	9.595	450
ACSF (9/5) vs. Pen1-SCJCasp 1000 nM (7/4)	132.1	116.7	15.32	25.38	9	7	0.8536	450
Pen1-JCasp 1000 nM (13/7) vs. Pen1-SCJCasp 1000 nM (7/4)	280.2	116.7	163.5	23.61	13	7	9.792	450

## Sheet: main Treatment effect
Compare TREATMENT means (main TREATMENT effect)
Number of families	1
Number of comparisons per family	10
Alpha	0.05
Tukey's multiple comparisons test	Mean Diff.	95% CI of diff.	Significant?	Summary
Pen1-JCasp 100 nM (14/7) vs. Pen1-JCasp 10 nM (7/4)	38.37	-26.14 to 102.9	No	ns
Pen1-JCasp 100 nM (14/7) vs. ACSF (9/5)	42.19	-17.35 to 101.7	No	ns
Pen1-JCasp 100 nM (14/7) vs. Pen1-JCasp 1000 nM (13/7)	-88.28	-142.0 to -34.60	Yes	***
Pen1-JCasp 100 nM (14/7) vs. Pen1-SCJCasp 1000 nM (7/4)	55.28	-9.234 to 119.8	No	ns
Pen1-JCasp 10 nM (7/4) vs. ACSF (9/5)	3.817	-66.41 to 74.05	No	ns
Pen1-JCasp 10 nM (7/4) vs. Pen1-JCasp 1000 nM (13/7)	-126.6	-192.0 to -61.32	Yes	****
Pen1-JCasp 10 nM (7/4) vs. Pen1-SCJCasp 1000 nM (7/4)	16.91	-57.58 to 91.40	No	ns
ACSF (9/5) vs. Pen1-JCasp 1000 nM (13/7)	-130.5	-190.9 to -70.04	Yes	****
ACSF (9/5) vs. Pen1-SCJCasp 1000 nM (7/4)	13.09	-57.14 to 83.32	No	ns
Pen1-JCasp 1000 nM (13/7) vs. Pen1-SCJCasp 1000 nM (7/4)	143.6	78.22 to 208.9	Yes	****
Test details	Mean 1	Mean 2	Mean Diff.	SE of diff.	N1	N2	q	DF
Pen1-JCasp 100 nM (14/7) vs. Pen1-JCasp 10 nM (7/4)	193.6	155.2	38.37	22.7	126	63	2.39	45
Pen1-JCasp 100 nM (14/7) vs. ACSF (9/5)	193.6	151.4	42.19	20.95	126	81	2.847	45
Pen1-JCasp 100 nM (14/7) vs. Pen1-JCasp 1000 nM (13/7)	193.6	281.9	-88.28	18.89	126	117	6.609	45
Pen1-JCasp 100 nM (14/7) vs. Pen1-SCJCasp 1000 nM (7/4)	193.6	138.3	55.28	22.7	126	63	3.443	45
Pen1-JCasp 10 nM (7/4) vs. ACSF (9/5)	155.2	151.4	3.817	24.72	63	81	0.2184	45
Pen1-JCasp 10 nM (7/4) vs. Pen1-JCasp 1000 nM (13/7)	155.2	281.9	-126.6	22.99	63	117	7.79	45
Pen1-JCasp 10 nM (7/4) vs. Pen1-SCJCasp 1000 nM (7/4)	155.2	138.3	16.91	26.22	63	63	0.912	45
ACSF (9/5) vs. Pen1-JCasp 1000 nM (13/7)	151.4	281.9	-130.5	21.27	81	117	8.676	45
ACSF (9/5) vs. Pen1-SCJCasp 1000 nM (7/4)	151.4	138.3	13.09	24.72	81	63	0.7489	45
Pen1-JCasp 1000 nM (13/7) vs. Pen1-SCJCasp 1000 nM (7/4)	281.9	138.3	143.6	22.99	117	63	8.83	45
