# Supplementary material for: APP and APLP2 interact with the synaptic release machinery and facilitate transmitter release at hippocampal synapses
Source: eLife. 2015 Nov 9;4:e09743. doi: 10.7554/eLife.09743 (PMC4755753; doi:10.7554/eLife.09743)
Supplement: Figure 4—source data 1. — DOI: http://dx.doi.org/10.7554/eLife.09743.014 [file elife-09743-fig4-data1.xlsx]

## Sheet: Paired t test
Table Analyzed	Frequency
Column B	Pen1-JCasp 1μM (10/3)
vs.	vs.
Column A	Pen1-ScJCasp 1μM (10/3)
			P value summary	Significant?
Paired t test			*	Yes
P value	0.0066		****	Yes
P value summary	**		*	Yes
Significantly different? (P < 0.05)	Yes		****	Yes
One- or two-tailed P value?	Two-tailed
t, df	t=3.513 df=9		MS	F (DFn, DFd)	P value
Number of pairs	10		93.38	F (9, 270) = 2.451	P = 0.0107
			8261	F (9, 270) = 216.8	P < 0.0001
How big is the difference?			3893	F (1, 30) = 4.462	P = 0.0431
Mean of differences	-0.2577		872.3	F (30, 270) = 22.89	P < 0.0001
SD of differences	0.232		38.11
SEM of differences	0.07338
95% confidence interval	-0.4237 to -0.09175
R squared	0.5782
How effective was the pairing?
Correlation coefficient (r)	0.08654
P value (one tailed)	0.4061
P value summary	ns
Was the pairing significantly effective?	No
