# Supplementary material for: APP and APLP2 interact with the synaptic release machinery and facilitate transmitter release at hippocampal synapses
Source: eLife. 2015 Nov 9;4:e09743. doi: 10.7554/eLife.09743 (PMC4755753; doi:10.7554/eLife.09743)
Supplement: Figure 5—source data 1. — DOI: http://dx.doi.org/10.7554/eLife.09743.016 [file elife-09743-fig5-data1.xlsx]

## Sheet: 2way ANOVA of depletion
Table Analyzed	Train Depletion C57
Two-way RM ANOVA	Matching: Stacked
Alpha	0.05
Source of Variation	% of total variation	P value	P value summary	Significant?
Interaction	7.128	< 0.0001	****	Yes
Stimulus number	40.65	< 0.0001	****	Yes
Treatment	16.55	< 0.0001	****	Yes
Subjects (matching)	10.98	< 0.0001	****	Yes
ANOVA table	SS	DF	MS	F (DFn, DFd)	P value
Interaction	536921	998	538	F (998, 12475) = 6.702	P < 0.0001
Time	3062000	499	6137	F (499, 12475) = 76.45	P < 0.0001
Column Factor	1247000	2	623504	F (2, 25) = 18.84	P < 0.0001
Subjects (matching)	827381	25	33095	F (25, 12475) = 412.3	P < 0.0001
Residual	1001000	12475	80.28
Number of missing values	0

## Sheet: Tukey's mult. comp. test
Compare treatment means (main treatment effect)
Number of families	1
Number of comparisons per family	3
Alpha	0.05
Tukey's multiple comparisons test	Mean Diff.	95% CI of diff.	Significant?	Summary
ACSF vs. ASIR 1μM	-16.76	-25.87 to -7.656	Yes	***
ACSF vs. ASIR SC 1μM	4.115	-6.373 to 14.60	No	ns
ASIR 1μM vs. ASIR SC 1μM	20.88	11.38 to 30.38	Yes	****
Test details	Mean 1	Mean 2	Mean Diff.	SE of diff.	N1	N2	q	DF
ACSF vs. ASIR 1μM	15.33	32.09	-16.76	3.656	4000	6500	6.484	25
ACSF vs. ASIR SC 1μM	15.33	11.21	4.115	4.211	4000	3500	1.382	25
ASIR 1μM vs. ASIR SC 1μM	32.09	11.21	20.88	3.814	6500	3500	7.741	25

## Sheet: NonLin fit
Best-fit values
Y0	139.3	181.5	131.9
Plateau	12.1	25.2	9.276
K	0.0758	0.04437	0.1193
Half Life	9.144	15.62	5.809
Tau	13.19	22.54	8.381
Span	127.2	156.3	122.6
Std. Error
Y0	1.767	1.964	1.689
Plateau	0.1398	0.2185	0.0997
K	0.001469	0.0008062	0.00222		P value
Span	1.76	1.949	1.684		P < 0.0001
95% Confidence Intervals					P < 0.0001
Y0	135.8 to 142.7	177.7 to 185.4	128.6 to 135.2		P < 0.0001
Plateau	11.82 to 12.37	24.77 to 25.63	9.081 to 9.472		P < 0.0001
K	0.07292 to 0.07868	0.04279 to 0.04595	0.1150 to 0.1237
Half Life	8.810 to 9.506	15.08 to 16.20	5.605 to 6.029
Tau	12.71 to 13.71	21.76 to 23.37	8.086 to 8.698
Span	123.7 to 130.6	152.5 to 160.1	119.3 to 125.9
Goodness of Fit
Degrees of Freedom	3997	6497	3497
R square	0.728	0.6533	0.7688
Absolute Sum of Squares	279591	1653000	113487
Sy.x	8.364	15.95	5.697
Constraints
K	K > 0.0	K > 0.0	K > 0.0
Number of points
Analyzed	4000	6500	3500
