# Supplementary material for: APP and APLP2 interact with the synaptic release machinery and facilitate transmitter release at hippocampal synapses
Source: eLife. 2015 Nov 9;4:e09743. doi: 10.7554/eLife.09743 (PMC4755753; doi:10.7554/eLife.09743)
Supplement: Figure 5—source data 2. — DOI: http://dx.doi.org/10.7554/eLife.09743.017 [file elife-09743-fig5-data2.xlsx]

## Sheet: 2way ANOVA of depletion
Table Analyzed	*Train Depletion log 10
Two-way RM ANOVA	Matching: Stacked
Alpha	0.05
Source of Variation	% of total variation	P value	P value summary	Significant?
Interaction	4.873	< 0.0001	****	Yes
Stimulus number	41.52	< 0.0001	****	Yes
Treatment	9.333	0.0136	*	Yes
Subjects (matching)	25.99	< 0.0001	****	Yes
ANOVA table	SS	DF	MS	F (DFn, DFd)	P value
Interaction	242254	998	242.7	F (998, 13972) = 4.923	P < 0.0001
Stimulus number	2064000	499	4137	F (499, 13972) = 83.89	P < 0.0001
Treatment	463942	2	231971	F (2, 28) = 5.027	P = 0.0136
Subjects (matching)	1292000	28	46141	F (28, 13972) = 935.7	P < 0.0001
Residual	688953	13972	49.31
Number of missing values	0

## Sheet: Tukey's mult. comp. test
Compare column means (main column effect)
Number of families	1
Number of comparisons per family	3
Alpha	0.05
Tukey's multiple comparisons test	Mean Diff.	95% CI of diff.	Significant?	Summary
ACSF (8/4) vs. ACSF+Pen1-ScJCasp 1 μM (13/5)	1.061	-9.983 to 12.11	No	ns
ACSF (8/4) vs. ACSF+Pen1-JCasp 1 μM (12/4)	-10.59	-21.44 to 0.2632	No	ns
ACSF+Pen1-ScJCasp 1 μM (13/5) vs. ACSF+Pen1-JCasp 1 μM (12/4)	-11.65	-21.57 to -1.725	Yes	*
Test details	Mean 1	Mean 2	Mean Diff.	SE of diff.	N1	N2	q	DF
ACSF (8/4) vs. ACSF+Pen1-ScJCasp 1 μM (13/5)	12.4	11.34	1.061	4.464	4000	5500	0.3363	28
ACSF (8/4) vs. ACSF+Pen1-JCasp 1 μM (12/4)	12.4	22.98	-10.59	4.385	4000	6000	3.414	28
ACSF+Pen1-ScJCasp 1 μM (13/5) vs. ACSF+Pen1-JCasp 1 μM (12/4)	11.34	22.98	-11.65	4.01	5500	6000	4.108	28

## Sheet: NonLin fit
One phase decay
Best-fit values
Y0	119.8	124	139
Plateau	10.83	9.318	18.45
K	0.1297	0.1076	0.05179
Half Life	5.342	6.439	13.38
Tau	7.708	9.29	19.31
Span	108.9	114.7	120.5
Std. Error
Y0	2.499	1.407	2.297
Plateau	0.1395	0.0889	0.2314
K	0.003993	0.001798	0.001411
Span	2.493	1.403	2.283
95% Confidence Intervals
Y0	114.9 to 124.7	121.3 to 126.8	134.5 to 143.5
Plateau	10.55 to 11.10	9.144 to 9.492	17.99 to 18.90
K	0.1219 to 0.1376	0.1041 to 0.1112	0.04902 to 0.05455
Half Life	5.039 to 5.685	6.235 to 6.657	12.71 to 14.14
Tau	7.269 to 8.202	8.995 to 9.604	18.33 to 20.40
Span	104.1 to 113.8	112.0 to 117.5	116.1 to 125.0
Goodness of Fit
Degrees of Freedom	3997	5497	5997
R square	0.5155	0.724	0.4751
Absolute Sum of Squares	291982	221184	1629000
Sy.x	8.547	6.343	16.48
Constraints
K	K > 0.0	K > 0.0	K > 0.0
Number of points
Analyzed	4000	5500	6000
