# Supplementary material for: APP and APLP2 interact with the synaptic release machinery and facilitate transmitter release at hippocampal synapses
Source: eLife. 2015 Nov 9;4:e09743. doi: 10.7554/eLife.09743 (PMC4755753; doi:10.7554/eLife.09743)
Supplement: Figure 7—source data 1. — DOI: http://dx.doi.org/10.7554/eLife.09743.020 [file elife-09743-fig7-data1.xlsx]

## Sheet: One-way ANOVA of I-O
Table Analyzed	Data I/o slopes
ANOVA summary
F	6.555
P value	0.0058
P value summary	**
Are differences among means statistically significant? (P < 0.05)	Yes
R square	0.3734
Brown-Forsythe test
F (DFn, DFd)	1.389 (2, 22)
P value	0.2704
P value summary	ns
Significantly different standard deviations? (P < 0.05)	No
Bartlett's test
Bartlett's statistic (corrected)	1.955
P value	0.3762
P value summary	ns
Significantly different standard deviations? (P < 0.05)	No
ANOVA table	SS	DF	MS	F (DFn, DFd)	P value
Treatment (between columns)	103.1	2	51.55	F (2, 22) = 6.555	P = 0.0058
Residual (within columns)	173	22	7.863
Total	276.1	24
Data summary
Number of treatments (columns)	3
Number of values (total)	25

## Sheet: Tukey's mult. comp. test
Number of families	1
Number of comparisons per family	3
Alpha	0.05
Tukey's multiple comparisons test	Mean Diff.	95% CI of diff.	Significant?	Summary
ACSF (6/6) vs. ACSF+JCasp 1 μM (9/6)	0.07824	-3.634 to 3.791	No	ns		A-B
ACSF (6/6) vs. ACSF+Pen1-JCasp 1 μM (10/6)	4.192	0.5541 to 7.829	Yes	*		A-C
ACSF+JCasp 1 μM (9/6) vs. ACSF+Pen1-JCasp 1 μM (10/6)	4.113	0.8769 to 7.350	Yes	*		B-C
Test details	Mean 1	Mean 2	Mean Diff.	SE of diff.	n1	n2	q	DF
ACSF (6/6) vs. ACSF+JCasp 1 μM (9/6)	8.525	8.447	0.07824	1.478	6	9	0.07486	22
ACSF (6/6) vs. ACSF+Pen1-JCasp 1 μM (10/6)	8.525	4.334	4.192	1.448	6	10	4.094	22
ACSF+JCasp 1 μM (9/6) vs. ACSF+Pen1-JCasp 1 μM (10/6)	8.447	4.334	4.113	1.288	9	10	4.515	22
