# Supplementary material for: APP and APLP2 interact with the synaptic release machinery and facilitate transmitter release at hippocampal synapses
Source: eLife. 2015 Nov 9;4:e09743. doi: 10.7554/eLife.09743 (PMC4755753; doi:10.7554/eLife.09743)
Supplement: Figure 7—source data 2. — DOI: http://dx.doi.org/10.7554/eLife.09743.021 [file elife-09743-fig7-data2.xlsx]

## Sheet: 2way ANOVA of PPR
Table Analyzed	PPR
Two-way RM ANOVA	Matching: Stacked
Alpha	0.05
Source of Variation	% of total variation	P value	P value summary	Significant?
Interaction	2.277	0.0041	**	Yes
Interstimulus interval	59.06	< 0.0001	****	Yes
peptide	14.54	< 0.0001	****	Yes
Subjects (matching)	9.553	< 0.0001	****	Yes
ANOVA table	SS	DF	MS	F (DFn, DFd)	P value
Interaction	0.8489	8	0.1061	F (8, 88) = 3.081	P = 0.0041
Interstimulus interval	22.02	4	5.504	F (4, 88) = 159.8	P < 0.0001
peptide	5.419	2	2.709	F (2, 22) = 16.74	P < 0.0001
Subjects (matching)	3.561	22	0.1619	F (22, 88) = 4.701	P < 0.0001
Residual	3.031	88	0.03444
Number of missing values	0

## Sheet: Tukey's mult. comp. test
Within each row (Interstimulus Interval), compare tretaments (simple effects within Interstimulus Interval)
Number of families	5
Number of comparisons per family	3
Alpha	0.05
Tukey's multiple comparisons test	Mean Diff.	95% CI of diff.	Significant?	Summary
Interstimuls interval 500 ms
ACSF (6/6) vs. ACSF+JCasp (9/6)	0.01578	-0.2908 to 0.3223	No	ns
ACSF (6/6) vs. ACSF+Pen1-JCasp (10/6)	-0.1361	-0.4365 to 0.1642	No	ns
ACSF+JCasp (9/6) vs. ACSF+Pen1-JCasp (10/6)	-0.1519	-0.4191 to 0.1153	No	ns
Interstimuls interval 200 ms
ACSF (6/6) vs. ACSF+JCasp (9/6)	-0.09883	-0.4054 to 0.2077	No	ns
ACSF (6/6) vs. ACSF+Pen1-JCasp (10/6)	-0.4201	-0.7205 to -0.1198	Yes	**
ACSF+JCasp (9/6) vs. ACSF+Pen1-JCasp (10/6)	-0.3213	-0.5885 to -0.05407	Yes	*
Interstimuls interval 80 ms
ACSF (6/6) vs. ACSF+JCasp (9/6)	-0.1353	-0.4418 to 0.1713	No	ns
ACSF (6/6) vs. ACSF+Pen1-JCasp (10/6)	-0.6056	-0.9060 to -0.3053	Yes	****
ACSF+JCasp (9/6) vs. ACSF+Pen1-JCasp (10/6)	-0.4704	-0.7376 to -0.2031	Yes	***
Interstimuls interval 40 ms
ACSF (6/6) vs. ACSF+JCasp (9/6)	-0.1071	-0.4136 to 0.1995	No	ns
ACSF (6/6) vs. ACSF+Pen1-JCasp (10/6)	-0.5205	-0.8209 to -0.2202	Yes	***
ACSF+JCasp (9/6) vs. ACSF+Pen1-JCasp (10/6)	-0.4135	-0.6807 to -0.1462	Yes	**
Interstimuls interval 20 ms
ACSF (6/6) vs. ACSF+JCasp (9/6)	-0.01678	-0.3233 to 0.2898	No	ns
ACSF (6/6) vs. ACSF+Pen1-JCasp (10/6)	-0.6313	-0.9316 to -0.3309	Yes	****
ACSF+JCasp (9/6) vs. ACSF+Pen1-JCasp (10/6)	-0.6145	-0.8817 to -0.3473	Yes	****
Test details	Mean 1	Mean 2	Mean Diff.	SE of diff.	N1	N2	q	DF
Interstimuls interval 500 ms
ACSF (6/6) vs. ACSF+JCasp (9/6)	1.204	1.188	0.01578	0.129	6	9	0.1729	110
ACSF (6/6) vs. ACSF+Pen1-JCasp (10/6)	1.204	1.34	-0.1361	0.1264	6	10	1.523	110
ACSF+JCasp (9/6) vs. ACSF+Pen1-JCasp (10/6)	1.188	1.34	-0.1519	0.1125	9	10	1.91	110
Interstimuls interval 200 ms
ACSF (6/6) vs. ACSF+JCasp (9/6)	1.53	1.629	-0.09883	0.129	6	9	1.083	110
ACSF (6/6) vs. ACSF+Pen1-JCasp (10/6)	1.53	1.95	-0.4201	0.1264	6	10	4.7	110
ACSF+JCasp (9/6) vs. ACSF+Pen1-JCasp (10/6)	1.629	1.95	-0.3213	0.1125	9	10	4.04	110
Interstimuls interval 80 ms
ACSF (6/6) vs. ACSF+JCasp (9/6)	1.893	2.028	-0.1353	0.129	6	9	1.483	110
ACSF (6/6) vs. ACSF+Pen1-JCasp (10/6)	1.893	2.499	-0.6056	0.1264	6	10	6.775	110
ACSF+JCasp (9/6) vs. ACSF+Pen1-JCasp (10/6)	2.028	2.499	-0.4704	0.1125	9	10	5.914	110
Interstimuls interval 40 ms
ACSF (6/6) vs. ACSF+JCasp (9/6)	2.034	2.141	-0.1071	0.129	6	9	1.173	110
ACSF (6/6) vs. ACSF+Pen1-JCasp (10/6)	2.034	2.555	-0.5205	0.1264	6	10	5.823	110
ACSF+JCasp (9/6) vs. ACSF+Pen1-JCasp (10/6)	2.141	2.555	-0.4135	0.1125	9	10	5.199	110
Interstimuls interval 20 ms
ACSF (6/6) vs. ACSF+JCasp (9/6)	2.226	2.243	-0.01678	0.129	6	9	0.1839	110
ACSF (6/6) vs. ACSF+Pen1-JCasp (10/6)	2.226	2.858	-0.6313	0.1264	6	10	7.062	110
ACSF+JCasp (9/6) vs. ACSF+Pen1-JCasp (10/6)	2.243	2.858	-0.6145	0.1125	9	10	7.726	110

## Sheet: main Treatment effect
Compare TREATMENT means (main TREATMENT effect)
Number of families	1
Number of comparisons per family	3
Alpha	0.05
Tukey's multiple comparisons test	Mean Diff.	95% CI of diff.	Significant?	Summary
ACSF (6/6) vs. ACSF+JCasp (9/6)	-0.06843	-0.3067 to 0.1698	No	ns
ACSF (6/6) vs. ACSF+Pen1-JCasp (10/6)	-0.4627	-0.6962 to -0.2293	Yes	***
ACSF+JCasp (9/6) vs. ACSF+Pen1-JCasp (10/6)	-0.3943	-0.6020 to -0.1866	Yes	***
Test details	Mean 1	Mean 2	Mean Diff.	SE of diff.	N1	N2	q	DF
ACSF (6/6) vs. ACSF+JCasp (9/6)	1.778	1.846	-0.06843	0.09483	30	45	1.021	22
ACSF (6/6) vs. ACSF+Pen1-JCasp (10/6)	1.778	2.24	-0.4627	0.09292	30	50	7.043	22
ACSF+JCasp (9/6) vs. ACSF+Pen1-JCasp (10/6)	1.846	2.24	-0.3943	0.08267	45	50	6.745	22
