# Supplementary material for: APP and APLP2 interact with the synaptic release machinery and facilitate transmitter release at hippocampal synapses
Source: eLife. 2015 Nov 9;4:e09743. doi: 10.7554/eLife.09743 (PMC4755753; doi:10.7554/eLife.09743)
Supplement: Figure 7—source data 3. — DOI: http://dx.doi.org/10.7554/eLife.09743.022 [file elife-09743-fig7-data3.xlsx]

## Sheet: 2way ANOVA of stimulus train
Table Analyzed	Train 10
Two-way RM ANOVA	Matching: Stacked
Alpha	0.05
Source of Variation	% of total variation	P value	P value summary	Significant?
Interaction	4.048	< 0.0001	****	Yes
stimulus number	29.86	< 0.0001	****	Yes
Treatment	25.15	0.0012	**	Yes
Subjects (matching)	29.89	< 0.0001	****	Yes
ANOVA table	SS	DF	MS	F (DFn, DFd)	P value
Interaction	54706	18	3039	F (18, 198) = 6.445	P < 0.0001
stimulus number	403550	9	44839	F (9, 198) = 95.09	P < 0.0001
Treatment	339814	2	169907	F (2, 22) = 9.254	P = 0.0012
Subjects (matching)	403947	22	18361	F (22, 198) = 38.94	P < 0.0001
Residual	93365	198	471.5
Number of missing values	0

## Sheet: Tukey's mult. comp. test
Within each row Stimulus Numberl), compare tretaments (simple effects withinStimulus number)
Number of families	10
Number of comparisons per family	3
Alpha	0.05
Tukey's multiple comparisons test	Mean Diff.	95% CI of diff.	Significant?	Summary
fEPSP1/fEPSP1 X 100
ACSF (6/6) vs. ACSF+JCasp (9/6)	0	-59.13 to 59.13	No	ns
ACSF (6/6) vs. ACSF+Pen1-JCasp (10/6)	0	-57.94 to 57.94	No	ns
ACSF+JCasp (9/6) vs. ACSF+Pen1-JCasp (10/6)	0	-51.55 to 51.55	No	ns
fEPSP2/fEPSP1 X 100
ACSF (6/6) vs. ACSF+JCasp (9/6)	4.527	-54.60 to 63.66	No	ns
ACSF (6/6) vs. ACSF+Pen1-JCasp (10/6)	-37.28	-95.21 to 20.66	No	ns
ACSF+JCasp (9/6) vs. ACSF+Pen1-JCasp (10/6)	-41.8	-93.35 to 9.745	No	ns
fEPSP3/fEPSP1 X 100
ACSF (6/6) vs. ACSF+JCasp (9/6)	-7.21	-66.34 to 51.92	No	ns
ACSF (6/6) vs. ACSF+Pen1-JCasp (10/6)	-78.47	-136.4 to -20.53	Yes	**
ACSF+JCasp (9/6) vs. ACSF+Pen1-JCasp (10/6)	-71.26	-122.8 to -19.71	Yes	**
fEPSP4/fEPSP1 X 100
ACSF (6/6) vs. ACSF+JCasp (9/6)	-12.41	-71.54 to 46.72	No	ns
ACSF (6/6) vs. ACSF+Pen1-JCasp (10/6)	-87.65	-145.6 to -29.72	Yes	**
ACSF+JCasp (9/6) vs. ACSF+Pen1-JCasp (10/6)	-75.24	-126.8 to -23.69	Yes	**
fEPSP5/fEPSP1 X 100
ACSF (6/6) vs. ACSF+JCasp (9/6)	-10.68	-69.81 to 48.45	No	ns
ACSF (6/6) vs. ACSF+Pen1-JCasp (10/6)	-91.47	-149.4 to -33.53	Yes	***
ACSF+JCasp (9/6) vs. ACSF+Pen1-JCasp (10/6)	-80.79	-132.3 to -29.24	Yes	***
fEPSP6/fEPSP1 X 100
ACSF (6/6) vs. ACSF+JCasp (9/6)	-9.279	-68.41 to 49.85	No	ns
ACSF (6/6) vs. ACSF+Pen1-JCasp (10/6)	-104.1	-162.0 to -46.16	Yes	****
ACSF+JCasp (9/6) vs. ACSF+Pen1-JCasp (10/6)	-94.82	-146.4 to -43.27	Yes	****
fEPSP7/fEPSP1 X 100
ACSF (6/6) vs. ACSF+JCasp (9/6)	-6.038	-65.17 to 53.09	No	ns
ACSF (6/6) vs. ACSF+Pen1-JCasp (10/6)	-89.07	-147.0 to -31.13	Yes	**
ACSF+JCasp (9/6) vs. ACSF+Pen1-JCasp (10/6)	-83.03	-134.6 to -31.48	Yes	***
fEPSP8/fEPSP1 X 100
ACSF (6/6) vs. ACSF+JCasp (9/6)	-4.352	-63.48 to 54.78	No	ns
ACSF (6/6) vs. ACSF+Pen1-JCasp (10/6)	-96.77	-154.7 to -38.84	Yes	***
ACSF+JCasp (9/6) vs. ACSF+Pen1-JCasp (10/6)	-92.42	-144.0 to -40.87	Yes	***
fEPSP9/fEPSP1 X 100
ACSF (6/6) vs. ACSF+JCasp (9/6)	-4.105	-63.23 to 55.02	No	ns
ACSF (6/6) vs. ACSF+Pen1-JCasp (10/6)	-97.07	-155.0 to -39.13	Yes	***
ACSF+JCasp (9/6) vs. ACSF+Pen1-JCasp (10/6)	-92.96	-144.5 to -41.42	Yes	****
fEPSP10/fEPSP1 X 100
ACSF (6/6) vs. ACSF+JCasp (9/6)	-4.809	-63.94 to 54.32	No	ns
ACSF (6/6) vs. ACSF+Pen1-JCasp (10/6)	-102.1	-160.1 to -44.20	Yes	***
ACSF+JCasp (9/6) vs. ACSF+Pen1-JCasp (10/6)	-97.32	-148.9 to -45.77	Yes	****
Test details	Mean 1	Mean 2	Mean Diff.	SE of diff.	N1	N2	q	DF
fEPSP1/fEPSP1 X 100
ACSF (6/6) vs. ACSF+JCasp (9/6)	100	100	0	25.06	6	9	0	220
ACSF (6/6) vs. ACSF+Pen1-JCasp (10/6)	100	100	0	24.55	6	10	0	220
ACSF+JCasp (9/6) vs. ACSF+Pen1-JCasp (10/6)	100	100	0	21.85	9	10	0	220
fEPSP2/fEPSP1 X 100
ACSF (6/6) vs. ACSF+JCasp (9/6)	216	211.5	4.527	25.06	6	9	0.2555	220
ACSF (6/6) vs. ACSF+Pen1-JCasp (10/6)	216	253.3	-37.28	24.55	6	10	2.147	220
ACSF+JCasp (9/6) vs. ACSF+Pen1-JCasp (10/6)	211.5	253.3	-41.8	21.85	9	10	2.706	220
fEPSP3/fEPSP1 X 100
ACSF (6/6) vs. ACSF+JCasp (9/6)	225.9	233.1	-7.21	25.06	6	9	0.4069	220
ACSF (6/6) vs. ACSF+Pen1-JCasp (10/6)	225.9	304.4	-78.47	24.55	6	10	4.52	220
ACSF+JCasp (9/6) vs. ACSF+Pen1-JCasp (10/6)	233.1	304.4	-71.26	21.85	9	10	4.613	220
fEPSP4/fEPSP1 X 100
ACSF (6/6) vs. ACSF+JCasp (9/6)	213.4	225.8	-12.41	25.06	6	9	0.7006	220
ACSF (6/6) vs. ACSF+Pen1-JCasp (10/6)	213.4	301	-87.65	24.55	6	10	5.049	220
ACSF+JCasp (9/6) vs. ACSF+Pen1-JCasp (10/6)	225.8	301	-75.24	21.85	9	10	4.871	220
fEPSP5/fEPSP1 X 100
ACSF (6/6) vs. ACSF+JCasp (9/6)	205.4	216	-10.68	25.06	6	9	0.6027	220
ACSF (6/6) vs. ACSF+Pen1-JCasp (10/6)	205.4	296.8	-91.47	24.55	6	10	5.269	220
ACSF+JCasp (9/6) vs. ACSF+Pen1-JCasp (10/6)	216	296.8	-80.79	21.85	9	10	5.23	220
fEPSP6/fEPSP1 X 100
ACSF (6/6) vs. ACSF+JCasp (9/6)	196	205.2	-9.279	25.06	6	9	0.5237	220
ACSF (6/6) vs. ACSF+Pen1-JCasp (10/6)	196	300.1	-104.1	24.55	6	10	5.996	220
ACSF+JCasp (9/6) vs. ACSF+Pen1-JCasp (10/6)	205.2	300.1	-94.82	21.85	9	10	6.138	220
fEPSP7/fEPSP1 X 100
ACSF (6/6) vs. ACSF+JCasp (9/6)	194	200	-6.038	25.06	6	9	0.3408	220
ACSF (6/6) vs. ACSF+Pen1-JCasp (10/6)	194	283	-89.07	24.55	6	10	5.13	220
ACSF+JCasp (9/6) vs. ACSF+Pen1-JCasp (10/6)	200	283	-83.03	21.85	9	10	5.375	220
fEPSP8/fEPSP1 X 100
ACSF (6/6) vs. ACSF+JCasp (9/6)	188.3	192.7	-4.352	25.06	6	9	0.2456	220
ACSF (6/6) vs. ACSF+Pen1-JCasp (10/6)	188.3	285.1	-96.77	24.55	6	10	5.574	220
ACSF+JCasp (9/6) vs. ACSF+Pen1-JCasp (10/6)	192.7	285.1	-92.42	21.85	9	10	5.983	220
fEPSP9/fEPSP1 X 100
ACSF (6/6) vs. ACSF+JCasp (9/6)	185.1	189.2	-4.105	25.06	6	9	0.2317	220
ACSF (6/6) vs. ACSF+Pen1-JCasp (10/6)	185.1	282.2	-97.07	24.55	6	10	5.591	220
ACSF+JCasp (9/6) vs. ACSF+Pen1-JCasp (10/6)	189.2	282.2	-92.96	21.85	9	10	6.018	220
fEPSP10/fEPSP1 X 100
ACSF (6/6) vs. ACSF+JCasp (9/6)	183.9	188.7	-4.809	25.06	6	9	0.2714	220
ACSF (6/6) vs. ACSF+Pen1-JCasp (10/6)	183.9	286.1	-102.1	24.55	6	10	5.883	220
ACSF+JCasp (9/6) vs. ACSF+Pen1-JCasp (10/6)	188.7	286.1	-97.32	21.85	9	10	6.3	220

## Sheet: main Treatment effect
Compare TREATMENT means (main TREATMENT effect)
Number of families	1
Number of comparisons per family	3
Alpha	0.05
Tukey's multiple comparisons test	Mean Diff.	95% CI of diff.	Significant?	Summary
ACSF (6/6) vs. ACSF+JCasp (9/6)	-5.436	-62.17 to 51.30	No	ns
ACSF (6/6) vs. ACSF+Pen1-JCasp (10/6)	-78.4	-134.0 to -22.81	Yes	**
ACSF+JCasp (9/6) vs. ACSF+Pen1-JCasp (10/6)	-72.96	-122.4 to -23.51	Yes	**
Test details	Mean 1	Mean 2	Mean Diff.	SE of diff.	N1	N2	q	DF
ACSF (6/6) vs. ACSF+JCasp (9/6)	190.8	196.2	-5.436	22.58	60	90	0.3404	22
ACSF (6/6) vs. ACSF+Pen1-JCasp (10/6)	190.8	269.2	-78.4	22.13	60	100	5.011	22
ACSF+JCasp (9/6) vs. ACSF+Pen1-JCasp (10/6)	196.2	269.2	-72.96	19.69	90	100	5.241	22
