# Supplementary material for: APP and APLP2 interact with the synaptic release machinery and facilitate transmitter release at hippocampal synapses
Source: eLife. 2015 Nov 9;4:e09743. doi: 10.7554/eLife.09743 (PMC4755753; doi:10.7554/eLife.09743)
Supplement: Figure 8—source data 1. — DOI: http://dx.doi.org/10.7554/eLife.09743.024 [file elife-09743-fig8-data1.xlsx]

## Sheet: Paired t test
Table Analyzed	frequency
Column B	JCasp + Cd++ (10/6)
vs.	vs.
Column A	SCJCasp + Cd++ (10/6)
Paired t test
P value	0.0312
P value summary	*
Significantly different? (P < 0.05)	Yes
One- or two-tailed P value?	Two-tailed
t, df	t=2.968 df=5
Number of pairs	6
How big is the difference?
Mean of differences	-0.2278
SD of differences	0.188
SEM of differences	0.07676
95% confidence interval	-0.4252 to -0.03054
R squared	0.638
How effective was the pairing?
Correlation coefficient (r)	0.9628
P value (one tailed)	0.001
P value summary	**
Was the pairing significantly effective?	Yes
