# Supplementary material for: APP and APLP2 interact with the synaptic release machinery and facilitate transmitter release at hippocampal synapses
Source: eLife. 2015 Nov 9;4:e09743. doi: 10.7554/eLife.09743 (PMC4755753; doi:10.7554/eLife.09743)
Supplement: Figure 9—source data 1. — DOI: http://dx.doi.org/10.7554/eLife.09743.026 [file elife-09743-fig9-data1.xlsx]

## Sheet: one-way ANOVA of I-O
Table Analyzed	Data I-O slopes
ANOVA summary
F	2.314
P value	0.0923
P value summary	ns
Are differences among means statistically significant? (P < 0.05)	No
R square	0.1617
Brown-Forsythe test
F (DFn, DFd)	0.5593 (3, 36)
P value	0.6453
P value summary	ns
Significantly different standard deviations? (P < 0.05)	No
Bartlett's test
Bartlett's statistic (corrected)	2.282
P value	0.516
P value summary	ns
Significantly different standard deviations? (P < 0.05)	No
ANOVA table	SS	DF	MS	F (DFn, DFd)	P value
Treatment (between columns)	88.83	3	29.61	F (3, 36) = 2.314	P = 0.0923
Residual (within columns)	460.6	36	12.8
Total	549.5	39
Data summary
Number of treatments (columns)	4
Number of values (total)	40

## Sheet: Tukey's mult. comp. test
Within each row, compare columns (simple effects within rows)
Number of families	1
Number of comparisons per family	6
Alpha	0.05
Tukey's multiple comparisons test	Mean Diff.	95% CI of diff.	Significant?	Summary
WT-Pen1-ScJCasp (10/5) vs. WT-Pen1-JCasp (10/5)	3.898	-0.4102 to 8.206	No	ns		A-B
WT-Pen1-ScJCasp (10/5) vs. App-KO-Pen1-ScJCasp (10/6)	2.977	-1.331 to 7.285	No	ns		A-C
WT-Pen1-ScJCasp (10/5) vs. App-KO-Pen1-JCasp (10/6)	1.411	-2.897 to 5.720	No	ns		A-D
WT-Pen1-JCasp (10/5) vs. App-KO-Pen1-ScJCasp (10/6)	-0.9211	-5.229 to 3.387	No	ns		B-C
WT-Pen1-JCasp (10/5) vs. App-KO-Pen1-JCasp (10/6)	-2.487	-6.795 to 1.822	No	ns		B-D
App-KO-Pen1-ScJCasp (10/6) vs. App-KO-Pen1-JCasp (10/6)	-1.566	-5.874 to 2.743	No	ns		C-D
Test details	Mean 1	Mean 2	Mean Diff.	SE of diff.	n1	n2	q	DF
WT-Pen1-ScJCasp (10/5) vs. WT-Pen1-JCasp (10/5)	10.73	6.827	3.898	1.6	10	10	3.446	36
WT-Pen1-ScJCasp (10/5) vs. App-KO-Pen1-ScJCasp (10/6)	10.73	7.748	2.977	1.6	10	10	2.632	36
WT-Pen1-ScJCasp (10/5) vs. App-KO-Pen1-JCasp (10/6)	10.73	9.314	1.411	1.6	10	10	1.248	36
WT-Pen1-JCasp (10/5) vs. App-KO-Pen1-ScJCasp (10/6)	6.827	7.748	-0.9211	1.6	10	10	0.8143	36
WT-Pen1-JCasp (10/5) vs. App-KO-Pen1-JCasp (10/6)	6.827	9.314	-2.487	1.6	10	10	2.198	36
App-KO-Pen1-ScJCasp (10/6) vs. App-KO-Pen1-JCasp (10/6)	7.748	9.314	-1.566	1.6	10	10	1.384	36

## Sheet: Uncorrected Fisher's LSD
Number of families	1
Number of comparisons per family	6
Alpha	0.05
Uncorrected Fisher's LSD	Mean Diff.	95% CI of diff.	Significant?	Summary	Individual P Value
WT-Pen1-ScJCasp (10/5) vs. WT-Pen1-JCasp (10/5)	3.898	0.6538 to 7.142	Yes	*	0.0199	A-B
WT-Pen1-ScJCasp (10/5) vs. App-KO-Pen1-ScJCasp (10/6)	2.977	-0.2674 to 6.221	No	ns	0.0709	A-C
WT-Pen1-ScJCasp (10/5) vs. App-KO-Pen1-JCasp (10/6)	1.411	-1.833 to 4.656	No	ns	0.3835	A-D
WT-Pen1-JCasp (10/5) vs. App-KO-Pen1-ScJCasp (10/6)	-0.9211	-4.165 to 2.323	No	ns	0.5683	B-C
WT-Pen1-JCasp (10/5) vs. App-KO-Pen1-JCasp (10/6)	-2.487	-5.731 to 0.7575	No	ns	0.1288	B-D
App-KO-Pen1-ScJCasp (10/6) vs. App-KO-Pen1-JCasp (10/6)	-1.566	-4.810 to 1.679	No	ns	0.3342	C-D
Test details	Mean 1	Mean 2	Mean Diff.	SE of diff.	n1	n2	t	DF
WT-Pen1-ScJCasp (10/5) vs. WT-Pen1-JCasp (10/5)	10.73	6.827	3.898	1.6	10	10	2.437	36
WT-Pen1-ScJCasp (10/5) vs. App-KO-Pen1-ScJCasp (10/6)	10.73	7.748	2.977	1.6	10	10	1.861	36
WT-Pen1-ScJCasp (10/5) vs. App-KO-Pen1-JCasp (10/6)	10.73	9.314	1.411	1.6	10	10	0.8822	36
WT-Pen1-JCasp (10/5) vs. App-KO-Pen1-ScJCasp (10/6)	6.827	7.748	-0.9211	1.6	10	10	0.5758	36
WT-Pen1-JCasp (10/5) vs. App-KO-Pen1-JCasp (10/6)	6.827	9.314	-2.487	1.6	10	10	1.555	36
App-KO-Pen1-ScJCasp (10/6) vs. App-KO-Pen1-JCasp (10/6)	7.748	9.314	-1.566	1.6	10	10	0.9787	36
