# Supplementary material for: APP and APLP2 interact with the synaptic release machinery and facilitate transmitter release at hippocampal synapses
Source: eLife. 2015 Nov 9;4:e09743. doi: 10.7554/eLife.09743 (PMC4755753; doi:10.7554/eLife.09743)
Supplement: Figure 9—source data 2. — DOI: http://dx.doi.org/10.7554/eLife.09743.027 [file elife-09743-fig9-data2.xlsx]

## Sheet: 2way ANOVA of PPR
Table Analyzed	PPR
Two-way RM ANOVA	Matching: Stacked
Alpha	0.05
Source of Variation	% of total variation	P value	P value summary	Significant?
Interaction	4.618	< 0.0001	****	Yes
Interstimulus interval	70.18	< 0.0001	****	Yes
Genotype-treatment	11.19	< 0.0001	****	Yes
Subjects (matching)	8.692	< 0.0001	****	Yes
ANOVA table	SS	DF	MS	F (DFn, DFd)	P value
Interaction	1.344	12	0.112	F (12, 144) = 10.42	P < 0.0001
Interstimulus interval	20.43	4	5.106	F (4, 144) = 475.0	P < 0.0001
Genotype-treatment	3.257	3	1.086	F (3, 36) = 15.45	P < 0.0001
Subjects (matching)	2.53	36	0.07027	F (36, 144) = 6.537	P < 0.0001
Residual	1.548	144	0.01075
Number of missing values	0

## Sheet: Tukey's mult. comp. test
Within each row (Interstimulus Interval), compare tretaments (simple effects within Interstimulus Interval)
Number of families	5
Number of comparisons per family	6
Alpha	0.05
Tukey's multiple comparisons test	Mean Diff.	95% CI of diff.	Significant?	Summary
Interstimuls interval 500 ms
WT-Pen1-ScJCasp (10/5) vs. WT-Pen1-JCasp (10/5)	-0.03167	-0.2062 to 0.1429	No	ns
WT-Pen1-ScJCasp (10/5) vs. App-KO-Pen1-ScJCasp (10/6)	-0.03497	-0.2095 to 0.1396	No	ns
WT-Pen1-ScJCasp (10/5) vs. App-KO-Pen1-JCasp (10/6)	0.000931	-0.1736 to 0.1755	No	ns
WT-Pen1-JCasp (10/5) vs. App-KO-Pen1-ScJCasp (10/6)	-0.0033	-0.1778 to 0.1712	No	ns
WT-Pen1-JCasp (10/5) vs. App-KO-Pen1-JCasp (10/6)	0.0326	-0.1419 to 0.2071	No	ns
App-KO-Pen1-ScJCasp (10/6) vs. App-KO-Pen1-JCasp (10/6)	0.0359	-0.1386 to 0.2104	No	ns
Interstimuls interval 200 ms
WT-Pen1-ScJCasp (10/5) vs. WT-Pen1-JCasp (10/5)	-0.2052	-0.3797 to -0.03065	Yes	*
WT-Pen1-ScJCasp (10/5) vs. App-KO-Pen1-ScJCasp (10/6)	-0.0184	-0.1929 to 0.1561	No	ns
WT-Pen1-ScJCasp (10/5) vs. App-KO-Pen1-JCasp (10/6)	-0.0265	-0.2010 to 0.1480	No	ns
WT-Pen1-JCasp (10/5) vs. App-KO-Pen1-ScJCasp (10/6)	0.1868	0.01225 to 0.3613	Yes	*
WT-Pen1-JCasp (10/5) vs. App-KO-Pen1-JCasp (10/6)	0.1787	0.004150 to 0.3532	Yes	*
App-KO-Pen1-ScJCasp (10/6) vs. App-KO-Pen1-JCasp (10/6)	-0.0081	-0.1826 to 0.1664	No	ns
Interstimuls interval 80 ms
WT-Pen1-ScJCasp (10/5) vs. WT-Pen1-JCasp (10/5)	-0.3022	-0.4767 to -0.1277	Yes	****
WT-Pen1-ScJCasp (10/5) vs. App-KO-Pen1-ScJCasp (10/6)	-0.023	-0.1975 to 0.1515	No	ns
WT-Pen1-ScJCasp (10/5) vs. App-KO-Pen1-JCasp (10/6)	-0.0295	-0.2040 to 0.1450	No	ns
WT-Pen1-JCasp (10/5) vs. App-KO-Pen1-ScJCasp (10/6)	0.2792	0.1047 to 0.4537	Yes	***
WT-Pen1-JCasp (10/5) vs. App-KO-Pen1-JCasp (10/6)	0.2727	0.09815 to 0.4472	Yes	***
App-KO-Pen1-ScJCasp (10/6) vs. App-KO-Pen1-JCasp (10/6)	-0.0065	-0.1810 to 0.1680	No	ns
Interstimuls interval 40 ms
WT-Pen1-ScJCasp (10/5) vs. WT-Pen1-JCasp (10/5)	-0.426	-0.6005 to -0.2515	Yes	****
WT-Pen1-ScJCasp (10/5) vs. App-KO-Pen1-ScJCasp (10/6)	0.0458	-0.1287 to 0.2203	No	ns
WT-Pen1-ScJCasp (10/5) vs. App-KO-Pen1-JCasp (10/6)	-0.0187	-0.1932 to 0.1558	No	ns
WT-Pen1-JCasp (10/5) vs. App-KO-Pen1-ScJCasp (10/6)	0.4718	0.2973 to 0.6463	Yes	****
WT-Pen1-JCasp (10/5) vs. App-KO-Pen1-JCasp (10/6)	0.4073	0.2328 to 0.5818	Yes	****
App-KO-Pen1-ScJCasp (10/6) vs. App-KO-Pen1-JCasp (10/6)	-0.0645	-0.2390 to 0.1100	No	ns
Interstimuls interval 20 ms
WT-Pen1-ScJCasp (10/5) vs. WT-Pen1-JCasp (10/5)	-0.4936	-0.6681 to -0.3191	Yes	****
WT-Pen1-ScJCasp (10/5) vs. App-KO-Pen1-ScJCasp (10/6)	0.0509	-0.1236 to 0.2254	No	ns
WT-Pen1-ScJCasp (10/5) vs. App-KO-Pen1-JCasp (10/6)	0.0978	-0.07675 to 0.2723	No	ns
WT-Pen1-JCasp (10/5) vs. App-KO-Pen1-ScJCasp (10/6)	0.5445	0.3700 to 0.7190	Yes	****
WT-Pen1-JCasp (10/5) vs. App-KO-Pen1-JCasp (10/6)	0.5914	0.4169 to 0.7659	Yes	****
App-KO-Pen1-ScJCasp (10/6) vs. App-KO-Pen1-JCasp (10/6)	0.0469	-0.1276 to 0.2214	No	ns
Test details	Mean 1	Mean 2	Mean Diff.	SE of diff.	N1	N2	q	DF
Interstimuls interval 500 ms
WT-Pen1-ScJCasp (10/5) vs. WT-Pen1-JCasp (10/5)	1.22	1.251	-0.03167	0.06731	10	10	0.6654	180
WT-Pen1-ScJCasp (10/5) vs. App-KO-Pen1-ScJCasp (10/6)	1.22	1.255	-0.03497	0.06731	10	10	0.7347	180
WT-Pen1-ScJCasp (10/5) vs. App-KO-Pen1-JCasp (10/6)	1.22	1.219	0.000931	0.06731	10	10	0.01956	180
WT-Pen1-JCasp (10/5) vs. App-KO-Pen1-ScJCasp (10/6)	1.251	1.255	-0.0033	0.06731	10	10	0.06933	180
WT-Pen1-JCasp (10/5) vs. App-KO-Pen1-JCasp (10/6)	1.251	1.219	0.0326	0.06731	10	10	0.6849	180
App-KO-Pen1-ScJCasp (10/6) vs. App-KO-Pen1-JCasp (10/6)	1.255	1.219	0.0359	0.06731	10	10	0.7543	180
Interstimuls interval 200 ms
WT-Pen1-ScJCasp (10/5) vs. WT-Pen1-JCasp (10/5)	1.579	1.784	-0.2052	0.06731	10	10	4.311	180
WT-Pen1-ScJCasp (10/5) vs. App-KO-Pen1-ScJCasp (10/6)	1.579	1.598	-0.0184	0.06731	10	10	0.3866	180
WT-Pen1-ScJCasp (10/5) vs. App-KO-Pen1-JCasp (10/6)	1.579	1.606	-0.0265	0.06731	10	10	0.5568	180
WT-Pen1-JCasp (10/5) vs. App-KO-Pen1-ScJCasp (10/6)	1.784	1.598	0.1868	0.06731	10	10	3.925	180
WT-Pen1-JCasp (10/5) vs. App-KO-Pen1-JCasp (10/6)	1.784	1.606	0.1787	0.06731	10	10	3.755	180
App-KO-Pen1-ScJCasp (10/6) vs. App-KO-Pen1-JCasp (10/6)	1.598	1.606	-0.0081	0.06731	10	10	0.1702	180
Interstimuls interval 80 ms
WT-Pen1-ScJCasp (10/5) vs. WT-Pen1-JCasp (10/5)	1.872	2.174	-0.3022	0.06731	10	10	6.349	180
WT-Pen1-ScJCasp (10/5) vs. App-KO-Pen1-ScJCasp (10/6)	1.872	1.895	-0.023	0.06731	10	10	0.4832	180
WT-Pen1-ScJCasp (10/5) vs. App-KO-Pen1-JCasp (10/6)	1.872	1.901	-0.0295	0.06731	10	10	0.6198	180
WT-Pen1-JCasp (10/5) vs. App-KO-Pen1-ScJCasp (10/6)	2.174	1.895	0.2792	0.06731	10	10	5.866	180
WT-Pen1-JCasp (10/5) vs. App-KO-Pen1-JCasp (10/6)	2.174	1.901	0.2727	0.06731	10	10	5.729	180
App-KO-Pen1-ScJCasp (10/6) vs. App-KO-Pen1-JCasp (10/6)	1.895	1.901	-0.0065	0.06731	10	10	0.1366	180
Interstimuls interval 40 ms
WT-Pen1-ScJCasp (10/5) vs. WT-Pen1-JCasp (10/5)	1.985	2.411	-0.426	0.06731	10	10	8.95	180
WT-Pen1-ScJCasp (10/5) vs. App-KO-Pen1-ScJCasp (10/6)	1.985	1.939	0.0458	0.06731	10	10	0.9623	180
WT-Pen1-ScJCasp (10/5) vs. App-KO-Pen1-JCasp (10/6)	1.985	2.003	-0.0187	0.06731	10	10	0.3929	180
WT-Pen1-JCasp (10/5) vs. App-KO-Pen1-ScJCasp (10/6)	2.411	1.939	0.4718	0.06731	10	10	9.913	180
WT-Pen1-JCasp (10/5) vs. App-KO-Pen1-JCasp (10/6)	2.411	2.003	0.4073	0.06731	10	10	8.557	180
App-KO-Pen1-ScJCasp (10/6) vs. App-KO-Pen1-JCasp (10/6)	1.939	2.003	-0.0645	0.06731	10	10	1.355	180
Interstimuls interval 20 ms
WT-Pen1-ScJCasp (10/5) vs. WT-Pen1-JCasp (10/5)	1.961	2.455	-0.4936	0.06731	10	10	10.37	180
WT-Pen1-ScJCasp (10/5) vs. App-KO-Pen1-ScJCasp (10/6)	1.961	1.91	0.0509	0.06731	10	10	1.069	180
WT-Pen1-ScJCasp (10/5) vs. App-KO-Pen1-JCasp (10/6)	1.961	1.863	0.0978	0.06731	10	10	2.055	180
WT-Pen1-JCasp (10/5) vs. App-KO-Pen1-ScJCasp (10/6)	2.455	1.91	0.5445	0.06731	10	10	11.44	180
WT-Pen1-JCasp (10/5) vs. App-KO-Pen1-JCasp (10/6)	2.455	1.863	0.5914	0.06731	10	10	12.43	180
App-KO-Pen1-ScJCasp (10/6) vs. App-KO-Pen1-JCasp (10/6)	1.91	1.863	0.0469	0.06731	10	10	0.9854	180

## Sheet: main Treatment effect
Compare GENOTYPE/TREATMENT means (main GENOTYPE/TREATMENT effect)
Number of families	1
Number of comparisons per family	6
Alpha	0.05
Tukey's multiple comparisons test	Mean Diff.	95% CI of diff.	Significant?	Summary
WT-Pen1-ScJCasp (10/5) vs. WT-Pen1-JCasp (10/5)	-0.2917	-0.4345 to -0.1489	Yes	****
WT-Pen1-ScJCasp (10/5) vs. App-KO-Pen1-ScJCasp (10/6)	0.004066	-0.1387 to 0.1469	No	ns
WT-Pen1-ScJCasp (10/5) vs. App-KO-Pen1-JCasp (10/6)	0.004806	-0.1380 to 0.1476	No	ns
WT-Pen1-JCasp (10/5) vs. App-KO-Pen1-ScJCasp (10/6)	0.2958	0.1530 to 0.4386	Yes	****
WT-Pen1-JCasp (10/5) vs. App-KO-Pen1-JCasp (10/6)	0.2965	0.1538 to 0.4393	Yes	****
App-KO-Pen1-ScJCasp (10/6) vs. App-KO-Pen1-JCasp (10/6)	0.00074	-0.1420 to 0.1435	No	ns
Test details	Mean 1	Mean 2	Mean Diff.	SE of diff.	N1	N2	q	DF
WT-Pen1-ScJCasp (10/5) vs. WT-Pen1-JCasp (10/5)	1.723	2.015	-0.2917	0.05302	50	50	7.782	36
WT-Pen1-ScJCasp (10/5) vs. App-KO-Pen1-ScJCasp (10/6)	1.723	1.719	0.004066	0.05302	50	50	0.1085	36
WT-Pen1-ScJCasp (10/5) vs. App-KO-Pen1-JCasp (10/6)	1.723	1.718	0.004806	0.05302	50	50	0.1282	36
WT-Pen1-JCasp (10/5) vs. App-KO-Pen1-ScJCasp (10/6)	2.015	1.719	0.2958	0.05302	50	50	7.89	36
WT-Pen1-JCasp (10/5) vs. App-KO-Pen1-JCasp (10/6)	2.015	1.718	0.2965	0.05302	50	50	7.91	36
App-KO-Pen1-ScJCasp (10/6) vs. App-KO-Pen1-JCasp (10/6)	1.719	1.718	0.00074	0.05302	50	50	0.01974	36
