# Supplementary material for: APP and APLP2 interact with the synaptic release machinery and facilitate transmitter release at hippocampal synapses
Source: eLife. 2015 Nov 9;4:e09743. doi: 10.7554/eLife.09743 (PMC4755753; doi:10.7554/eLife.09743)
Supplement: Figure 9—source data 3. — DOI: http://dx.doi.org/10.7554/eLife.09743.028 [file elife-09743-fig9-data3.xlsx]

## Sheet: 2way ANOVA of 1 hz train
Table Analyzed	Train 10
Two-way RM ANOVA	Matching: Stacked
Alpha	0.05
Source of Variation	% of total variation	P value	P value summary	Significant?
Interaction	2.617	< 0.0001	****	Yes
Stimulus Number	39.65	< 0.0001	****	Yes
Genotype/Treatment	18.5	0.0007	***	Yes
Subjects (matching)	30.99	< 0.0001	****	Yes
ANOVA table	SS	DF	MS	F (DFn, DFd)	P value
Interaction	26181	27	969.7	F (27, 324) = 3.811	P < 0.0001
Stimulus Number	396675	9	44075	F (9, 324) = 173.2	P < 0.0001
Genotype/Treatment	185131	3	61710	F (3, 36) = 7.164	P = 0.0007
Subjects (matching)	310090	36	8614	F (36, 324) = 33.85	P < 0.0001
Residual	82437	324	254.4
Number of missing values	0

## Sheet: Tukey's mult. comp. test
7/4/20157/4/20157/4/2015
Number of families	10
Number of comparisons per family	6
Alpha	0.05
Tukey's multiple comparisons test	Mean Diff.	95% CI of diff.	Significant?	Summary
fEPSP1/fEPSP1 X 100
WT-Pen1-ScJCasp (10/5) vs. WT-Pen1-JCasp (10/5)	0	-38.12 to 38.12	No	ns
WT-Pen1-ScJCasp (10/5) vs. App-KO-Pen1-ScJCasp (10/6)	0	-38.12 to 38.12	No	ns
WT-Pen1-ScJCasp (10/5) vs. App-KO-Pen1-JCasp (10/6)	0	-38.12 to 38.12	No	ns
WT-Pen1-JCasp (10/5) vs. App-KO-Pen1-ScJCasp (10/6)	0	-38.12 to 38.12	No	ns
WT-Pen1-JCasp (10/5) vs. App-KO-Pen1-JCasp (10/6)	0	-38.12 to 38.12	No	ns
App-KO-Pen1-ScJCasp (10/6) vs. App-KO-Pen1-JCasp (10/6)	0	-38.12 to 38.12	No	ns
fEPSP2/fEPSP1 X 100
WT-Pen1-ScJCasp (10/5) vs. WT-Pen1-JCasp (10/5)	-28.35	-66.46 to 9.766	No	ns
WT-Pen1-ScJCasp (10/5) vs. App-KO-Pen1-ScJCasp (10/6)	15.37	-22.74 to 53.49	No	ns
WT-Pen1-ScJCasp (10/5) vs. App-KO-Pen1-JCasp (10/6)	9.773	-28.34 to 47.89	No	ns
WT-Pen1-JCasp (10/5) vs. App-KO-Pen1-ScJCasp (10/6)	43.72	5.607 to 81.84	Yes	*
WT-Pen1-JCasp (10/5) vs. App-KO-Pen1-JCasp (10/6)	38.12	0.007092 to 76.24	Yes	*
App-KO-Pen1-ScJCasp (10/6) vs. App-KO-Pen1-JCasp (10/6)	-5.6	-43.72 to 32.52	No	ns
fEPSP3/fEPSP1 X 100
WT-Pen1-ScJCasp (10/5) vs. WT-Pen1-JCasp (10/5)	-57.17	-95.29 to -19.06	Yes	***
WT-Pen1-ScJCasp (10/5) vs. App-KO-Pen1-ScJCasp (10/6)	14	-24.12 to 52.11	No	ns
WT-Pen1-ScJCasp (10/5) vs. App-KO-Pen1-JCasp (10/6)	4.603	-33.51 to 42.72	No	ns
WT-Pen1-JCasp (10/5) vs. App-KO-Pen1-ScJCasp (10/6)	71.17	33.06 to 109.3	Yes	****
WT-Pen1-JCasp (10/5) vs. App-KO-Pen1-JCasp (10/6)	61.78	23.66 to 99.89	Yes	***
App-KO-Pen1-ScJCasp (10/6) vs. App-KO-Pen1-JCasp (10/6)	-9.396	-47.51 to 28.72	No	ns
fEPSP4/fEPSP1 X 100
WT-Pen1-ScJCasp (10/5) vs. WT-Pen1-JCasp (10/5)	-60.35	-98.46 to -22.23	Yes	***
WT-Pen1-ScJCasp (10/5) vs. App-KO-Pen1-ScJCasp (10/6)	8.222	-29.89 to 46.34	No	ns
WT-Pen1-ScJCasp (10/5) vs. App-KO-Pen1-JCasp (10/6)	-0.8593	-38.97 to 37.26	No	ns
WT-Pen1-JCasp (10/5) vs. App-KO-Pen1-ScJCasp (10/6)	68.57	30.45 to 106.7	Yes	****
WT-Pen1-JCasp (10/5) vs. App-KO-Pen1-JCasp (10/6)	59.49	21.37 to 97.60	Yes	***
App-KO-Pen1-ScJCasp (10/6) vs. App-KO-Pen1-JCasp (10/6)	-9.081	-47.20 to 29.03	No	ns
fEPSP5/fEPSP1 X 100
WT-Pen1-ScJCasp (10/5) vs. WT-Pen1-JCasp (10/5)	-58.22	-96.34 to -20.11	Yes	***
WT-Pen1-ScJCasp (10/5) vs. App-KO-Pen1-ScJCasp (10/6)	6.524	-31.59 to 44.64	No	ns
WT-Pen1-ScJCasp (10/5) vs. App-KO-Pen1-JCasp (10/6)	-3.02	-41.14 to 35.10	No	ns
WT-Pen1-JCasp (10/5) vs. App-KO-Pen1-ScJCasp (10/6)	64.75	26.63 to 102.9	Yes	****
WT-Pen1-JCasp (10/5) vs. App-KO-Pen1-JCasp (10/6)	55.2	17.09 to 93.32	Yes	**
App-KO-Pen1-ScJCasp (10/6) vs. App-KO-Pen1-JCasp (10/6)	-9.543	-47.66 to 28.57	No	ns
fEPSP6/fEPSP1 X 100
WT-Pen1-ScJCasp (10/5) vs. WT-Pen1-JCasp (10/5)	-55.44	-93.56 to -17.33	Yes	**
WT-Pen1-ScJCasp (10/5) vs. App-KO-Pen1-ScJCasp (10/6)	3.794	-34.32 to 41.91	No	ns
WT-Pen1-ScJCasp (10/5) vs. App-KO-Pen1-JCasp (10/6)	-6.519	-44.63 to 31.60	No	ns
WT-Pen1-JCasp (10/5) vs. App-KO-Pen1-ScJCasp (10/6)	59.24	21.12 to 97.35	Yes	***
WT-Pen1-JCasp (10/5) vs. App-KO-Pen1-JCasp (10/6)	48.92	10.81 to 87.04	Yes	**
App-KO-Pen1-ScJCasp (10/6) vs. App-KO-Pen1-JCasp (10/6)	-10.31	-48.43 to 27.80	No	ns
fEPSP7/fEPSP1 X 100
WT-Pen1-ScJCasp (10/5) vs. WT-Pen1-JCasp (10/5)	-59.52	-97.64 to -21.41	Yes	***
WT-Pen1-ScJCasp (10/5) vs. App-KO-Pen1-ScJCasp (10/6)	2.741	-35.37 to 40.86	No	ns
WT-Pen1-ScJCasp (10/5) vs. App-KO-Pen1-JCasp (10/6)	-9.537	-47.65 to 28.58	No	ns
WT-Pen1-JCasp (10/5) vs. App-KO-Pen1-ScJCasp (10/6)	62.27	24.15 to 100.4	Yes	***
WT-Pen1-JCasp (10/5) vs. App-KO-Pen1-JCasp (10/6)	49.99	11.87 to 88.10	Yes	**
App-KO-Pen1-ScJCasp (10/6) vs. App-KO-Pen1-JCasp (10/6)	-12.28	-50.39 to 25.84	No	ns
fEPSP8/fEPSP1 X 100
WT-Pen1-ScJCasp (10/5) vs. WT-Pen1-JCasp (10/5)	-52.81	-90.92 to -14.69	Yes	**
WT-Pen1-ScJCasp (10/5) vs. App-KO-Pen1-ScJCasp (10/6)	2.961	-35.15 to 41.08	No	ns
WT-Pen1-ScJCasp (10/5) vs. App-KO-Pen1-JCasp (10/6)	-7.904	-46.02 to 30.21	No	ns
WT-Pen1-JCasp (10/5) vs. App-KO-Pen1-ScJCasp (10/6)	55.77	17.65 to 93.88	Yes	**
WT-Pen1-JCasp (10/5) vs. App-KO-Pen1-JCasp (10/6)	44.9	6.788 to 83.02	Yes	*
App-KO-Pen1-ScJCasp (10/6) vs. App-KO-Pen1-JCasp (10/6)	-10.86	-48.98 to 27.25	No	ns
fEPSP9/fEPSP1 X 100
WT-Pen1-ScJCasp (10/5) vs. WT-Pen1-JCasp (10/5)	-54.68	-92.80 to -16.56	Yes	**
WT-Pen1-ScJCasp (10/5) vs. App-KO-Pen1-ScJCasp (10/6)	5.463	-32.65 to 43.58	No	ns
WT-Pen1-ScJCasp (10/5) vs. App-KO-Pen1-JCasp (10/6)	-5.443	-43.56 to 32.67	No	ns
WT-Pen1-JCasp (10/5) vs. App-KO-Pen1-ScJCasp (10/6)	60.14	22.03 to 98.26	Yes	***
WT-Pen1-JCasp (10/5) vs. App-KO-Pen1-JCasp (10/6)	49.24	11.12 to 87.35	Yes	**
App-KO-Pen1-ScJCasp (10/6) vs. App-KO-Pen1-JCasp (10/6)	-10.91	-49.02 to 27.21	No	ns
fEPSP10/fEPSP1 X 100
WT-Pen1-ScJCasp (10/5) vs. WT-Pen1-JCasp (10/5)	-50.26	-88.37 to -12.14	Yes	**
WT-Pen1-ScJCasp (10/5) vs. App-KO-Pen1-ScJCasp (10/6)	7.347	-30.77 to 45.46	No	ns
WT-Pen1-ScJCasp (10/5) vs. App-KO-Pen1-JCasp (10/6)	-5.268	-43.38 to 32.85	No	ns
WT-Pen1-JCasp (10/5) vs. App-KO-Pen1-ScJCasp (10/6)	57.6	19.49 to 95.72	Yes	***
WT-Pen1-JCasp (10/5) vs. App-KO-Pen1-JCasp (10/6)	44.99	6.875 to 83.11	Yes	*
App-KO-Pen1-ScJCasp (10/6) vs. App-KO-Pen1-JCasp (10/6)	-12.62	-50.73 to 25.50	No	ns
Test details	Mean 1	Mean 2	Mean Diff.	SE of diff.	N1	N2	q	DF
fEPSP1/fEPSP1 X 100
WT-Pen1-ScJCasp (10/5) vs. WT-Pen1-JCasp (10/5)	100	100	0	14.77	10	10	0	360
WT-Pen1-ScJCasp (10/5) vs. App-KO-Pen1-ScJCasp (10/6)	100	100	0	14.77	10	10	0	360
WT-Pen1-ScJCasp (10/5) vs. App-KO-Pen1-JCasp (10/6)	100	100	0	14.77	10	10	0	360
WT-Pen1-JCasp (10/5) vs. App-KO-Pen1-ScJCasp (10/6)	100	100	0	14.77	10	10	0	360
WT-Pen1-JCasp (10/5) vs. App-KO-Pen1-JCasp (10/6)	100	100	0	14.77	10	10	0	360
App-KO-Pen1-ScJCasp (10/6) vs. App-KO-Pen1-JCasp (10/6)	100	100	0	14.77	10	10	0	360
fEPSP2/fEPSP1 X 100
WT-Pen1-ScJCasp (10/5) vs. WT-Pen1-JCasp (10/5)	205	233.3	-28.35	14.77	10	10	2.715	360
WT-Pen1-ScJCasp (10/5) vs. App-KO-Pen1-ScJCasp (10/6)	205	189.6	15.37	14.77	10	10	1.472	360
WT-Pen1-ScJCasp (10/5) vs. App-KO-Pen1-JCasp (10/6)	205	195.2	9.773	14.77	10	10	0.9359	360
WT-Pen1-JCasp (10/5) vs. App-KO-Pen1-ScJCasp (10/6)	233.3	189.6	43.72	14.77	10	10	4.187	360
WT-Pen1-JCasp (10/5) vs. App-KO-Pen1-JCasp (10/6)	233.3	195.2	38.12	14.77	10	10	3.651	360
App-KO-Pen1-ScJCasp (10/6) vs. App-KO-Pen1-JCasp (10/6)	189.6	195.2	-5.6	14.77	10	10	0.5363	360
fEPSP3/fEPSP1 X 100
WT-Pen1-ScJCasp (10/5) vs. WT-Pen1-JCasp (10/5)	209.6	266.8	-57.17	14.77	10	10	5.475	360
WT-Pen1-ScJCasp (10/5) vs. App-KO-Pen1-ScJCasp (10/6)	209.6	195.6	14	14.77	10	10	1.341	360
WT-Pen1-ScJCasp (10/5) vs. App-KO-Pen1-JCasp (10/6)	209.6	205	4.603	14.77	10	10	0.4408	360
WT-Pen1-JCasp (10/5) vs. App-KO-Pen1-ScJCasp (10/6)	266.8	195.6	71.17	14.77	10	10	6.816	360
WT-Pen1-JCasp (10/5) vs. App-KO-Pen1-JCasp (10/6)	266.8	205	61.78	14.77	10	10	5.916	360
App-KO-Pen1-ScJCasp (10/6) vs. App-KO-Pen1-JCasp (10/6)	195.6	205	-9.396	14.77	10	10	0.8998	360
fEPSP42/fEPSP1 X 100
WT-Pen1-ScJCasp (10/5) vs. WT-Pen1-JCasp (10/5)	193.2	253.6	-60.35	14.77	10	10	5.779	360
WT-Pen1-ScJCasp (10/5) vs. App-KO-Pen1-ScJCasp (10/6)	193.2	185	8.222	14.77	10	10	0.7874	360
WT-Pen1-ScJCasp (10/5) vs. App-KO-Pen1-JCasp (10/6)	193.2	194.1	-0.8593	14.77	10	10	0.08229	360
WT-Pen1-JCasp (10/5) vs. App-KO-Pen1-ScJCasp (10/6)	253.6	185	68.57	14.77	10	10	6.567	360
WT-Pen1-JCasp (10/5) vs. App-KO-Pen1-JCasp (10/6)	253.6	194.1	59.49	14.77	10	10	5.697	360
App-KO-Pen1-ScJCasp (10/6) vs. App-KO-Pen1-JCasp (10/6)	185	194.1	-9.081	14.77	10	10	0.8697	360
fEPSP5/fEPSP1 X 100
WT-Pen1-ScJCasp (10/5) vs. WT-Pen1-JCasp (10/5)	182.3	240.5	-58.22	14.77	10	10	5.576	360
WT-Pen1-ScJCasp (10/5) vs. App-KO-Pen1-ScJCasp (10/6)	182.3	175.7	6.524	14.77	10	10	0.6248	360
WT-Pen1-ScJCasp (10/5) vs. App-KO-Pen1-JCasp (10/6)	182.3	185.3	-3.02	14.77	10	10	0.2892	360
WT-Pen1-JCasp (10/5) vs. App-KO-Pen1-ScJCasp (10/6)	240.5	175.7	64.75	14.77	10	10	6.201	360
WT-Pen1-JCasp (10/5) vs. App-KO-Pen1-JCasp (10/6)	240.5	185.3	55.2	14.77	10	10	5.287	360
App-KO-Pen1-ScJCasp (10/6) vs. App-KO-Pen1-JCasp (10/6)	175.7	185.3	-9.543	14.77	10	10	0.914	360
fEPSP6/fEPSP1 X 100
WT-Pen1-ScJCasp (10/5) vs. WT-Pen1-JCasp (10/5)	172.7	228.2	-55.44	14.77	10	10	5.31	360
WT-Pen1-ScJCasp (10/5) vs. App-KO-Pen1-ScJCasp (10/6)	172.7	168.9	3.794	14.77	10	10	0.3633	360
WT-Pen1-ScJCasp (10/5) vs. App-KO-Pen1-JCasp (10/6)	172.7	179.2	-6.519	14.77	10	10	0.6243	360
WT-Pen1-JCasp (10/5) vs. App-KO-Pen1-ScJCasp (10/6)	228.2	168.9	59.24	14.77	10	10	5.673	360
WT-Pen1-JCasp (10/5) vs. App-KO-Pen1-JCasp (10/6)	228.2	179.2	48.92	14.77	10	10	4.685	360
App-KO-Pen1-ScJCasp (10/6) vs. App-KO-Pen1-JCasp (10/6)	168.9	179.2	-10.31	14.77	10	10	0.9876	360
fEPSP7/fEPSP1 X 100
WT-Pen1-ScJCasp (10/5) vs. WT-Pen1-JCasp (10/5)	165.5	225	-59.52	14.77	10	10	5.7	360
WT-Pen1-ScJCasp (10/5) vs. App-KO-Pen1-ScJCasp (10/6)	165.5	162.7	2.741	14.77	10	10	0.2625	360
WT-Pen1-ScJCasp (10/5) vs. App-KO-Pen1-JCasp (10/6)	165.5	175	-9.537	14.77	10	10	0.9133	360
WT-Pen1-JCasp (10/5) vs. App-KO-Pen1-ScJCasp (10/6)	225	162.7	62.27	14.77	10	10	5.963	360
WT-Pen1-JCasp (10/5) vs. App-KO-Pen1-JCasp (10/6)	225	175	49.99	14.77	10	10	4.787	360
App-KO-Pen1-ScJCasp (10/6) vs. App-KO-Pen1-JCasp (10/6)	162.7	175	-12.28	14.77	10	10	1.176	360
fEPSP8/fEPSP1 X 100
WT-Pen1-ScJCasp (10/5) vs. WT-Pen1-JCasp (10/5)	162	214.8	-52.81	14.77	10	10	5.057	360
WT-Pen1-ScJCasp (10/5) vs. App-KO-Pen1-ScJCasp (10/6)	162	159	2.961	14.77	10	10	0.2835	360
WT-Pen1-ScJCasp (10/5) vs. App-KO-Pen1-JCasp (10/6)	162	169.9	-7.904	14.77	10	10	0.7569	360
WT-Pen1-JCasp (10/5) vs. App-KO-Pen1-ScJCasp (10/6)	214.8	159	55.77	14.77	10	10	5.341	360
WT-Pen1-JCasp (10/5) vs. App-KO-Pen1-JCasp (10/6)	214.8	169.9	44.9	14.77	10	10	4.3	360
App-KO-Pen1-ScJCasp (10/6) vs. App-KO-Pen1-JCasp (10/6)	159	169.9	-10.86	14.77	10	10	1.04	360
fEPSP9/fEPSP1 X 100
WT-Pen1-ScJCasp (10/5) vs. WT-Pen1-JCasp (10/5)	158.3	213	-54.68	14.77	10	10	5.237	360
WT-Pen1-ScJCasp (10/5) vs. App-KO-Pen1-ScJCasp (10/6)	158.3	152.9	5.463	14.77	10	10	0.5232	360
WT-Pen1-ScJCasp (10/5) vs. App-KO-Pen1-JCasp (10/6)	158.3	163.8	-5.443	14.77	10	10	0.5213	360
WT-Pen1-JCasp (10/5) vs. App-KO-Pen1-ScJCasp (10/6)	213	152.9	60.14	14.77	10	10	5.76	360
WT-Pen1-JCasp (10/5) vs. App-KO-Pen1-JCasp (10/6)	213	163.8	49.24	14.77	10	10	4.715	360
App-KO-Pen1-ScJCasp (10/6) vs. App-KO-Pen1-JCasp (10/6)	152.9	163.8	-10.91	14.77	10	10	1.044	360
fEPSP10/fEPSP1 X 100
WT-Pen1-ScJCasp (10/5) vs. WT-Pen1-JCasp (10/5)	152.7	203	-50.26	14.77	10	10	4.813	360
WT-Pen1-ScJCasp (10/5) vs. App-KO-Pen1-ScJCasp (10/6)	152.7	145.4	7.347	14.77	10	10	0.7036	360
WT-Pen1-ScJCasp (10/5) vs. App-KO-Pen1-JCasp (10/6)	152.7	158	-5.268	14.77	10	10	0.5045	360
WT-Pen1-JCasp (10/5) vs. App-KO-Pen1-ScJCasp (10/6)	203	145.4	57.6	14.77	10	10	5.517	360
WT-Pen1-JCasp (10/5) vs. App-KO-Pen1-JCasp (10/6)	203	158	44.99	14.77	10	10	4.309	360
App-KO-Pen1-ScJCasp (10/6) vs. App-KO-Pen1-JCasp (10/6)	145.4	158	-12.62	14.77	10	10	1.208	360

## Sheet: main Treatment effect
Compare TREATMENT means (main TREATMENT effect)
Number of families	1
Number of comparisons per family	6
Alpha	0.05
Tukey's multiple comparisons test	Mean Diff.	95% CI of diff.	Significant?	Summary
WT-Pen1-ScJCasp (10/5) vs. WT-Pen1-JCasp (10/5)	-47.68	-83.03 to -12.33	Yes	**
WT-Pen1-ScJCasp (10/5) vs. App-KO-Pen1-ScJCasp (10/6)	6.642	-28.71 to 41.99	No	ns
WT-Pen1-ScJCasp (10/5) vs. App-KO-Pen1-JCasp (10/6)	-2.417	-37.77 to 32.93	No	ns
WT-Pen1-JCasp (10/5) vs. App-KO-Pen1-ScJCasp (10/6)	54.32	18.97 to 89.67	Yes	**
WT-Pen1-JCasp (10/5) vs. App-KO-Pen1-JCasp (10/6)	45.26	9.914 to 80.61	Yes	**
App-KO-Pen1-ScJCasp (10/6) vs. App-KO-Pen1-JCasp (10/6)	-9.06	-44.41 to 26.29	No	ns
Test details	Mean 1	Mean 2	Mean Diff.	SE of diff.	N1	N2	q	DF
WT-Pen1-ScJCasp (10/5) vs. WT-Pen1-JCasp (10/5)	170.1	217.8	-47.68	13.13	100	100	5.137	36
WT-Pen1-ScJCasp (10/5) vs. App-KO-Pen1-ScJCasp (10/6)	170.1	163.5	6.642	13.13	100	100	0.7157	36
WT-Pen1-ScJCasp (10/5) vs. App-KO-Pen1-JCasp (10/6)	170.1	172.6	-2.417	13.13	100	100	0.2605	36
WT-Pen1-JCasp (10/5) vs. App-KO-Pen1-ScJCasp (10/6)	217.8	163.5	54.32	13.13	100	100	5.853	36
WT-Pen1-JCasp (10/5) vs. App-KO-Pen1-JCasp (10/6)	217.8	172.6	45.26	13.13	100	100	4.877	36
App-KO-Pen1-ScJCasp (10/6) vs. App-KO-Pen1-JCasp (10/6)	163.5	172.6	-9.06	13.13	100	100	0.9762	36
