# Supplementary material for: APP and APLP2 interact with the synaptic release machinery and facilitate transmitter release at hippocampal synapses
Source: eLife. 2015 Nov 9;4:e09743. doi: 10.7554/eLife.09743 (PMC4755753; doi:10.7554/eLife.09743)
Supplement: Figure 11—source data 1. — DOI: http://dx.doi.org/10.7554/eLife.09743.032 [file elife-09743-fig11-data1.xlsx]

## Sheet: Two-way RM ANOVA
Table Analyzed	in-/output
Two-way RM ANOVA	Matching: Stacked
Alpha	0.05
Source of Variation	% of total variation	P value	P value summary	Significant?
Interaction	1.397	< 0.0001	****	Yes
Volley	46.02	< 0.0001	****	Yes
Genotype	5.672	0.0016	**	Yes
Subjects (matching)	31.27	< 0.0001	****	Yes
ANOVA table	SS	DF	MS	F (DFn, DFd)	P value
Interaction	0.6998	24	0.02916	F (24, 728) = 3.326	P < 0.0001
Volley	23.04	8	2.881	F (8, 728) = 328.5	P < 0.0001
Genotype	2.84	3	0.9468	F (3, 91) = 5.502	P = 0.0016
Subjects (matching)	15.66	91	0.1721	F (91, 728) = 19.63	P < 0.0001
Residual	6.383	728	0.008768
Number of missing values	0

## Sheet: tukey's
Compare column means (main column effect)
Number of families	1
Number of comparisons per family	6
Alpha	0.05
Tukey's multiple comparisons test	Mean Diff.	95% CI of diff.	Significant?	Summary
APP-KO (26/8) vs. WT (27/8)	-0.07892	-0.1784 to 0.02051	No	ns
APP-KO (26/8) vs. APLP2-KO (26/8)	-0.148	-0.2484 to -0.04763	Yes	**
APP-KO (26/8) vs. APP/APLP2-KO (16/6)	-0.1235	-0.2385 to -0.008534	Yes	*
WT (27/8) vs. APLP2-KO (26/8)	-0.06907	-0.1685 to 0.03036	No	ns
WT (27/8) vs. APP/APLP2-KO (16/6)	-0.0446	-0.1588 to 0.06957	No	ns
APLP2-KO (26/8) vs. APP/APLP2-KO (16/6)	0.02447	-0.09051 to 0.1395	No	ns
Test details	Mean 1	Mean 2	Mean Diff.	SE of diff.	N1	N2	q
APP-KO (26/8) vs. WT (27/8)	-0.4308	-0.3518	-0.07892	0.03799	234	243	2.938
APP-KO (26/8) vs. APLP2-KO (26/8)	-0.4308	-0.2828	-0.148	0.03835	234	234	5.457
APP-KO (26/8) vs. APP/APLP2-KO (16/6)	-0.4308	-0.3073	-0.1235	0.04393	234	144	3.976
WT (27/8) vs. APLP2-KO (26/8)	-0.3518	-0.2828	-0.06907	0.03799	243	234	2.571
WT (27/8) vs. APP/APLP2-KO (16/6)	-0.3518	-0.3073	-0.0446	0.04362	243	144	1.446
APLP2-KO (26/8) vs. APP/APLP2-KO (16/6)	-0.2828	-0.3073	0.02447	0.04393	234	144	0.7878
