# Supplementary material for: APP and APLP2 interact with the synaptic release machinery and facilitate transmitter release at hippocampal synapses
Source: eLife. 2015 Nov 9;4:e09743. doi: 10.7554/eLife.09743 (PMC4755753; doi:10.7554/eLife.09743)
Supplement: Figure 11—source data 2. — DOI: http://dx.doi.org/10.7554/eLife.09743.033 [file elife-09743-fig11-data2.xlsx]

## Sheet: Two-way RM ANOVA
Table Analyzed	PPR
Two-way RM ANOVA	Matching: Stacked
Alpha	0.05
Source of Variation	% of total variation	P value	P value summary	Significant?
Interaction	1.099	< 0.0001	****	Yes
Interstimulus Interval	71.99	< 0.0001	****	Yes
Genotype	3.619	< 0.0001	****	Yes
Subjects (matching)	11.98	< 0.0001	****	Yes
ANOVA table	SS	DF	MS	F (DFn, DFd)	P value
Interaction	1.617	15	0.1078	F (15, 455) = 3.145	P < 0.0001
Interstimulus Interval	105.9	5	21.17	F (5, 455) = 617.8	P < 0.0001
Genotype	5.322	3	1.774	F (3, 91) = 9.161	P < 0.0001
Subjects (matching)	17.62	91	0.1936	F (91, 455) = 5.650	P < 0.0001
Residual	15.59	455	0.03427
Number of missing values	0

## Sheet: tukey's
Within each row, compare columns (simple effects within rows)
Number of families	6
Number of comparisons per family	6
Alpha	0.05
Tukey's multiple comparisons test	Mean Diff.	95% CI of diff.	Significant?	Summary
Row 1
WT (27/8) vs. APP-KO (26/8)	-0.01968	-0.1943 to 0.1550	No	ns
WT (27/8) vs. APLP2-KO (26/8)	0.007225	-0.1674 to 0.1819	No	ns
WT (27/8) vs. APP/APLP2-KO (16/6)	-0.07898	-0.2795 to 0.1216	No	ns
APP-KO (26/8) vs. APLP2-KO (26/8)	0.0269	-0.1494 to 0.2032	No	ns
APP-KO (26/8) vs. APP/APLP2-KO (16/6)	-0.0593	-0.2613 to 0.1427	No	ns
APLP2-KO (26/8) vs. APP/APLP2-KO (16/6)	-0.0862	-0.2882 to 0.1158	No	ns
Row 2
WT (27/8) vs. APP-KO (26/8)	-0.05798	-0.2326 to 0.1167	No	ns
WT (27/8) vs. APLP2-KO (26/8)	-0.07005	-0.2447 to 0.1046	No	ns
WT (27/8) vs. APP/APLP2-KO (16/6)	-0.1751	-0.3757 to 0.02539	No	ns
APP-KO (26/8) vs. APLP2-KO (26/8)	-0.01207	-0.1883 to 0.1642	No	ns
APP-KO (26/8) vs. APP/APLP2-KO (16/6)	-0.1172	-0.3191 to 0.08480	No	ns
APLP2-KO (26/8) vs. APP/APLP2-KO (16/6)	-0.1051	-0.3070 to 0.09687	No	ns
Row 3
WT (27/8) vs. APP-KO (26/8)	-0.08401	-0.2587 to 0.09063	No	ns
WT (27/8) vs. APLP2-KO (26/8)	-0.0806	-0.2552 to 0.09405	No	ns
WT (27/8) vs. APP/APLP2-KO (16/6)	-0.3104	-0.5109 to -0.1099	Yes	***
APP-KO (26/8) vs. APLP2-KO (26/8)	0.003419	-0.1729 to 0.1797	No	ns
APP-KO (26/8) vs. APP/APLP2-KO (16/6)	-0.2264	-0.4283 to -0.02442	Yes	*
APLP2-KO (26/8) vs. APP/APLP2-KO (16/6)	-0.2298	-0.4318 to -0.02784	Yes	*
Row 4
WT (27/8) vs. APP-KO (26/8)	-0.02612	-0.2008 to 0.1485	No	ns
WT (27/8) vs. APLP2-KO (26/8)	-0.1608	-0.3354 to 0.01388	No	ns
WT (27/8) vs. APP/APLP2-KO (16/6)	-0.3521	-0.5527 to -0.1516	Yes	****
APP-KO (26/8) vs. APLP2-KO (26/8)	-0.1346	-0.3109 to 0.04164	No	ns
APP-KO (26/8) vs. APP/APLP2-KO (16/6)	-0.326	-0.5280 to -0.1241	Yes	***
APLP2-KO (26/8) vs. APP/APLP2-KO (16/6)	-0.1914	-0.3933 to 0.01057	No	ns
Row 5
WT (27/8) vs. APP-KO (26/8)	0.08296	-0.09169 to 0.2576	No	ns
WT (27/8) vs. APLP2-KO (26/8)	-0.1162	-0.2909 to 0.05843	No	ns
WT (27/8) vs. APP/APLP2-KO (16/6)	-0.3546	-0.5552 to -0.1541	Yes	****
APP-KO (26/8) vs. APLP2-KO (26/8)	-0.1992	-0.3754 to -0.02288	Yes	*
APP-KO (26/8) vs. APP/APLP2-KO (16/6)	-0.4376	-0.6396 to -0.2356	Yes	****
APLP2-KO (26/8) vs. APP/APLP2-KO (16/6)	-0.2384	-0.4404 to -0.03648	Yes	*
Row 6
WT (27/8) vs. APP-KO (26/8)	0.08496	-0.08968 to 0.2596	No	ns
WT (27/8) vs. APLP2-KO (26/8)	-0.09198	-0.2666 to 0.08266	No	ns
WT (27/8) vs. APP/APLP2-KO (16/6)	-0.342	-0.5425 to -0.1415	Yes	****
APP-KO (26/8) vs. APLP2-KO (26/8)	-0.1769	-0.3532 to -0.0006602	Yes	*
APP-KO (26/8) vs. APP/APLP2-KO (16/6)	-0.4269	-0.6289 to -0.2250	Yes	****
APLP2-KO (26/8) vs. APP/APLP2-KO (16/6)	-0.25	-0.4520 to -0.04804	Yes	**
Test details	Mean 1	Mean 2	Mean Diff.	SE of diff.
Row 1
WT (27/8) vs. APP-KO (26/8)	1.103	1.123	-0.01968	0.06777
WT (27/8) vs. APLP2-KO (26/8)	1.103	1.096	0.007225	0.06777
WT (27/8) vs. APP/APLP2-KO (16/6)	1.103	1.182	-0.07898	0.07782
APP-KO (26/8) vs. APLP2-KO (26/8)	1.123	1.096	0.0269	0.06841
APP-KO (26/8) vs. APP/APLP2-KO (16/6)	1.123	1.182	-0.0593	0.07837
APLP2-KO (26/8) vs. APP/APLP2-KO (16/6)	1.096	1.182	-0.0862	0.07837
Row 2
WT (27/8) vs. APP-KO (26/8)	1.169	1.227	-0.05798	0.06777
WT (27/8) vs. APLP2-KO (26/8)	1.169	1.239	-0.07005	0.06777
WT (27/8) vs. APP/APLP2-KO (16/6)	1.169	1.344	-0.1751	0.07782
APP-KO (26/8) vs. APLP2-KO (26/8)	1.227	1.239	-0.01207	0.06841
APP-KO (26/8) vs. APP/APLP2-KO (16/6)	1.227	1.344	-0.1172	0.07837
APLP2-KO (26/8) vs. APP/APLP2-KO (16/6)	1.239	1.344	-0.1051	0.07837
Row 3
WT (27/8) vs. APP-KO (26/8)	1.502	1.586	-0.08401	0.06777
WT (27/8) vs. APLP2-KO (26/8)	1.502	1.583	-0.0806	0.06777
WT (27/8) vs. APP/APLP2-KO (16/6)	1.502	1.813	-0.3104	0.07782
APP-KO (26/8) vs. APLP2-KO (26/8)	1.586	1.583	0.003419	0.06841
APP-KO (26/8) vs. APP/APLP2-KO (16/6)	1.586	1.813	-0.2264	0.07837
APLP2-KO (26/8) vs. APP/APLP2-KO (16/6)	1.583	1.813	-0.2298	0.07837
Row 4
WT (27/8) vs. APP-KO (26/8)	1.853	1.879	-0.02612	0.06777
WT (27/8) vs. APLP2-KO (26/8)	1.853	2.014	-0.1608	0.06777
WT (27/8) vs. APP/APLP2-KO (16/6)	1.853	2.205	-0.3521	0.07782
APP-KO (26/8) vs. APLP2-KO (26/8)	1.879	2.014	-0.1346	0.06841
APP-KO (26/8) vs. APP/APLP2-KO (16/6)	1.879	2.205	-0.326	0.07837
APLP2-KO (26/8) vs. APP/APLP2-KO (16/6)	2.014	2.205	-0.1914	0.07837
Row 5
WT (27/8) vs. APP-KO (26/8)	2.091	2.009	0.08296	0.06777
WT (27/8) vs. APLP2-KO (26/8)	2.091	2.208	-0.1162	0.06777
WT (27/8) vs. APP/APLP2-KO (16/6)	2.091	2.446	-0.3546	0.07782
APP-KO (26/8) vs. APLP2-KO (26/8)	2.009	2.208	-0.1992	0.06841
APP-KO (26/8) vs. APP/APLP2-KO (16/6)	2.009	2.446	-0.4376	0.07837
APLP2-KO (26/8) vs. APP/APLP2-KO (16/6)	2.208	2.446	-0.2384	0.07837
Row 6
WT (27/8) vs. APP-KO (26/8)	2.172	2.087	0.08496	0.06777
WT (27/8) vs. APLP2-KO (26/8)	2.172	2.264	-0.09198	0.06777
WT (27/8) vs. APP/APLP2-KO (16/6)	2.172	2.514	-0.342	0.07782
APP-KO (26/8) vs. APLP2-KO (26/8)	2.087	2.264	-0.1769	0.06841
APP-KO (26/8) vs. APP/APLP2-KO (16/6)	2.087	2.514	-0.4269	0.07837
APLP2-KO (26/8) vs. APP/APLP2-KO (16/6)	2.264	2.514	-0.25	0.07837
