# Supplementary material for: APP and APLP2 interact with the synaptic release machinery and facilitate transmitter release at hippocampal synapses
Source: eLife. 2015 Nov 9;4:e09743. doi: 10.7554/eLife.09743 (PMC4755753; doi:10.7554/eLife.09743)
Supplement: Figure 11—source data 3. — DOI: http://dx.doi.org/10.7554/eLife.09743.034 [file elife-09743-fig11-data3.xlsx]

## Sheet: Two-way RM ANOVA
Table Analyzed	train
Two-way RM ANOVA	Matching: Stacked
Alpha	0.05
Source of Variation	% of total variation	P value	P value summary	Significant?
Interaction	1.293	< 0.0001	****	Yes
stimulus	1.084	< 0.0001	****	Yes
genotype	24.43	< 0.0001	****	Yes
Subjects (matching)	68.11	< 0.0001	****	Yes
ANOVA table	SS	DF	MS	F (DFn, DFd)	P value
Interaction	97329	24	4055	F (24, 728) = 7.504	P < 0.0001
stimulus	81605	8	10201	F (8, 728) = 18.87	P < 0.0001
genotype	1839000	3	612997	F (3, 91) = 10.88	P < 0.0001
Subjects (matching)	5127000	91	56337	F (91, 728) = 104.2	P < 0.0001
Residual	393434	728	540.4
Number of missing values	0

## Sheet: tukey's
Compare column means (main column effect)
Number of families	1
Number of comparisons per family	6
Alpha	0.05
Tukey's multiple comparisons test	Mean Diff.	95% CI of diff.	Significant?	Summary
WT (27/8) vs. APP-KO (26/8)	-7.789	-64.68 to 49.11	No	ns
WT (27/8) vs. APLP2-KO (26/8)	-53.93	-110.8 to 2.962	No	ns
WT (27/8) vs. APP/APLP2-KO (16/6)	-129.9	-195.2 to -64.55	Yes	****
APP-KO (26/8) vs. APLP2-KO (26/8)	-46.14	-103.6 to 11.29	No	ns
APP-KO (26/8) vs. APP/APLP2-KO (16/6)	-122.1	-187.9 to -56.30	Yes	****
APLP2-KO (26/8) vs. APP/APLP2-KO (16/6)	-75.95	-141.7 to -10.15	Yes	*
Test details	Mean 1	Mean 2	Mean Diff.	SE of diff.	N1	N2	q	DF
WT (27/8) vs. APP-KO (26/8)	193.9	201.7	-7.789	21.74	243	234	0.5067	91
WT (27/8) vs. APLP2-KO (26/8)	193.9	247.9	-53.93	21.74	243	234	3.509	91
WT (27/8) vs. APP/APLP2-KO (16/6)	193.9	323.8	-129.9	24.96	243	144	7.359	91
APP-KO (26/8) vs. APLP2-KO (26/8)	201.7	247.9	-46.14	21.94	234	234	2.974	91
APP-KO (26/8) vs. APP/APLP2-KO (16/6)	201.7	323.8	-122.1	25.14	234	144	6.868	91
APLP2-KO (26/8) vs. APP/APLP2-KO (16/6)	247.9	323.8	-75.95	25.14	234	144	4.272	91
