# Supplementary material for: APP and APLP2 interact with the synaptic release machinery and facilitate transmitter release at hippocampal synapses
Source: eLife. 2015 Nov 9;4:e09743. doi: 10.7554/eLife.09743 (PMC4755753; doi:10.7554/eLife.09743)
Supplement: Figure 12—source data 1. — DOI: http://dx.doi.org/10.7554/eLife.09743.036 [file elife-09743-fig12-data1.xlsx]

## Sheet: ANOVA summary
Table Analyzed	Frequency
ANOVA summary
F	2.512
P value	0.0762
P value summary	ns
Are differences among means statistically significant? (P < 0.05)	No
R square	0.1906
Brown-Forsythe test
F (DFn, DFd)	0.6443 (3, 32)
P value	0.5922
P value summary	ns
Significantly different standard deviations? (P < 0.05)	No
Bartlett's test
Bartlett's statistic (corrected)	3.317
P value	0.3452
P value summary	ns
Significantly different standard deviations? (P < 0.05)	No
ANOVA table	SS	DF	MS	F (DFn, DFd)	P value
Treatment (between columns)	0.08573	3	0.02858	F (3, 32) = 2.512	P = 0.0762
Residual (within columns)	0.364	32	0.01138
Total	0.4498	35
Data summary
Number of treatments (columns)	4
Number of values (total)	36

## Sheet: Uncorrected Fisher's LSD
Number of families	1
Number of comparisons per family	6
Alpha	0.05
Uncorrected Fisher's LSD	Mean Diff.	95% CI of diff.	Significant?	Summary	Individual P Value
WT(10/4) vs. App-KO (10/4)	0.05169	-0.05694 to 0.1603	No	ns	0.3397	A-B
WT(10/4) vs. Aplp2-KO (12/4)	0.1074	0.004320 to 0.2104	Yes	*	0.0416	A-C
WT(10/4) vs. App/Aplp2-dKO (12/3)	0.126	0.02290 to 0.2290	Yes	*	0.0182	A-D
App-KO (10/4) vs. Aplp2-KO (12/4)	0.05569	-0.04737 to 0.1587	No	ns	0.2792	B-C
App-KO (10/4) vs. App/Aplp2-dKO (12/3)	0.07426	-0.02879 to 0.1773	No	ns	0.1519	B-D
Aplp2-KO (12/4) vs. App/Aplp2-dKO (12/3)	0.01858	-0.07858 to 0.1157	No	ns	0.6995	C-D
Test details	Mean 1	Mean 2	Mean Diff.	SE of diff.	n1	n2	t	DF
WT(10/4) vs. App-KO (10/4)	0.3406	0.2889	0.05169	0.05333	8	8	0.9692	32
WT(10/4) vs. Aplp2-KO (12/4)	0.3406	0.2332	0.1074	0.05059	8	10	2.122	32
WT(10/4) vs. App/Aplp2-dKO (12/3)	0.3406	0.2146	0.126	0.05059	8	10	2.49	32
App-KO (10/4) vs. Aplp2-KO (12/4)	0.2889	0.2332	0.05569	0.05059	8	10	1.101	32
App-KO (10/4) vs. App/Aplp2-dKO (12/3)	0.2889	0.2146	0.07426	0.05059	8	10	1.468	32
Aplp2-KO (12/4) vs. App/Aplp2-dKO (12/3)	0.2332	0.2146	0.01858	0.0477	10	10	0.3895	32
