# Supplementary material for: APP and APLP2 interact with the synaptic release machinery and facilitate transmitter release at hippocampal synapses
Source: eLife. 2015 Nov 9;4:e09743. doi: 10.7554/eLife.09743 (PMC4755753; doi:10.7554/eLife.09743)
Supplement: Figure 12—source data 2. — DOI: http://dx.doi.org/10.7554/eLife.09743.037 [file elife-09743-fig12-data2.xlsx]

## Sheet: Ordinary oneway-ANOVA
Table Analyzed	Decay Time
ANOVA summary
F	12.75
P value	< 0.0001
P value summary	****
Are differences among means statistically significant? (P < 0.05)	Yes
R square	0.4888
Brown-Forsythe test
F (DFn, DFd)	3.034 (3, 40)
P value	0.0402
P value summary	*
Significantly different standard deviations? (P < 0.05)	Yes
Bartlett's test
Bartlett's statistic (corrected)	15.83
P value	0.0012
P value summary	**
Significantly different standard deviations? (P < 0.05)	Yes
ANOVA table	SS	DF	MS	F (DFn, DFd)	P value
Treatment (between columns)	71.93	3	23.98	F (3, 40) = 12.75	P < 0.0001
Residual (within columns)	75.22	40	1.88
Total	147.2	43
Data summary
Number of treatments (columns)	4
Number of values (total)	44

## Sheet: tukeys
Number of families	1
Number of comparisons per family	6
Alpha	0.05
Tukey's multiple comparisons test	Mean Diff.	95% CI of diff.	Significant?	Summary
WT(10/4) vs. App-KO (10/4)	-0.2237	-1.868 to 1.420	No	ns		A-B
WT(10/4) vs. Aplp2-KO (12/4)	-0.4908	-2.065 to 1.083	No	ns		A-C
WT(10/4) vs. App/Aplp2-dKO (12/3)	-3.098	-4.672 to -1.524	Yes	****		A-D
App-KO (10/4) vs. Aplp2-KO (12/4)	-0.2671	-1.841 to 1.307	No	ns		B-C
App-KO (10/4) vs. App/Aplp2-dKO (12/3)	-2.875	-4.448 to -1.301	Yes	****		B-D
Aplp2-KO (12/4) vs. App/Aplp2-dKO (12/3)	-2.607	-4.108 to -1.107	Yes	***		C-D
Test details	Mean 1	Mean 2	Mean Diff.	SE of diff.	n1	n2	q	DF
WT(10/4) vs. App-KO (10/4)	6.364	6.587	-0.2237	0.6133	10	10	0.5159	40
WT(10/4) vs. Aplp2-KO (12/4)	6.364	6.855	-0.4908	0.5872	10	12	1.182	40
WT(10/4) vs. App/Aplp2-dKO (12/3)	6.364	9.462	-3.098	0.5872	10	12	7.462	40
App-KO (10/4) vs. Aplp2-KO (12/4)	6.587	6.855	-0.2671	0.5872	10	12	0.6433	40
App-KO (10/4) vs. App/Aplp2-dKO (12/3)	6.587	9.462	-2.875	0.5872	10	12	6.924	40
Aplp2-KO (12/4) vs. App/Aplp2-dKO (12/3)	6.855	9.462	-2.607	0.5598	12	12	6.587	40
